# Supplementary material for: Construction of possible integrated predictive index based on EGFR and ANXA3 polymorphisms for chemotherapy response in fluoropyrimidine-treated Japanese gastric cancer patients using a bioinformatic method
Source: BMC Cancer. 2015 Oct 16;15:718. doi: 10.1186/s12885-015-1721-z (PMC4609065; doi:10.1186/s12885-015-1721-z)
Supplement: Additional file 5: Table S3. — Statistical information about the chemotherapeutic response of gastric cancer patients treated with fluoropyrimidine (p < 0.05). (XLS 772 kb) [file 12885_2015_1721_MOESM5_ESM.xls]

## Sheet: TableS3
	Table S3 Statistical information about the chemotherapeutic response of gastric cancer patients treated with fluoropyrimidine (p < 0.05)
	RS number	Major allele	Minor allele	Sample size	Ratio of major allele	Ratio of minor allele	Ratio of major homozygote	Ratio of heterozygote	Ratio of minor homozygote	p value
	rs1000709	A	G	119	0.642857	0.357143	0.428571	0.428571	0.142857	0.0131398
	rs1001065	T	C	119	0.659664	0.340336	0.462185	0.394958	0.142857	0.0210071
	rs1002029	G	T	119	0.521008	0.478992	0.294118	0.453782	0.252101	0.0107932
	rs1002077	A	G	119	0.579832	0.420168	0.344538	0.470588	0.184874	0.0100079
	rs1002681	C	T	119	0.546218	0.453782	0.310924	0.470588	0.218487	0.0284099
	rs1005580	T	C	119	0.663866	0.336134	0.571429	0.184874	0.243697	0.00182078
	rs1008079	C	G	119	0.630252	0.369748	0.428571	0.403361	0.168067	0.0235354
	rs1009281	A	G	119	0.781513	0.218487	0.621849	0.319328	0.0588235	0.00086613
	rs1010800	A	G	119	0.542017	0.457983	0.310924	0.462185	0.226891	0.048277
	rs1013588	C	T	119	0.810924	0.189076	0.663866	0.294118	0.0420168	0.0217839
	rs1019249	C	A	119	0.546218	0.453782	0.327731	0.436975	0.235294	0.0462719
	rs1044307	T	C	119	0.739496	0.260504	0.554622	0.369748	0.0756303	7.41194e-06
	rs1044311	T	C	119	0.638655	0.361345	0.537815	0.201681	0.260504	0.0134669
	rs1046680	T	A	119	0.57563	0.42437	0.336134	0.478992	0.184874	0.0441888
	rs1054998	A	G	119	0.840336	0.159664	0.697479	0.285714	0.0168067	0.0473077
	rs1060812	G	A	119	0.701681	0.298319	0.478992	0.445378	0.0756303	0.0477552
	rs1075470	C	T	119	0.684874	0.315126	0.495798	0.378151	0.12605	0.011895
	rs1150613	A	G	119	0.861345	0.138655	0.731092	0.260504	0.00840336	0.0360958
	rs1154782	T	A	119	0.680672	0.319328	0.621849	0.117647	0.260504	0.0187371
	rs1156353	G	A	119	0.756303	0.243697	0.563025	0.386555	0.0504202	0.0118508
	rs1158866	G	A	119	0.621849	0.378151	0.411765	0.420168	0.168067	0.0243501
	rs1190545	G	C	119	0.52521	0.47479	0.277311	0.495798	0.226891	0.0112594
	rs1208789	A	G	119	0.542017	0.457983	0.268908	0.546218	0.184874	0.048277
	rs1227222	T	C	119	0.571429	0.428571	0.369748	0.403361	0.226891	0.0460656
	rs1253005	G	A	119	0.693277	0.306723	0.470588	0.445378	0.0840336	0.018361
	rs1255182	C	T	119	0.554622	0.445378	0.336134	0.436975	0.226891	0.0300315
	rs1257670	G	A	119	0.651261	0.348739	0.470588	0.361345	0.168067	0.00401701
	rs12595	A	G	119	0.554622	0.445378	0.310924	0.487395	0.201681	0.011009
	rs1268538	C	T	119	0.920168	0.0798319	0.848739	0.142857	0.00840336	0.0130848
	rs12731	T	C	119	0.638655	0.361345	0.453782	0.369748	0.176471	0.0244867
	rs1275276	C	T	119	0.752101	0.247899	0.563025	0.378151	0.0588235	0.0383005
	rs1294559	C	T	119	0.701681	0.298319	0.495798	0.411765	0.092437	0.0285139
	rs1309	C	T	119	0.588235	0.411765	0.302521	0.571429	0.12605	0.00526249
	rs1317979	C	T	119	0.731092	0.268908	0.521008	0.420168	0.0588235	0.0236935
	rs1320015	A	G	119	0.781513	0.218487	0.613445	0.336134	0.0504202	0.0300604
	rs1321132	A	G	119	0.62605	0.37395	0.411765	0.428571	0.159664	0.00130596
	rs1326839	A	G	119	0.743697	0.256303	0.546218	0.394958	0.0588235	0.0369728
	rs1327918	T	C	119	0.521008	0.478992	0.268908	0.504202	0.226891	0.000945511
	rs1328327	C	T	119	0.537815	0.462185	0.285714	0.504202	0.210084	0.0466549
	rs1328589	C	A	119	0.516807	0.483193	0.252101	0.529412	0.218487	0.047674
	rs1330334	C	A	119	0.781513	0.218487	0.613445	0.336134	0.0504202	0.0142774
	rs1337643	A	G	119	0.521008	0.478992	0.285714	0.470588	0.243697	0.0294184
	rs1346604	G	C	119	0.605042	0.394958	0.344538	0.521008	0.134454	0.00155277
	rs1354756	C	T	119	0.521008	0.478992	0.294118	0.453782	0.252101	0.0461882
	rs1378726	G	A	119	0.684874	0.315126	0.504202	0.361345	0.134454	0.0330106
	rs1384401	G	A	119	0.743697	0.256303	0.546218	0.394958	0.0588235	0.0369728
	rs1392695	A	G	119	0.823529	0.176471	0.705882	0.235294	0.0588235	0.0342416
	rs1392702	A	G	119	0.794118	0.205882	0.647059	0.294118	0.0588235	0.0464793
	rs1396568	A	G	119	0.554622	0.445378	0.310924	0.487395	0.201681	0.0170896
	rs1414334	G	C	119	0.957983	0.0420168	0.94958	0.0168067	0.0336134	0.00865496
	rs1418256	T	C	119	0.542017	0.457983	0.294118	0.495798	0.210084	0.048277
	rs1421360	G	T	119	0.722689	0.277311	0.504202	0.436975	0.0588235	0.0452461
	rs1423832	G	A	119	0.571429	0.428571	0.327731	0.487395	0.184874	0.0182641
	rs1429309	C	T	119	0.630252	0.369748	0.394958	0.470588	0.134454	0.0235354
	rs1450418	T	C	119	0.848739	0.151261	0.714286	0.268908	0.0168067	0.0394239
	rs1451543	G	A	119	0.676471	0.323529	0.453782	0.445378	0.10084	0.0196638
	rs1452000	A	C	119	0.542017	0.457983	0.294118	0.495798	0.210084	0.048277
	rs1462476	T	G	119	0.592437	0.407563	0.352941	0.478992	0.168067	0.0430036
	rs1466982	G	T	119	0.865546	0.134454	0.739496	0.252101	0.00840336	0.0027938
	rs1471738	T	C	119	0.55042	0.44958	0.310924	0.478992	0.210084	0.0289833
	rs1484095	G	A	119	0.647059	0.352941	0.394958	0.504202	0.10084	0.0368427
	rs1486629	G	A	119	0.571429	0.428571	0.327731	0.487395	0.184874	0.0460656
	rs1488384	G	A	117	0.636752	0.363248	0.350427	0.57265	0.0769231	0.012561
	rs1489396	T	C	118	0.711864	0.288136	0.516949	0.389831	0.0932203	0.0439838
	rs1491306	G	C	119	0.504202	0.495798	0.235294	0.537815	0.226891	0.0302312
	rs1491962	T	C	119	0.865546	0.134454	0.764706	0.201681	0.0336134	0.0137672
	rs1506842	G	A	119	0.529412	0.470588	0.302521	0.453782	0.243697	0.0175722
	rs1509062	T	G	119	0.752101	0.247899	0.554622	0.394958	0.0504202	0.0116296
	rs1512327	A	G	119	0.756303	0.243697	0.588235	0.336134	0.0756303	0.0187928
	rs1517661	C	A	119	0.668067	0.331933	0.462185	0.411765	0.12605	0.0331915
	rs1519479	C	T	119	0.647059	0.352941	0.420168	0.453782	0.12605	0.0131071
	rs1519819	T	C	119	0.655462	0.344538	0.445378	0.420168	0.134454	0.0211538
	rs1531212	C	T	119	0.659664	0.340336	0.445378	0.428571	0.12605	0.00418743
	rs1533547	T	C	119	0.844538	0.155462	0.722689	0.243697	0.0336134	0.0223405
	rs1535982	A	C	119	0.533613	0.466387	0.277311	0.512605	0.210084	0.0295202
	rs1542678	T	G	119	0.60084	0.39916	0.403361	0.394958	0.201681	0.0431957
	rs1544357	T	G	119	0.563025	0.436975	0.327731	0.470588	0.201681	0.0172228
	rs1548630	G	A	119	0.57563	0.42437	0.319328	0.512605	0.168067	0.0273809
	rs1552422	G	A	119	0.613445	0.386555	0.386555	0.453782	0.159664	0.0147761
	rs1553960	A	G	119	0.592437	0.407563	0.344538	0.495798	0.159664	0.0162898
	rs1555573	G	T	119	0.735294	0.264706	0.512605	0.445378	0.0420168	0.0385804
	rs1563175	T	G	119	0.827731	0.172269	0.697479	0.260504	0.0420168	0.0302358
	rs1565401	C	G	119	0.663866	0.336134	0.428571	0.470588	0.10084	0.0121371
	rs1566467	C	T	119	0.848739	0.151261	0.722689	0.252101	0.0252101	0.0394239
	rs1569635	A	G	119	0.592437	0.407563	0.327731	0.529412	0.142857	0.0162898
	rs1573512	T	A	119	0.844538	0.155462	0.714286	0.260504	0.0252101	0.0427921
	rs1577454	T	C	119	0.957983	0.0420168	0.94958	0.0168067	0.0336134	0.00865496
	rs1597044	C	G	119	0.941176	0.0588235	0.890756	0.10084	0.00840336	0.0430232
	rs15996	C	G	119	0.542017	0.457983	0.243697	0.596639	0.159664	0.048277
	rs16821	T	C	119	0.571429	0.428571	0.310924	0.521008	0.168067	0.0460656
	rs170794	A	G	119	0.55042	0.44958	0.319328	0.462185	0.218487	0.00598716
	rs1709865	G	A	118	0.686441	0.313559	0.483051	0.40678	0.110169	0.018035
	rs1760670	C	T	119	0.890756	0.109244	0.789916	0.201681	0.00840336	0.0180291
	rs177415	C	A	119	0.747899	0.252101	0.554622	0.386555	0.0588235	0.020751
	rs1795970	G	A	119	0.567227	0.432773	0.327731	0.478992	0.193277	0.017786
	rs180427	G	A	119	0.546218	0.453782	0.361345	0.369748	0.268908	0.0284099
	rs1808973	G	A	119	0.596639	0.403361	0.344538	0.504202	0.151261	0.0442858
	rs1820068	T	G	119	0.558824	0.441176	0.302521	0.512605	0.184874	0.0295253
	rs1821814	A	G	119	0.617647	0.382353	0.411765	0.411765	0.176471	0.0254253
	rs1828454	G	A	119	0.571429	0.428571	0.344538	0.453782	0.201681	0.0272174
	rs1859646	A	G	119	0.777311	0.222689	0.630252	0.294118	0.0756303	0.0296681
	rs1867299	C	T	119	0.861345	0.138655	0.756303	0.210084	0.0336134	0.0160036
	rs1867502	C	A	118	0.580508	0.419492	0.330508	0.5	0.169492	0.0426505
	rs1869907	T	C	119	0.651261	0.348739	0.436975	0.428571	0.134454	0.0217238
	rs1873626	A	T	119	0.962185	0.0378151	0.932773	0.0588235	0.00840336	0.0319764
	rs1874361	T	G	119	0.680672	0.319328	0.411765	0.537815	0.0504202	0.00321755
	rs1879156	T	C	119	0.521008	0.478992	0.268908	0.504202	0.226891	0.0294184
	rs187991	C	T	119	0.701681	0.298319	0.512605	0.378151	0.109244	0.0175853
	rs1885643	T	A	119	0.546218	0.453782	0.436975	0.218487	0.344538	0.0182835
	rs1901223	A	G	119	0.579832	0.420168	0.336134	0.487395	0.176471	0.0100079
	rs1906457	G	T	119	0.773109	0.226891	0.605042	0.336134	0.0588235	0.0294054
	rs1917952	T	C	119	0.747899	0.252101	0.537815	0.420168	0.0420168	0.0114551
	rs1917961	T	A	119	0.747899	0.252101	0.537815	0.420168	0.0420168	0.0114551
	rs1921918	C	T	119	0.722689	0.277311	0.672269	0.10084	0.226891	0.0452461
	rs1933382	G	T	119	0.588235	0.411765	0.361345	0.453782	0.184874	0.0277088
	rs1943249	T	C	119	0.537815	0.462185	0.294118	0.487395	0.218487	0.0466549
	rs1944805	C	T	119	0.710084	0.289916	0.504202	0.411765	0.0840336	0.0444492
	rs1948719	T	C	118	0.95339	0.0466102	0.915254	0.0762712	0.00847458	0.0146288
	rs1949429	C	G	119	0.735294	0.264706	0.554622	0.361345	0.0840336	0.0385804
	rs1950572	A	G	119	0.512605	0.487395	0.260504	0.504202	0.235294	0.0105511
	rs1954728	A	G	119	0.789916	0.210084	0.647059	0.285714	0.0672269	0.0247164
	rs1962423	T	A	119	0.609244	0.390756	0.394958	0.428571	0.176471	0.0403203
	rs1965907	C	T	119	0.714286	0.285714	0.495798	0.436975	0.0672269	0.0149889
	rs1978309	G	C	118	0.538136	0.461864	0.288136	0.5	0.211864	0.0466011
	rs1978944	G	A	119	0.617647	0.382353	0.378151	0.478992	0.142857	0.0399318
	rs1992851	C	T	119	0.945378	0.0546218	0.89916	0.092437	0.00840336	0.0310921
	rs2007664	C	T	119	0.781513	0.218487	0.596639	0.369748	0.0336134	0.00161738
	rs2019203	C	A	119	0.697479	0.302521	0.504202	0.386555	0.109244	0.0056375
	rs202141	A	G	119	0.592437	0.407563	0.378151	0.428571	0.193277	0.00532922
	rs2024046	G	C	118	0.855932	0.144068	0.745763	0.220339	0.0338983	0.0361457
	rs2028157	C	T	119	0.781513	0.218487	0.613445	0.336134	0.0504202	0.00370016
	rs2030605	A	G	119	0.726891	0.273109	0.546218	0.361345	0.092437	0.0239424
	rs2031750	C	T	119	0.806723	0.193277	0.647059	0.319328	0.0336134	0.0216312
	rs2043818	G	C	119	0.558824	0.441176	0.336134	0.445378	0.218487	0.0440943
	rs2045418	C	T	119	0.768908	0.231092	0.605042	0.327731	0.0672269	0.00868846
	rs2047512	T	C	119	0.756303	0.243697	0.571429	0.369748	0.0588235	0.0187928
	rs2048607	G	A	119	0.617647	0.382353	0.420168	0.394958	0.184874	0.0399318
	rs2049218	G	A	118	0.648305	0.351695	0.457627	0.381356	0.161017	0.0368773
	rs2056194	C	G	119	0.668067	0.331933	0.462185	0.411765	0.12605	0.0331915
	rs2056290	C	T	119	0.689076	0.310924	0.453782	0.470588	0.0756303	0.0310315
	rs2057099	G	A	117	0.978632	0.0213675	0.974359	0.00854701	0.017094	0.0270145
	rs2061456	A	C	119	0.521008	0.478992	0.252101	0.537815	0.210084	0.0461882
	rs2062181	C	T	119	0.546218	0.453782	0.294118	0.504202	0.201681	0.0462719
	rs2062834	G	A	119	0.55042	0.44958	0.310924	0.478992	0.210084	0.0449087
	rs2077220	T	C	119	0.579832	0.420168	0.369748	0.420168	0.210084	0.00554274
	rs2077683	A	G	119	0.819328	0.180672	0.672269	0.294118	0.0336134	0.0344134
	rs2092982	A	C	119	0.852941	0.147059	0.722689	0.260504	0.0168067	0.0371899
	rs210011	C	T	119	0.584034	0.415966	0.512605	0.142857	0.344538	0.0423359
	rs2203837	A	G	118	0.936441	0.0635593	0.881356	0.110169	0.00847458	0.0473496
	rs221430	T	C	119	0.722689	0.277311	0.521008	0.403361	0.0756303	0.0247176
	rs223334	A	G	119	0.52521	0.47479	0.294118	0.462185	0.243697	0.0453448
	rs223383	A	G	119	0.529412	0.470588	0.294118	0.470588	0.235294	0.0308404
	rs2238114	C	A	119	0.542017	0.457983	0.268908	0.546218	0.184874	0.0191921
	rs2245939	G	A	119	0.651261	0.348739	0.478992	0.344538	0.176471	0.0133673
	rs228835	T	C	117	0.713675	0.286325	0.564103	0.299145	0.136752	0.014885
	rs230146	T	C	119	0.542017	0.457983	0.277311	0.529412	0.193277	0.048277
	rs237012	G	A	119	0.710084	0.289916	0.504202	0.411765	0.0840336	0.00238827
	rs243482	T	G	119	0.52521	0.47479	0.277311	0.495798	0.226891	0.0304046
	rs2872920	C	T	119	0.609244	0.390756	0.411765	0.394958	0.193277	0.00922204
	rs2961408	C	A	119	0.710084	0.289916	0.663866	0.092437	0.243697	0.0444492
	rs317845	C	T	119	0.714286	0.285714	0.521008	0.386555	0.092437	0.00953533
	rs334206	A	G	119	0.60084	0.39916	0.352941	0.495798	0.151261	0.0167946
	rs342941	C	T	119	0.60084	0.39916	0.369748	0.462185	0.168067	0.00164834
	rs348362	A	G	119	0.882353	0.117647	0.773109	0.218487	0.00840336	0.047452
	rs3856434	G	A	119	0.718487	0.281513	0.487395	0.462185	0.0504202	0.0260257
	rs38793	G	A	119	0.798319	0.201681	0.630252	0.336134	0.0336134	0.0219441
	rs398676	G	T	119	0.735294	0.264706	0.512605	0.445378	0.0420168	0.0385804
	rs402537	T	C	119	0.764706	0.235294	0.697479	0.134454	0.168067	0.0187534
	rs415	G	A	119	0.810924	0.189076	0.655462	0.310924	0.0336134	0.0348796
	rs4476030	T	G	119	0.5	0.5	0.310924	0.378151	0.310924	0.0454908
	rs463659	A	C	119	0.903361	0.0966387	0.815126	0.176471	0.00840336	0.00268351
	rs4658653	C	T	119	0.701681	0.298319	0.504202	0.394958	0.10084	0.0477552
	rs4714772	C	A	119	0.508403	0.491597	0.210084	0.596639	0.193277	0.0184415
	rs472579	G	C	119	0.693277	0.306723	0.504202	0.378151	0.117647	0.018361
	rs479062	T	G	119	0.596639	0.403361	0.327731	0.537815	0.134454	0.0442858
	rs4869	C	T	119	0.789916	0.210084	0.605042	0.369748	0.0252101	0.00717725
	rs518981	T	G	119	0.588235	0.411765	0.361345	0.453782	0.184874	0.0160366
	rs537111	G	A	119	0.886555	0.113445	0.848739	0.0756303	0.0756303	0.00239968
	rs550592	C	G	119	0.659664	0.340336	0.436975	0.445378	0.117647	0.0356223
	rs558565	A	C	118	0.559322	0.440678	0.305085	0.508475	0.186441	0.0292348
	rs590641	G	A	119	0.693277	0.306723	0.495798	0.394958	0.109244	0.010011
	rs591510	C	T	119	0.743697	0.256303	0.579832	0.327731	0.092437	0.0369728
	rs626333	A	G	119	0.714286	0.285714	0.512605	0.403361	0.0840336	0.0278763
	rs639297	C	T	119	0.533613	0.466387	0.277311	0.512605	0.210084	0.0295202
	rs6429691	G	C	119	0.60084	0.39916	0.378151	0.445378	0.176471	0.00269741
	rs648691	A	G	119	0.718487	0.281513	0.495798	0.445378	0.0588235	0.0442113
	rs6619	C	T	119	0.62605	0.37395	0.411765	0.428571	0.159664	0.0419438
	rs6677649	A	G	119	0.823529	0.176471	0.672269	0.302521	0.0252101	0.0342416
	rs698295	G	A	119	0.823529	0.176471	0.714286	0.218487	0.0672269	0.00357391
	rs700273	C	A	118	0.673729	0.326271	0.483051	0.381356	0.135593	0.0203971
	rs700917	G	A	119	0.508403	0.491597	0.243697	0.529412	0.226891	0.0184415
	rs705384	A	G	119	0.680672	0.319328	0.487395	0.386555	0.12605	0.0114549
	rs709209	A	G	119	0.621849	0.378151	0.378151	0.487395	0.134454	0.0406686
	rs710249	G	C	119	0.882353	0.117647	0.773109	0.218487	0.00840336	0.010763
	rs714070	G	A	119	0.764706	0.235294	0.705882	0.117647	0.176471	0.00477868
	rs717571	A	C	119	0.768908	0.231092	0.588235	0.361345	0.0504202	0.00483564
	rs719569	A	C	119	0.529412	0.470588	0.260504	0.537815	0.201681	0.0451413
	rs722064	A	G	119	0.798319	0.201681	0.630252	0.336134	0.0336134	0.00555923
	rs723898	A	G	119	0.613445	0.386555	0.352941	0.521008	0.12605	0.0269543
	rs726585	G	A	119	0.512605	0.487395	0.268908	0.487395	0.243697	0.0483798
	rs727811	A	C	119	0.773109	0.226891	0.596639	0.352941	0.0504202	0.0294054
	rs728431	C	G	119	0.768908	0.231092	0.596639	0.344538	0.0588235	0.019068
	rs728929	T	C	119	0.542017	0.457983	0.285714	0.512605	0.201681	0.0191921
	rs729397	C	G	119	0.852941	0.147059	0.714286	0.277311	0.00840336	0.0225502
	rs729454	C	T	119	0.609244	0.390756	0.352941	0.512605	0.134454	0.0265059
	rs7295	C	T	119	0.735294	0.264706	0.537815	0.394958	0.0672269	0.0239684
	rs735000	C	T	119	0.966387	0.0336134	0.941176	0.0504202	0.00840336	0.0199277
	rs738051	A	G	119	0.894958	0.105042	0.815126	0.159664	0.0252101	0.00531338
	rs7389	A	C	119	0.533613	0.466387	0.344538	0.378151	0.277311	0.0295202
	rs743111	C	T	119	0.57563	0.42437	0.352941	0.445378	0.201681	0.000790852
	rs744877	A	C	119	0.743697	0.256303	0.579832	0.327731	0.092437	0.0369728
	rs745232	T	G	119	0.701681	0.298319	0.512605	0.378151	0.109244	0.00917295
	rs747690	T	C	119	0.554622	0.445378	0.294118	0.521008	0.184874	0.0441834
	rs748325	T	A	119	0.789916	0.210084	0.621849	0.336134	0.0420168	0.0460566
	rs748856	C	T	119	0.638655	0.361345	0.394958	0.487395	0.117647	0.0134669
	rs749885	C	T	119	0.739496	0.260504	0.537815	0.403361	0.0588235	0.0374099
	rs751543	A	G	119	0.789916	0.210084	0.613445	0.352941	0.0336134	0.0460566
	rs752355	C	A	119	0.588235	0.411765	0.344538	0.487395	0.168067	0.0277088
	rs758643	C	T	119	0.52521	0.47479	0.285714	0.478992	0.235294	0.0453448
	rs763183	T	C	119	0.642857	0.357143	0.563025	0.159664	0.277311	0.00856532
	rs766117	A	G	119	0.567227	0.432773	0.504202	0.12605	0.369748	0.0458271
	rs766174	C	A	119	0.907563	0.092437	0.831933	0.151261	0.0168067	0.0309041
	rs774033	T	C	119	0.584034	0.415966	0.403361	0.361345	0.235294	0.0291084
	rs789231	C	T	119	0.542017	0.457983	0.294118	0.495798	0.210084	0.0191921
	rs798485	G	A	119	0.743697	0.256303	0.529412	0.428571	0.0420168	0.0369728
	rs801100	C	T	119	0.710084	0.289916	0.495798	0.428571	0.0756303	0.0296451
	rs8025557	C	T	118	0.631356	0.368644	0.423729	0.415254	0.161017	0.0146752
	rs803328	G	C	119	0.878151	0.121849	0.857143	0.0420168	0.10084	0.0106851
	rs816677	A	G	118	0.54661	0.45339	0.288136	0.516949	0.194915	0.0459569
	rs855743	T	C	119	0.659664	0.340336	0.462185	0.394958	0.142857	0.0356223
	rs868432	T	C	119	0.563025	0.436975	0.336134	0.453782	0.210084	0.0282866
	rs869874	G	A	119	0.827731	0.172269	0.663866	0.327731	0.00840336	0.00840055
	rs87061	G	T	119	0.504202	0.495798	0.226891	0.554622	0.218487	0.0458112
	rs872305	T	C	119	0.747899	0.252101	0.546218	0.403361	0.0504202	0.020751
	rs876358	C	T	119	0.563025	0.436975	0.285714	0.554622	0.159664	0.0282866
	rs879767	G	C	119	0.743697	0.256303	0.554622	0.378151	0.0672269	0.022474
	rs881997	C	T	119	0.777311	0.222689	0.605042	0.344538	0.0504202	0.00428812
	rs883843	C	T	119	0.579832	0.420168	0.336134	0.487395	0.176471	0.0100079
	rs884058	G	A	119	0.789916	0.210084	0.638655	0.302521	0.0588235	0.0247164
	rs894949	A	G	119	0.798319	0.201681	0.647059	0.302521	0.0504202	0.0422215
	rs897445	G	A	118	0.597458	0.402542	0.364407	0.466102	0.169492	0.0169368
	rs899333	G	A	118	0.673729	0.326271	0.457627	0.432203	0.110169	0.0285289
	rs899491	A	C	119	0.777311	0.222689	0.613445	0.327731	0.0588235	0.0479946
	rs905946	T	G	119	0.777311	0.222689	0.588235	0.378151	0.0336134	0.0479946
	rs906310	T	C	119	0.693277	0.306723	0.462185	0.462185	0.0756303	0.018361
	rs9093	T	C	119	0.579832	0.420168	0.319328	0.521008	0.159664	0.0429468
	rs910254	G	C	119	0.773109	0.226891	0.621849	0.302521	0.0756303	0.0294054
	rs913034	T	C	119	0.62605	0.37395	0.344538	0.563025	0.092437	0.0419438
	rs913275	A	G	119	0.588235	0.411765	0.361345	0.453782	0.184874	0.0277088
	rs916765	A	C	119	0.546218	0.453782	0.470588	0.151261	0.378151	0.0462719
	rs917915	T	C	119	0.819328	0.180672	0.663866	0.310924	0.0252101	0.0081994
	rs923811	T	G	119	0.705882	0.294118	0.470588	0.470588	0.0588235	0.0457179
	rs924935	T	C	119	0.735294	0.264706	0.563025	0.344538	0.092437	0.0385804
	rs927099	G	A	119	0.789916	0.210084	0.638655	0.302521	0.0588235	0.0247164
	rs927155	C	T	119	0.672269	0.327731	0.436975	0.470588	0.092437	0.00716116
	rs929648	C	A	119	0.785714	0.214286	0.630252	0.310924	0.0588235	0.0270572
	rs931625	C	G	119	0.676471	0.323529	0.478992	0.394958	0.12605	0.0331158
	rs938712	C	T	119	0.546218	0.453782	0.302521	0.487395	0.210084	0.0182835
	rs943036	A	G	119	0.634454	0.365546	0.436975	0.394958	0.168067	0.0140923
	rs948184	G	A	119	0.613445	0.386555	0.352941	0.521008	0.12605	0.0398161
	rs953135	C	T	119	0.676471	0.323529	0.470588	0.411765	0.117647	0.0196638
	rs956523	T	C	119	0.92437	0.0756303	0.857143	0.134454	0.00840336	0.0370363
	rs956596	G	A	119	0.752101	0.247899	0.554622	0.394958	0.0504202	0.00278774
	rs960450	T	C	119	0.630252	0.369748	0.411765	0.436975	0.151261	0.0396993
	rs966029	T	C	119	0.609244	0.390756	0.361345	0.495798	0.142857	0.0403203
	rs966446	A	G	118	0.512712	0.487288	0.423729	0.177966	0.398305	0.0482648
	rs966591	T	C	119	0.521008	0.478992	0.302521	0.436975	0.260504	0.0461882
	rs968483	A	G	119	0.638655	0.361345	0.428571	0.420168	0.151261	0.0244867
	rs970564	A	T	119	0.764706	0.235294	0.563025	0.403361	0.0336134	0.030929
	rs970973	C	T	119	0.516807	0.483193	0.268908	0.495798	0.235294	0.047674
	rs975232	G	A	119	0.542017	0.457983	0.302521	0.478992	0.218487	0.0283082
	rs980099	C	T	119	0.546218	0.453782	0.436975	0.218487	0.344538	0.0182835
	rs986692	A	G	119	0.705882	0.294118	0.495798	0.420168	0.0840336	0.0457179
	rs992769	A	G	119	0.756303	0.243697	0.579832	0.352941	0.0672269	0.0187928
	rs997500	T	C	119	0.659664	0.340336	0.462185	0.394958	0.142857	0.0356223
	rs997658	A	G	119	0.62605	0.37395	0.403361	0.445378	0.151261	0.0419438
	rs999918	G	C	119	0.894958	0.105042	0.798319	0.193277	0.00840336	0.01831
	rs1003095	A	G	119	0.89916	0.10084	0.806723	0.184874	0.00840336	0.0152229
	rs1017267	G	A	118	0.580508	0.419492	0.40678	0.347458	0.245763	0.0280392
	rs1021671	G	A	119	0.714286	0.285714	0.487395	0.453782	0.0588235	0.0439469
	rs1037748	T	A	119	0.777311	0.222689	0.605042	0.344538	0.0504202	0.0154227
	rs10444726	C	G	119	0.504202	0.495798	0.285714	0.436975	0.277311	0.0302312
	rs10785571	T	G	119	0.882353	0.117647	0.781513	0.201681	0.0168067	0.010763
	rs10798232	A	G	119	0.516807	0.483193	0.277311	0.478992	0.243697	0.047674
	rs10934861	C	T	119	0.558824	0.441176	0.294118	0.529412	0.176471	0.0295253
	rs10935774	A	G	119	0.743697	0.256303	0.588235	0.310924	0.10084	0.022474
	rs11076348	C	G	119	0.798319	0.201681	0.638655	0.319328	0.0420168	0.0422215
	rs11169992	C	T	119	0.529412	0.470588	0.319328	0.420168	0.260504	0.0115811
	rs1224	G	A	119	0.710084	0.289916	0.521008	0.378151	0.10084	0.0444492
	rs1258012	T	C	119	0.928571	0.0714286	0.865546	0.12605	0.00840336	0.000159587
	rs12587244	T	C	119	0.516807	0.483193	0.285714	0.462185	0.252101	0.0289095
	rs1290900	G	T	119	0.508403	0.491597	0.277311	0.462185	0.260504	0.00636044
	rs1335584	A	T	119	0.92437	0.0756303	0.890756	0.0672269	0.0420168	0.0370363
	rs1337567	T	C	119	0.655462	0.344538	0.596639	0.117647	0.285714	0.0377327
	rs1350067	T	G	119	0.827731	0.172269	0.689076	0.277311	0.0336134	0.00840055
	rs1350360	A	T	119	0.722689	0.277311	0.554622	0.336134	0.109244	0.00781001
	rs1377416	G	A	119	0.802521	0.197479	0.655462	0.294118	0.0504202	0.00510011
	rs1410914	T	G	118	0.690678	0.309322	0.457627	0.466102	0.0762712	0.0303053
	rs1423857	A	T	119	0.697479	0.302521	0.487395	0.420168	0.092437	0.00946586
	rs1442809	T	G	119	0.508403	0.491597	0.226891	0.563025	0.210084	0.0467732
	rs1444899	G	C	118	0.508475	0.491525	0.254237	0.508475	0.237288	0.0291829
	rs1497397	A	C	119	0.810924	0.189076	0.655462	0.310924	0.0336134	0.0217839
	rs1501656	G	T	119	0.781513	0.218487	0.638655	0.285714	0.0756303	0.00811131
	rs1521133	C	T	119	0.743697	0.256303	0.521008	0.445378	0.0336134	0.000269814
	rs1521247	G	C	118	0.758475	0.241525	0.559322	0.398305	0.0423729	0.00287369
	rs1535704	A	T	119	0.680672	0.319328	0.453782	0.453782	0.092437	0.00597713
	rs1559903	A	G	116	0.538793	0.461207	0.293103	0.491379	0.215517	0.0182254
	rs1559992	A	G	118	0.860169	0.139831	0.754237	0.211864	0.0338983	0.0358413
	rs1560166	T	G	117	0.555556	0.444444	0.290598	0.529915	0.179487	0.00349673
	rs1561585	T	G	119	0.57563	0.42437	0.361345	0.428571	0.210084	0.0441888
	rs1582197	C	T	119	0.651261	0.348739	0.546218	0.210084	0.243697	0.00728749
	rs1595625	G	A	118	0.584746	0.415254	0.338983	0.491525	0.169492	0.0421401
	rs1598460	C	T	118	0.830508	0.169492	0.694915	0.271186	0.0338983	0.013698
	rs1600151	C	T	119	0.777311	0.222689	0.596639	0.361345	0.0420168	0.0479946
	rs1616169	T	C	119	0.563025	0.436975	0.310924	0.504202	0.184874	0.0282866
	rs16817	C	G	119	0.777311	0.222689	0.605042	0.344538	0.0504202	0.0154227
	rs178704	C	T	119	0.642857	0.357143	0.563025	0.159664	0.277311	0.00856532
	rs180160	T	C	119	0.52521	0.47479	0.285714	0.478992	0.235294	0.0017885
	rs1862645	G	C	118	0.542373	0.457627	0.305085	0.474576	0.220339	0.0158737
	rs1864921	T	G	119	0.642857	0.357143	0.394958	0.495798	0.109244	0.00405448
	rs1868140	G	T	116	0.668103	0.331897	0.603448	0.12931	0.267241	0.0216949
	rs1886389	A	G	119	0.554622	0.445378	0.277311	0.554622	0.168067	0.0300315
	rs1906455	A	G	119	0.756303	0.243697	0.588235	0.336134	0.0756303	0.0187928
	rs1921660	A	G	119	0.844538	0.155462	0.705882	0.277311	0.0168067	0.0427921
	rs1921933	G	A	119	0.789916	0.210084	0.739496	0.10084	0.159664	0.0460566
	rs1936313	T	C	118	0.775424	0.224576	0.711864	0.127119	0.161017	0.0160015
	rs1936962	T	C	119	0.579832	0.420168	0.361345	0.436975	0.201681	0.00307832
	rs1945245	G	A	119	0.844538	0.155462	0.714286	0.260504	0.0252101	0.0427921
	rs198781	C	G	119	0.516807	0.483193	0.411765	0.210084	0.378151	0.047674
	rs1989981	G	C	119	0.680672	0.319328	0.579832	0.201681	0.218487	0.0339601
	rs1993969	T	C	117	0.867521	0.132479	0.82906	0.0769231	0.0940171	0.0248561
	rs2001046	T	G	119	0.689076	0.310924	0.613445	0.151261	0.235294	0.00548353
	rs2005463	G	A	119	0.588235	0.411765	0.504202	0.168067	0.327731	0.0277088
	rs2040499	C	G	119	0.789916	0.210084	0.630252	0.319328	0.0504202	0.0132576
	rs2044640	T	C	119	0.89916	0.10084	0.815126	0.168067	0.0168067	0.0152229
	rs2064034	C	T	119	0.777311	0.222689	0.722689	0.109244	0.168067	0.0296681
	rs2138537	C	G	119	0.663866	0.336134	0.428571	0.470588	0.10084	0.0067929
	rs2151224	A	G	119	0.567227	0.432773	0.319328	0.495798	0.184874	0.00598979
	rs2154175	G	T	119	0.920168	0.0798319	0.848739	0.142857	0.00840336	0.0480909
	rs2255657	G	C	118	0.533898	0.466102	0.305085	0.457627	0.237288	0.0454687
	rs226426	A	G	119	0.55042	0.44958	0.294118	0.512605	0.193277	0.0175192
	rs2272019	G	T	118	0.741525	0.258475	0.516949	0.449153	0.0338983	0.000155141
	rs2275003	T	C	118	0.745763	0.254237	0.567797	0.355932	0.0762712	0.0214668
	rs2341242	A	C	119	0.920168	0.0798319	0.848739	0.142857	0.00840336	0.0480909
	rs2356370	T	C	119	0.844538	0.155462	0.722689	0.243697	0.0336134	0.0427921
	rs2388067	G	T	114	0.824561	0.175439	0.675439	0.298246	0.0263158	0.0249621
	rs2451175	G	A	119	0.735294	0.264706	0.529412	0.411765	0.0588235	0.012876
	rs2470885	C	T	119	0.836134	0.163866	0.705882	0.260504	0.0336134	0.0135738
	rs2476600	A	G	118	0.805085	0.194915	0.677966	0.254237	0.0677966	0.0182883
	rs2497219	G	A	119	0.920168	0.0798319	0.848739	0.142857	0.00840336	0.0480909
	rs259686	T	C	119	0.886555	0.113445	0.789916	0.193277	0.0168067	0.00964375
	rs2688614	C	T	119	0.87395	0.12605	0.773109	0.201681	0.0252101	0.0111434
	rs2842527	T	C	119	0.886555	0.113445	0.789916	0.193277	0.0168067	0.00964375
	rs2928345	T	C	118	0.838983	0.161017	0.720339	0.237288	0.0423729	0.00210096
	rs2977013	A	G	119	0.62605	0.37395	0.344538	0.563025	0.092437	0.0419438
	rs2996028	G	A	119	0.55042	0.44958	0.310924	0.478992	0.210084	0.0449087
	rs3017719	A	G	119	0.571429	0.428571	0.327731	0.487395	0.184874	0.00973186
	rs305179	G	C	118	0.521186	0.478814	0.271186	0.5	0.228814	0.0459773
	rs3765874	T	G	118	0.826271	0.173729	0.677966	0.29661	0.0254237	0.0134204
	rs413666	T	C	119	0.516807	0.483193	0.277311	0.478992	0.243697	0.047674
	rs417774	T	C	119	0.861345	0.138655	0.731092	0.260504	0.00840336	0.0160036
	rs4284079	G	A	119	0.810924	0.189076	0.663866	0.294118	0.0420168	0.0348796
	rs4287168	G	C	119	0.542017	0.457983	0.294118	0.495798	0.210084	0.048277
	rs436227	T	C	119	0.5	0.5	0.268908	0.462185	0.268908	0.0454908
	rs4481842	A	G	119	0.621849	0.378151	0.420168	0.403361	0.176471	0.0243501
	rs4608765	T	C	119	0.571429	0.428571	0.327731	0.487395	0.184874	0.0460656
	rs4610907	T	C	119	0.533613	0.466387	0.453782	0.159664	0.386555	0.0455775
	rs463973	T	C	119	0.802521	0.197479	0.647059	0.310924	0.0420168	0.0388778
	rs4678951	C	A	117	0.551282	0.448718	0.264957	0.57265	0.162393	0.0172358
	rs4712827	T	C	119	0.844538	0.155462	0.697479	0.294118	0.00840336	0.0427921
	rs4736226	G	A	119	0.521008	0.478992	0.260504	0.521008	0.218487	0.0107932
	rs473880	T	C	119	0.52521	0.47479	0.294118	0.462185	0.243697	0.0304046
	rs4758192	C	G	118	0.737288	0.262712	0.533898	0.40678	0.059322	0.0123862
	rs476774	G	T	119	0.878151	0.121849	0.857143	0.0420168	0.10084	0.0106851
	rs4899198	A	G	119	0.516807	0.483193	0.285714	0.462185	0.252101	0.0289095
	rs494	G	A	119	0.554622	0.445378	0.327731	0.453782	0.218487	0.0300315
	rs561894	G	A	119	0.613445	0.386555	0.394958	0.436975	0.168067	0.0269543
	rs579813	C	T	119	0.781513	0.218487	0.638655	0.285714	0.0756303	0.046398
	rs5943779	T	C	117	0.504274	0.495726	0.42735	0.153846	0.418803	0.00179113
	rs5954131	T	C	118	0.707627	0.292373	0.644068	0.127119	0.228814	0.0449373
	rs6469727	C	G	119	0.508403	0.491597	0.277311	0.462185	0.260504	0.0184415
	rs6496310	G	T	111	0.662162	0.337838	0.414414	0.495495	0.0900901	0.0249515
	rs6496318	T	C	119	0.857143	0.142857	0.764706	0.184874	0.0504202	0.0360815
	rs650886	G	A	119	0.638655	0.361345	0.554622	0.168067	0.277311	0.0134669
	rs6526475	G	T	119	0.567227	0.432773	0.495798	0.142857	0.361345	0.000423658
	rs65671	G	A	116	0.543103	0.456897	0.310345	0.465517	0.224138	0.047202
	rs6713479	G	T	119	0.655462	0.344538	0.445378	0.420168	0.134454	0.0377327
	rs674457	G	C	119	0.752101	0.247899	0.563025	0.378151	0.0588235	0.0116296
	rs6766256	G	T	119	0.609244	0.390756	0.369748	0.478992	0.151261	0.0403203
	rs6767232	C	G	119	0.655462	0.344538	0.445378	0.420168	0.134454	0.0139222
	rs703829	T	C	119	0.584034	0.415966	0.403361	0.361345	0.235294	0.0291084
	rs717193	G	A	119	0.777311	0.222689	0.722689	0.109244	0.168067	0.0296681
	rs7196505	C	T	119	0.563025	0.436975	0.361345	0.403361	0.235294	0.0446415
	rs721422	G	A	119	0.676471	0.323529	0.596639	0.159664	0.243697	0.0196638
	rs721992	G	T	119	0.642857	0.357143	0.420168	0.445378	0.134454	0.0241556
	rs728282	C	T	119	0.588235	0.411765	0.302521	0.571429	0.12605	0.00526249
	rs734543	T	C	119	0.542017	0.457983	0.436975	0.210084	0.352941	0.0191921
	rs741402	T	C	119	0.798319	0.201681	0.621849	0.352941	0.0252101	0.0422215
	rs742779	C	T	119	0.865546	0.134454	0.747899	0.235294	0.0168067	0.00627779
	rs745318	C	T	119	0.739496	0.260504	0.537815	0.403361	0.0588235	0.0374099
	rs7473053	C	T	119	0.777311	0.222689	0.722689	0.109244	0.168067	0.0479946
	rs747396	C	T	119	0.52521	0.47479	0.277311	0.495798	0.226891	0.0453448
	rs7561934	G	A	119	0.705882	0.294118	0.495798	0.420168	0.0840336	0.0163407
	rs7622230	C	G	118	0.567797	0.432203	0.271186	0.59322	0.135593	0.0458773
	rs7631448	C	T	119	0.735294	0.264706	0.537815	0.394958	0.0672269	0.0239684
	rs767707	G	A	119	0.542017	0.457983	0.294118	0.495798	0.210084	0.048277
	rs768221	C	T	119	0.542017	0.457983	0.277311	0.529412	0.193277	0.048277
	rs7730639	G	C	118	0.525424	0.474576	0.29661	0.457627	0.245763	0.0303458
	rs776360	C	A	118	0.813559	0.186441	0.644068	0.338983	0.0169492	0.0342198
	rs7783339	T	A	119	0.62605	0.37395	0.394958	0.462185	0.142857	0.00811677
	rs7851353	G	A	119	0.630252	0.369748	0.386555	0.487395	0.12605	0.00501744
	rs793777	C	G	119	0.705882	0.294118	0.512605	0.386555	0.10084	0.0457179
	rs902957	A	G	119	0.697479	0.302521	0.462185	0.470588	0.0672269	0.0287896
	rs9400554	T	C	119	0.584034	0.415966	0.310924	0.546218	0.142857	0.0104773
	rs943035	A	G	119	0.634454	0.365546	0.436975	0.394958	0.168067	0.0140923
	rs946125	T	C	119	0.815126	0.184874	0.655462	0.319328	0.0252101	0.0342067
	rs950047	G	A	119	0.907563	0.092437	0.831933	0.151261	0.0168067	0.0309041
	rs954958	C	T	119	0.571429	0.428571	0.487395	0.168067	0.344538	0.0460656
	rs955056	T	C	119	0.743697	0.256303	0.554622	0.378151	0.0672269	0.022474
	rs962092	T	C	119	0.655462	0.344538	0.436975	0.436975	0.12605	0.00693893
	rs962272	G	A	119	0.676471	0.323529	0.478992	0.394958	0.12605	0.000766494
	rs975262	G	A	119	0.537815	0.462185	0.277311	0.521008	0.201681	0.0466549
	rs9861291	G	C	119	0.903361	0.0966387	0.823529	0.159664	0.0168067	0.0301902
	rs9939450	C	T	119	0.512605	0.487395	0.252101	0.521008	0.226891	0.0483798
	rs994127	T	C	119	0.62605	0.37395	0.344538	0.563025	0.092437	0.0419438
	rs997219	T	C	119	0.680672	0.319328	0.478992	0.403361	0.117647	0.0114549
	rs1001441	G	A	119	0.638655	0.361345	0.403361	0.470588	0.12605	0.0134669
	rs10160116	G	A	119	0.579832	0.420168	0.327731	0.504202	0.168067	0.0429468
	rs10421748	C	T	118	0.559322	0.440678	0.322034	0.474576	0.20339	0.0292348
	rs1042917	G	A	119	0.571429	0.428571	0.352941	0.436975	0.210084	0.0460656
	rs1044280	G	T	119	0.785714	0.214286	0.621849	0.327731	0.0504202	0.0457512
	rs10455	G	A	119	0.663866	0.336134	0.462185	0.403361	0.134454	0.0121371
	rs1049296	C	T	119	0.731092	0.268908	0.563025	0.336134	0.10084	0.0404884
	rs10502001	C	T	119	0.810924	0.189076	0.663866	0.294118	0.0420168	0.0217839
	rs10502151	T	C	119	0.680672	0.319328	0.495798	0.369748	0.134454	0.0339601
	rs10512472	T	C	119	0.630252	0.369748	0.403361	0.453782	0.142857	0.00501744
	rs10516782	A	G	119	0.579832	0.420168	0.336134	0.487395	0.176471	0.02801
	rs10518205	G	A	119	0.785714	0.214286	0.630252	0.310924	0.0588235	0.0270572
	rs1052420	G	A	119	0.861345	0.138655	0.747899	0.226891	0.0252101	0.0360958
	rs1053966	C	G	119	0.802521	0.197479	0.647059	0.310924	0.0420168	0.0214842
	rs1055935	C	G	119	0.605042	0.394958	0.403361	0.403361	0.193277	0.015803
	rs1057027	A	C	119	0.756303	0.243697	0.563025	0.386555	0.0504202	0.0352229
	rs1057028	A	T	119	0.756303	0.243697	0.563025	0.386555	0.0504202	0.0352229
	rs1057091	C	T	119	0.659664	0.340336	0.462185	0.394958	0.142857	0.0210071
	rs1057994	G	A	119	0.794118	0.205882	0.647059	0.294118	0.0588235	0.0133632
	rs1059369	A	T	119	0.689076	0.310924	0.470588	0.436975	0.092437	0.0108169
	rs1065489	G	T	119	0.504202	0.495798	0.268908	0.470588	0.260504	0.0302312
	rs10735810	G	A	119	0.621849	0.378151	0.386555	0.470588	0.142857	0.00473429
	rs10771894	A	G	119	0.684874	0.315126	0.462185	0.445378	0.092437	0.0330106
	rs10790610	T	C	119	0.663866	0.336134	0.453782	0.420168	0.12605	0.0341108
	rs10791961	C	G	119	0.844538	0.155462	0.714286	0.260504	0.0252101	0.0427921
	rs10843438	G	A	119	0.504202	0.495798	0.260504	0.487395	0.252101	0.0458112
	rs10853751	T	C	119	0.512605	0.487395	0.235294	0.554622	0.210084	0.0483798
	rs10857469	C	G	119	0.941176	0.0588235	0.890756	0.10084	0.00840336	0.0430232
	rs10857470	T	A	119	0.941176	0.0588235	0.890756	0.10084	0.00840336	0.0430232
	rs10891314	A	G	119	0.651261	0.348739	0.462185	0.378151	0.159664	0.0133673
	rs10936600	T	A	119	0.655462	0.344538	0.453782	0.403361	0.142857	0.0211538
	rs11101094	G	C	119	0.941176	0.0588235	0.890756	0.10084	0.00840336	0.0430232
	rs11119014	T	C	119	0.907563	0.092437	0.823529	0.168067	0.00840336	0.0309041
	rs11243011	A	G	119	0.680672	0.319328	0.495798	0.369748	0.134454	0.0339601
	rs1124427	C	G	119	0.831933	0.168067	0.680672	0.302521	0.0168067	0.0270685
	rs1129474	A	G	119	0.836134	0.163866	0.689076	0.294118	0.0168067	0.0247119
	rs1135045	C	G	119	0.630252	0.369748	0.369748	0.521008	0.109244	0.0150231
	rs11649280	A	G	119	0.672269	0.327731	0.428571	0.487395	0.0840336	0.0210027
	rs11782383	C	T	119	0.747899	0.252101	0.546218	0.403361	0.0504202	0.0114551
	rs1190736	C	A	119	0.676471	0.323529	0.621849	0.109244	0.268908	0.0331158
	rs1197682	G	A	119	0.848739	0.151261	0.731092	0.235294	0.0336134	0.0098332
	rs1197701	T	C	119	0.722689	0.277311	0.529412	0.386555	0.0840336	0.00781001
	rs1198849	G	A	119	0.596639	0.403361	0.369748	0.453782	0.176471	0.0168665
	rs1217401	A	G	119	0.869748	0.130252	0.764706	0.210084	0.0252101	0.0301036
	rs12288277	G	C	117	0.636752	0.363248	0.401709	0.470085	0.128205	0.00166371
	rs1230345	C	A	119	0.705882	0.294118	0.487395	0.436975	0.0756303	0.00912671
	rs12669721	G	T	119	0.785714	0.214286	0.647059	0.277311	0.0756303	0.0457512
	rs130067	A	C	119	0.693277	0.306723	0.478992	0.428571	0.092437	0.0296271
	rs1318743	T	C	119	0.62605	0.37395	0.369748	0.512605	0.117647	0.0419438
	rs1321	A	G	119	0.857143	0.142857	0.731092	0.252101	0.0168067	0.0360815
	rs13815	G	C	119	0.546218	0.453782	0.302521	0.487395	0.210084	0.0182835
	rs1422645	G	C	119	0.789916	0.210084	0.630252	0.319328	0.0504202	0.0247164
	rs1428553	C	T	119	0.701681	0.298319	0.487395	0.428571	0.0840336	0.0285139
	rs1428554	T	C	119	0.701681	0.298319	0.487395	0.428571	0.0840336	0.0285139
	rs1453541	A	G	119	0.756303	0.243697	0.588235	0.336134	0.0756303	0.0187928
	rs1484873	G	A	119	0.785714	0.214286	0.647059	0.277311	0.0756303	0.00326902
	rs1494558	A	G	119	0.537815	0.462185	0.336134	0.403361	0.260504	0.0466549
	rs15251	C	T	119	0.831933	0.168067	0.697479	0.268908	0.0336134	0.0136356
	rs1550116	A	G	119	0.802521	0.197479	0.655462	0.294118	0.0504202	0.0388778
	rs1569767	G	A	119	0.504202	0.495798	0.243697	0.521008	0.235294	0.0458112
	rs16495	C	T	119	0.731092	0.268908	0.512605	0.436975	0.0504202	0.0404884
	rs2057413	A	G	119	0.932773	0.0672269	0.87395	0.117647	0.00840336	0.0202414
	rs2068061	C	T	119	0.62605	0.37395	0.378151	0.495798	0.12605	0.0419438
	rs2070065	C	G	119	0.857143	0.142857	0.739496	0.235294	0.0252101	0.0360815
	rs2070745	G	C	117	0.589744	0.410256	0.333333	0.512821	0.153846	0.0422034
	rs2071932	T	C	119	0.642857	0.357143	0.563025	0.159664	0.277311	0.00856532
	rs2073151	C	T	119	0.592437	0.407563	0.369748	0.445378	0.184874	0.0430036
	rs2073942	C	G	119	0.781513	0.218487	0.705882	0.151261	0.142857	0.0142774
	rs2073951	G	C	119	0.651261	0.348739	0.386555	0.529412	0.0840336	0.0217238
	rs2075090	G	A	117	0.846154	0.153846	0.726496	0.239316	0.034188	0.0108353
	rs2076212	C	A	119	0.89916	0.10084	0.806723	0.184874	0.00840336	0.0152229
	rs2076213	A	C	119	0.911765	0.0882353	0.831933	0.159664	0.00840336	0.0060017
	rs2112811	C	T	119	0.672269	0.327731	0.428571	0.487395	0.0840336	0.0210027
	rs214803	T	G	119	0.957983	0.0420168	0.92437	0.0672269	0.00840336	0.00865496
	rs224534	A	G	119	0.777311	0.222689	0.613445	0.327731	0.0588235	0.0296681
	rs2258689	T	C	119	0.542017	0.457983	0.302521	0.478992	0.218487	0.048277
	rs2267808	T	C	119	0.768908	0.231092	0.588235	0.361345	0.0504202	0.00214941
	rs2271704	C	T	119	0.705882	0.294118	0.495798	0.420168	0.0840336	0.0163407
	rs2274419	C	T	119	0.777311	0.222689	0.621849	0.310924	0.0672269	0.0479946
	rs2279105	C	T	119	0.693277	0.306723	0.478992	0.428571	0.092437	0.010011
	rs2282683	A	G	119	0.777311	0.222689	0.596639	0.361345	0.0420168	0.0479946
	rs2286711	C	T	119	0.680672	0.319328	0.453782	0.453782	0.092437	0.00597713
	rs2291725	C	T	119	0.676471	0.323529	0.478992	0.394958	0.12605	0.000766494
	rs2291738	A	G	119	0.558824	0.441176	0.369748	0.378151	0.252101	0.0440943
	rs2291739	C	T	119	0.563025	0.436975	0.378151	0.369748	0.252101	0.0446415
	rs2294120	C	T	119	0.764706	0.235294	0.588235	0.352941	0.0588235	0.0187534
	rs2295275	T	A	119	0.890756	0.109244	0.789916	0.201681	0.00840336	0.0363117
	rs2296441	G	A	119	0.57563	0.42437	0.310924	0.529412	0.159664	0.0172138
	rs2298553	C	T	118	0.614407	0.385593	0.398305	0.432203	0.169492	0.0396393
	rs2301283	T	G	119	0.819328	0.180672	0.689076	0.260504	0.0504202	0.0081994
	rs2302310	C	T	119	0.57563	0.42437	0.310924	0.529412	0.159664	0.0273809
	rs2302561	A	G	119	0.785714	0.214286	0.647059	0.277311	0.0756303	0.0270572
	rs2303436	A	G	119	0.651261	0.348739	0.462185	0.378151	0.159664	0.0133673
	rs2303650	C	A	119	0.844538	0.155462	0.722689	0.243697	0.0336134	0.0427921
	rs2303771	G	A	119	0.609244	0.390756	0.344538	0.529412	0.12605	0.0403203
	rs2304672	C	G	119	0.928571	0.0714286	0.865546	0.12605	0.00840336	0.0277918
	rs2305935	T	C	119	0.668067	0.331933	0.428571	0.478992	0.092437	0.0331915
	rs2336029	G	A	119	0.802521	0.197479	0.739496	0.12605	0.134454	0.0214842
	rs2348353	C	T	119	0.785714	0.214286	0.621849	0.327731	0.0504202	0.0457512
	rs2366926	A	G	119	0.55042	0.44958	0.285714	0.529412	0.184874	0.0105364
	rs2431363	T	C	119	0.802521	0.197479	0.647059	0.310924	0.0420168	0.0388778
	rs2472553	C	T	119	0.571429	0.428571	0.319328	0.504202	0.176471	0.0460656
	rs2584021	G	A	119	0.533613	0.466387	0.294118	0.478992	0.226891	0.0455775
	rs2616815	G	A	119	0.57563	0.42437	0.344538	0.462185	0.193277	0.0441888
	rs2666839	C	T	118	0.855932	0.144068	0.737288	0.237288	0.0254237	0.0361457
	rs273259	C	T	119	0.810924	0.189076	0.655462	0.310924	0.0336134	0.0217839
	rs2745098	T	C	119	0.647059	0.352941	0.428571	0.436975	0.134454	0.0227219
	rs2796450	T	C	118	0.923729	0.0762712	0.855932	0.135593	0.00847458	0.00690719
	rs2822573	A	G	119	0.680672	0.319328	0.428571	0.504202	0.0672269	0.0339601
	rs2822574	G	A	118	0.682203	0.317797	0.432203	0.5	0.0677966	0.0342839
	rs2822586	T	C	119	0.655462	0.344538	0.411765	0.487395	0.10084	0.0139222
	rs3021408	C	T	119	0.588235	0.411765	0.378151	0.420168	0.201681	0.0423546
	rs3087210	G	A	119	0.710084	0.289916	0.512605	0.394958	0.092437	0.0296451
	rs3130932	T	G	119	0.529412	0.470588	0.260504	0.537815	0.201681	0.0451413
	rs3192149	C	A	119	0.613445	0.386555	0.369748	0.487395	0.142857	0.0269543
	rs3213831	C	T	119	0.516807	0.483193	0.285714	0.462185	0.252101	0.0105579
	rs321775	T	C	119	0.642857	0.357143	0.411765	0.462185	0.12605	0.036646
	rs321776	C	T	119	0.651261	0.348739	0.428571	0.445378	0.12605	0.0376471
	rs324726	T	C	119	0.886555	0.113445	0.789916	0.193277	0.0168067	0.00239968
	rs36686	A	G	119	0.55042	0.44958	0.302521	0.495798	0.201681	0.0449087
	rs3732782	C	A	119	0.584034	0.415966	0.378151	0.411765	0.210084	0.0423359
	rs3734382	C	A	119	0.731092	0.268908	0.521008	0.420168	0.0588235	0.0404884
	rs3735422	G	C	119	0.701681	0.298319	0.470588	0.462185	0.0672269	0.0175853
	rs3738573	C	G	119	0.57563	0.42437	0.336134	0.478992	0.184874	0.0441888
	rs3746319	C	T	119	0.542017	0.457983	0.268908	0.546218	0.184874	0.048277
	rs3747295	T	C	119	0.52521	0.47479	0.420168	0.210084	0.369748	0.0177049
	rs3747965	T	G	119	0.554622	0.445378	0.294118	0.521008	0.184874	0.000216945
	rs3748697	A	G	119	0.89916	0.10084	0.806723	0.184874	0.00840336	0.00382161
	rs3750450	C	A	119	0.785714	0.214286	0.630252	0.310924	0.0588235	0.0457512
	rs3759299	G	C	119	0.781513	0.218487	0.613445	0.336134	0.0504202	0.0300604
	rs3759300	G	A	119	0.794118	0.205882	0.638655	0.310924	0.0504202	0.0230175
	rs3759302	A	T	118	0.745763	0.254237	0.567797	0.355932	0.0762712	0.00165179
	rs3795905	G	A	119	0.764706	0.235294	0.605042	0.319328	0.0756303	0.0187534
	rs3796100	A	T	119	0.798319	0.201681	0.663866	0.268908	0.0672269	0.0422215
	rs3796181	A	G	119	0.533613	0.466387	0.252101	0.563025	0.184874	0.0295202
	rs3806368	C	T	119	0.651261	0.348739	0.411765	0.478992	0.109244	0.0376471
	rs3807979	A	G	119	0.571429	0.428571	0.319328	0.504202	0.176471	0.0272174
	rs3811515	T	G	119	0.676471	0.323529	0.470588	0.411765	0.117647	0.0331158
	rs3811987	G	A	119	0.659664	0.340336	0.436975	0.445378	0.117647	0.0210071
	rs3816614	C	T	119	0.613445	0.386555	0.403361	0.420168	0.176471	0.0147761
	rs3818511	T	C	119	0.726891	0.273109	0.529412	0.394958	0.0756303	0.0431407
	rs4074536	C	T	119	0.529412	0.470588	0.285714	0.487395	0.226891	0.0308404
	rs40986	A	G	119	0.777311	0.222689	0.596639	0.361345	0.0420168	0.0296681
	rs4129190	A	G	119	0.781513	0.218487	0.588235	0.386555	0.0252101	0.00370016
	rs4239529	T	A	119	0.630252	0.369748	0.386555	0.487395	0.12605	0.0396993
	rs438034	C	T	119	0.890756	0.109244	0.789916	0.201681	0.00840336	0.00722906
	rs442800	C	T	119	0.546218	0.453782	0.294118	0.504202	0.201681	0.0182835
	rs446644	C	T	119	0.558824	0.441176	0.310924	0.495798	0.193277	0.0295253
	rs4494160	A	G	119	0.806723	0.193277	0.655462	0.302521	0.0420168	0.000837646
	rs4679392	A	G	119	0.743697	0.256303	0.537815	0.411765	0.0504202	0.022474
	rs475002	C	G	119	0.546218	0.453782	0.268908	0.554622	0.176471	0.0462719
	rs4803476	T	A	119	0.508403	0.491597	0.268908	0.478992	0.252101	0.0184415
	rs486907	G	A	119	0.747899	0.252101	0.596639	0.302521	0.10084	0.0114551
	rs4875	T	C	119	0.621849	0.378151	0.361345	0.521008	0.117647	0.0243501
	rs4908923	A	G	119	0.852941	0.147059	0.722689	0.260504	0.0168067	0.0371899
	rs4916685	C	T	119	0.55042	0.44958	0.285714	0.529412	0.184874	0.0105364
	rs4938016	G	C	119	0.584034	0.415966	0.361345	0.445378	0.193277	0.0423359
	rs4971007	G	T	119	0.92437	0.0756303	0.857143	0.134454	0.00840336	0.00930293
	rs4987411	T	C	119	0.592437	0.407563	0.369748	0.445378	0.184874	0.0430036
	rs521695	G	T	119	0.596639	0.403361	0.327731	0.537815	0.134454	0.0442858
	rs550510	A	G	119	0.630252	0.369748	0.386555	0.487395	0.12605	0.0150231
	rs564754	C	G	119	0.647059	0.352941	0.462185	0.369748	0.168067	0.0368427
	rs5931046	A	G	119	0.894958	0.105042	0.865546	0.0588235	0.0756303	0.0328829
	rs6015225	A	T	119	0.722689	0.277311	0.529412	0.386555	0.0840336	0.0452461
	rs6497671	C	T	119	0.651261	0.348739	0.386555	0.529412	0.0840336	0.0217238
	rs652921	C	T	119	0.52521	0.47479	0.285714	0.478992	0.235294	0.0017885
	rs6591536	A	G	119	0.705882	0.294118	0.512605	0.386555	0.10084	0.00239564
	rs663824	A	G	119	0.739496	0.260504	0.563025	0.352941	0.0840336	0.0247132
	rs6648942	T	G	119	0.794118	0.205882	0.747899	0.092437	0.159664	0.0464793
	rs6940	A	T	119	0.810924	0.189076	0.663866	0.294118	0.0420168	0.00928868
	rs6964587	G	T	119	0.810924	0.189076	0.655462	0.310924	0.0336134	0.0348796
	rs701865	A	T	119	0.533613	0.466387	0.277311	0.512605	0.210084	0.0295202
	rs7124407	G	C	119	0.655462	0.344538	0.462185	0.386555	0.151261	0.0139222
	rs7180279	A	G	119	0.957983	0.0420168	0.92437	0.0672269	0.00840336	0.0475241
	rs7211392	C	T	119	0.87395	0.12605	0.764706	0.218487	0.0168067	0.0257769
	rs7247504	T	C	119	0.710084	0.289916	0.512605	0.394958	0.092437	0.0296451
	rs726176	C	T	119	0.722689	0.277311	0.521008	0.403361	0.0756303	0.0247176
	rs7289	C	G	119	0.886555	0.113445	0.781513	0.210084	0.00840336	0.00964375
	rs734784	A	G	119	0.878151	0.121849	0.773109	0.210084	0.0168067	0.0106851
	rs7358408	C	T	119	0.655462	0.344538	0.453782	0.403361	0.142857	0.0377327
	rs7520453	G	C	119	0.878151	0.121849	0.773109	0.210084	0.0168067	0.0224482
	rs757081	G	C	119	0.701681	0.298319	0.495798	0.411765	0.092437	0.0175853
	rs7572392	A	C	119	0.857143	0.142857	0.739496	0.235294	0.0252101	0.0360815
	rs7574414	G	A	119	0.794118	0.205882	0.630252	0.327731	0.0420168	0.0464793
	rs7584376	G	T	118	0.860169	0.139831	0.745763	0.228814	0.0254237	0.0358413
	rs760998	T	C	119	0.537815	0.462185	0.302521	0.470588	0.226891	0.000920099
	rs7641243	T	C	119	0.760504	0.239496	0.563025	0.394958	0.0420168	0.0327248
	rs764631	T	C	119	0.836134	0.163866	0.789916	0.092437	0.117647	0.0135738
	rs774027	A	T	119	0.584034	0.415966	0.403361	0.361345	0.235294	0.0291084
	rs7797834	A	G	119	0.810924	0.189076	0.655462	0.310924	0.0336134	0.0348796
	rs7827132	A	G	119	0.840336	0.159664	0.705882	0.268908	0.0252101	0.0050219
	rs7861898	G	A	119	0.588235	0.411765	0.310924	0.554622	0.134454	0.0277088
	rs7877847	T	G	117	0.944444	0.0555556	0.923077	0.042735	0.034188	0.0332839
	rs820144	T	C	119	0.726891	0.273109	0.563025	0.327731	0.109244	0.0155347
	rs820150	T	C	119	0.798319	0.201681	0.672269	0.252101	0.0756303	0.0422215
	rs820151	G	A	119	0.798319	0.201681	0.672269	0.252101	0.0756303	0.0422215
	rs820152	T	C	119	0.798319	0.201681	0.672269	0.252101	0.0756303	0.0422215
	rs839763	A	G	119	0.87395	0.12605	0.756303	0.235294	0.00840336	0.0111434
	rs866484	G	C	119	0.726891	0.273109	0.537815	0.378151	0.0840336	0.0431407
	rs906303	G	A	118	0.919492	0.0805085	0.855932	0.127119	0.0169492	0.0137102
	rs910799	G	A	119	0.852941	0.147059	0.722689	0.260504	0.0168067	0.0371899
	rs913770	G	A	119	0.789916	0.210084	0.588235	0.403361	0.00840336	0.0132576
	rs9320526	A	G	119	0.554622	0.445378	0.319328	0.470588	0.210084	0.0441834
	rs9807047	A	G	117	0.65812	0.34188	0.435897	0.444444	0.119658	0.0208187
	rs9816693	G	C	119	0.92437	0.0756303	0.857143	0.134454	0.00840336	0.00183545
	rs9843784	T	G	119	0.815126	0.184874	0.689076	0.252101	0.0588235	0.0190339
	rs9984726	G	A	119	0.5	0.5	0.294118	0.411765	0.294118	0.0177672
	rs10037067	A	G	119	0.55042	0.44958	0.285714	0.529412	0.184874	0.0105364
	rs1040499	A	C	119	0.630252	0.369748	0.411765	0.436975	0.151261	0.0150231
	rs10405154	A	G	119	0.558824	0.441176	0.319328	0.478992	0.201681	0.0295253
	rs10413818	A	G	119	0.815126	0.184874	0.672269	0.285714	0.0420168	0.0190339
	rs10489823	C	A	119	0.710084	0.289916	0.512605	0.394958	0.092437	0.0296451
	rs10764749	C	T	119	0.823529	0.176471	0.680672	0.285714	0.0336134	0.0152674
	rs10788882	C	G	119	0.542017	0.457983	0.277311	0.529412	0.193277	0.0283082
	rs10896290	A	G	119	0.844538	0.155462	0.714286	0.260504	0.0252101	0.0427921
	rs1126933	C	G	119	0.571429	0.428571	0.302521	0.537815	0.159664	0.00185116
	rs1131167	G	C	119	0.546218	0.453782	0.268908	0.554622	0.176471	0.0462719
	rs1131824	C	T	119	0.747899	0.252101	0.563025	0.369748	0.0672269	0.0372685
	rs11770537	G	A	119	0.617647	0.382353	0.411765	0.411765	0.176471	0.00284205
	rs1217397	C	T	119	0.869748	0.130252	0.764706	0.210084	0.0252101	0.0301036
	rs12421329	G	T	119	0.840336	0.159664	0.714286	0.252101	0.0336134	0.0473077
	rs3800962	C	A	119	0.747899	0.252101	0.546218	0.403361	0.0504202	0.0114551
	rs12936135	T	C	119	0.886555	0.113445	0.789916	0.193277	0.0168067	0.041159
	rs1333973	T	A	119	0.810924	0.189076	0.655462	0.310924	0.0336134	0.0217839
	rs1414474	G	C	119	0.861345	0.138655	0.756303	0.210084	0.0336134	0.0360958
	rs1804027	T	C	119	0.798319	0.201681	0.630252	0.336134	0.0336134	0.0422215
	rs1905055	G	A	118	0.847458	0.152542	0.720339	0.254237	0.0254237	0.0401822
	rs2066964	C	G	119	0.521008	0.478992	0.310924	0.420168	0.268908	0.0294184
	rs2073152	G	C	119	0.810924	0.189076	0.689076	0.243697	0.0672269	0.0348796
	rs2073815	T	C	119	0.52521	0.47479	0.294118	0.462185	0.243697	0.0304046
	rs2074599	G	C	118	0.877119	0.122881	0.762712	0.228814	0.00847458	0.00482992
	rs2235624	G	A	119	0.512605	0.487395	0.302521	0.420168	0.277311	0.00673757
	rs2247114	A	G	119	0.508403	0.491597	0.294118	0.428571	0.277311	0.0293148
	rs2271900	G	A	119	0.747899	0.252101	0.546218	0.403361	0.0504202	0.0372685
	rs2287631	C	A	119	0.584034	0.415966	0.369748	0.428571	0.201681	0.0423359
	rs2288255	C	T	119	0.785714	0.214286	0.630252	0.310924	0.0588235	0.0270572
	rs2290207	G	A	119	0.579832	0.420168	0.294118	0.571429	0.134454	0.0164962
	rs2296840	T	C	119	0.529412	0.470588	0.243697	0.571429	0.184874	0.0451413
	rs2298803	T	C	119	0.802521	0.197479	0.655462	0.294118	0.0504202	0.01179
	rs2510044	G	A	119	0.613445	0.386555	0.403361	0.420168	0.176471	0.0398161
	rs2511188	T	C	119	0.596639	0.403361	0.386555	0.420168	0.193277	0.0168665
	rs254855	C	T	119	0.630252	0.369748	0.394958	0.470588	0.134454	0.0396993
	rs2667661	G	A	119	0.630252	0.369748	0.411765	0.436975	0.151261	0.0150231
	rs2782643	C	T	119	0.89916	0.10084	0.806723	0.184874	0.00840336	0.0308481
	rs3182634	T	C	119	0.760504	0.239496	0.571429	0.378151	0.0504202	0.018536
	rs3213729	C	G	119	0.836134	0.163866	0.689076	0.294118	0.0168067	0.00596928
	rs335524	T	C	119	0.903361	0.0966387	0.815126	0.176471	0.00840336	0.00268351
	rs3745277	G	A	119	0.945378	0.0546218	0.89916	0.092437	0.00840336	0.0310921
	rs3746471	G	A	119	0.512605	0.487395	0.277311	0.470588	0.252101	0.00204364
	rs3764647	A	G	118	0.936441	0.0635593	0.881356	0.110169	0.00847458	0.0148408
	rs3795737	T	C	119	0.894958	0.105042	0.815126	0.159664	0.0252101	0.00116959
	rs3810450	A	G	119	0.794118	0.205882	0.630252	0.327731	0.0420168	0.0464793
	rs4504745	A	G	119	0.638655	0.361345	0.436975	0.403361	0.159664	0.00425039
	rs472144	A	G	119	0.647059	0.352941	0.462185	0.369748	0.168067	0.0368427
	rs4867984	A	G	119	0.882353	0.117647	0.798319	0.168067	0.0336134	0.047452
	rs4897743	T	G	119	0.554622	0.445378	0.302521	0.504202	0.193277	0.0300315
	rs4897781	G	A	119	0.554622	0.445378	0.302521	0.504202	0.193277	0.0300315
	rs4897783	G	A	119	0.554622	0.445378	0.302521	0.504202	0.193277	0.0300315
	rs5896	T	C	119	0.605042	0.394958	0.394958	0.420168	0.184874	0.015803
	rs600753	C	T	119	0.705882	0.294118	0.512605	0.386555	0.10084	0.00912671
	rs6797429	C	G	118	0.508475	0.491525	0.20339	0.610169	0.186441	0.0254969
	rs6809649	T	C	119	0.92437	0.0756303	0.857143	0.134454	0.00840336	0.00183545
	rs7098669	C	T	119	0.529412	0.470588	0.302521	0.453782	0.243697	0.0451413
	rs7187920	T	C	119	0.630252	0.369748	0.361345	0.537815	0.10084	0.0396993
	rs731170	G	A	118	0.766949	0.233051	0.618644	0.29661	0.0847458	0.0301299
	rs740250	C	T	119	0.836134	0.163866	0.680672	0.310924	0.00840336	0.0135738
	rs7965277	T	G	119	0.915966	0.0840336	0.840336	0.151261	0.00840336	0.0178801
	rs876755	T	C	119	0.542017	0.457983	0.294118	0.495798	0.210084	0.0191921
	rs880316	C	T	119	0.773109	0.226891	0.596639	0.352941	0.0504202	0.0170127
	rs897471	T	C	119	0.878151	0.121849	0.764706	0.226891	0.00840336	0.0224482
	rs960193	C	A	119	0.844538	0.155462	0.714286	0.260504	0.0252101	0.0427921
	rs9658625	A	G	119	0.806723	0.193277	0.655462	0.302521	0.0420168	0.0216312
	rs9853906	G	A	119	0.722689	0.277311	0.537815	0.369748	0.092437	0.0452461
	rs1015995	G	C	119	0.617647	0.382353	0.403361	0.428571	0.168067	0.0254253
	rs10228334	C	T	119	0.810924	0.189076	0.655462	0.310924	0.0336134	0.0348796
	rs10361	G	C	119	0.722689	0.277311	0.546218	0.352941	0.10084	0.00781001
	rs1037590	C	A	119	0.62605	0.37395	0.403361	0.445378	0.151261	0.00811677
	rs1043031	G	A	119	0.642857	0.357143	0.563025	0.159664	0.277311	0.00856532
	rs1043192	C	A	119	0.542017	0.457983	0.302521	0.478992	0.218487	0.0191921
	rs1045523	C	T	119	0.865546	0.134454	0.739496	0.252101	0.00840336	0.0354756
	rs1046623	T	C	119	0.57563	0.42437	0.336134	0.478992	0.184874	0.00589481
	rs1047383	T	C	119	0.504202	0.495798	0.226891	0.554622	0.218487	0.000462165
	rs1048675	A	G	119	0.672269	0.327731	0.436975	0.470588	0.092437	0.0210027
	rs1048807	T	C	119	0.840336	0.159664	0.714286	0.252101	0.0336134	0.0231421
	rs10497434	T	C	119	0.789916	0.210084	0.647059	0.285714	0.0672269	0.0460566
	rs1050274	G	A	119	0.663866	0.336134	0.453782	0.420168	0.12605	0.0341108
	rs1050951	G	A	119	0.726891	0.273109	0.571429	0.310924	0.117647	0.00421769
	rs1051756	C	T	119	0.533613	0.466387	0.294118	0.478992	0.226891	0.0295202
	rs10518208	G	A	119	0.777311	0.222689	0.630252	0.294118	0.0756303	0.0479946
	rs1053932	C	T	119	0.537815	0.462185	0.302521	0.470588	0.226891	0.000920099
	rs1056740	C	T	119	0.697479	0.302521	0.495798	0.403361	0.10084	0.01903
	rs1058486	G	A	119	0.563025	0.436975	0.285714	0.554622	0.159664	0.0103365
	rs1059360	T	C	119	0.605042	0.394958	0.378151	0.453782	0.168067	0.0052902
	rs1064835	A	G	119	0.852941	0.147059	0.722689	0.260504	0.0168067	0.0371899
	rs1065403	G	A	119	0.613445	0.386555	0.352941	0.521008	0.12605	0.0147761
	rs1124175	G	T	119	0.630252	0.369748	0.386555	0.487395	0.12605	0.0396993
	rs1130864	C	T	119	0.928571	0.0714286	0.865546	0.12605	0.00840336	0.0277918
	rs1199332	C	G	119	0.802521	0.197479	0.647059	0.310924	0.0420168	0.0388778
	rs12072	G	A	119	0.701681	0.298319	0.512605	0.378151	0.109244	0.0477552
	rs12740	A	G	119	0.798319	0.201681	0.630252	0.336134	0.0336134	0.0219441
	rs1285582	A	G	119	0.546218	0.453782	0.436975	0.218487	0.344538	0.0182835
	rs1285590	G	A	119	0.546218	0.453782	0.436975	0.218487	0.344538	0.0182835
	rs1318481	T	G	119	0.617647	0.382353	0.411765	0.411765	0.176471	0.0147305
	rs13503	C	A	119	0.529412	0.470588	0.260504	0.537815	0.201681	0.0451413
	rs137085	C	T	119	0.735294	0.264706	0.537815	0.394958	0.0672269	0.0385804
	rs13835	G	T	119	0.907563	0.092437	0.823529	0.168067	0.00840336	0.00838285
	rs13942	T	C	119	0.945378	0.0546218	0.92437	0.0420168	0.0336134	0.0310921
	rs1495660	T	C	119	0.579832	0.420168	0.319328	0.521008	0.159664	0.0164962
	rs1495963	G	A	119	0.743697	0.256303	0.563025	0.361345	0.0756303	0.00302623
	rs15049	A	C	119	0.651261	0.348739	0.411765	0.478992	0.109244	0.0376471
	rs15232	C	T	119	0.823529	0.176471	0.672269	0.302521	0.0252101	0.0152674
	rs1555319	C	G	115	0.730435	0.269565	0.547826	0.365217	0.0869565	0.00948625
	rs15563	C	T	119	0.676471	0.323529	0.478992	0.394958	0.12605	0.000766494
	rs15734	G	A	119	0.806723	0.193277	0.663866	0.285714	0.0504202	0.0364342
	rs1805126	T	C	116	0.517241	0.482759	0.293103	0.448276	0.258621	0.00647226
	rs1871946	G	A	119	0.710084	0.289916	0.478992	0.462185	0.0588235	0.0444492
	rs1874396	A	C	119	0.743697	0.256303	0.563025	0.361345	0.0756303	0.00302623
	rs2010314	T	G	119	0.689076	0.310924	0.478992	0.420168	0.10084	0.0180895
	rs2010315	A	G	119	0.689076	0.310924	0.478992	0.420168	0.10084	0.0180895
	rs221152	A	G	119	0.533613	0.466387	0.294118	0.478992	0.226891	0.0177744
	rs221153	G	C	118	0.533898	0.466102	0.29661	0.474576	0.228814	0.0177156
	rs2218404	G	T	119	0.785714	0.214286	0.638655	0.294118	0.0672269	0.00159956
	rs2226955	A	G	119	0.542017	0.457983	0.268908	0.546218	0.184874	0.0191921
	rs2227276	G	A	118	0.572034	0.427966	0.313559	0.516949	0.169492	0.0180079
	rs223418	A	C	119	0.529412	0.470588	0.294118	0.470588	0.235294	0.0308404
	rs2248013	C	A	119	0.647059	0.352941	0.445378	0.403361	0.151261	0.0368427
	rs2250122	G	T	119	0.714286	0.285714	0.512605	0.403361	0.0840336	0.0439469
	rs2254886	C	A	119	0.789916	0.210084	0.739496	0.10084	0.159664	0.00717725
	rs2254916	A	T	117	0.653846	0.346154	0.444444	0.418803	0.136752	0.0211271
	rs2269850	C	T	119	0.739496	0.260504	0.554622	0.369748	0.0756303	0.0120719
	rs2273528	A	G	119	0.894958	0.105042	0.806723	0.176471	0.0168067	0.01831
	rs2274588	C	G	119	0.516807	0.483193	0.310924	0.411765	0.277311	0.0189822
	rs2278764	G	A	119	0.794118	0.205882	0.655462	0.277311	0.0672269	0.0464793
	rs1895807	G	A	119	0.689076	0.310924	0.453782	0.470588	0.0756303	0.0108169
	rs2285762	G	A	119	0.739496	0.260504	0.554622	0.369748	0.0756303	0.0120719
	rs2285764	G	A	119	0.739496	0.260504	0.554622	0.369748	0.0756303	0.0120719
	rs2289490	T	C	119	0.655462	0.344538	0.428571	0.453782	0.117647	0.0211538
	rs2289566	G	A	119	0.886555	0.113445	0.798319	0.176471	0.0252101	0.041159
	rs2291562	C	T	119	0.714286	0.285714	0.495798	0.436975	0.0672269	0.0278763
	rs2293250	C	T	119	0.546218	0.453782	0.260504	0.571429	0.168067	0.0182835
	rs2293783	T	C	119	0.777311	0.222689	0.605042	0.344538	0.0504202	0.0154227
	rs2294967	C	T	119	0.651261	0.348739	0.462185	0.378151	0.159664	0.0376471
	rs2296055	G	A	119	0.57563	0.42437	0.369748	0.411765	0.218487	0.0441888
	rs2296408	T	G	119	0.638655	0.361345	0.411765	0.453782	0.134454	0.0244867
	rs2296613	T	C	119	0.651261	0.348739	0.428571	0.445378	0.12605	0.00401701
	rs2298552	T	C	119	0.533613	0.466387	0.294118	0.478992	0.226891	0.0295202
	rs2303463	C	T	118	0.682203	0.317797	0.474576	0.415254	0.110169	0.0342839
	rs2304269	T	C	119	0.584034	0.415966	0.336134	0.495798	0.168067	0.0423359
	rs2304859	T	C	119	0.605042	0.394958	0.344538	0.521008	0.134454	0.0052902
	rs2341985	T	C	119	0.789916	0.210084	0.655462	0.268908	0.0756303	0.00165467
	rs2401809	G	A	119	0.857143	0.142857	0.756303	0.201681	0.0420168	0.0360815
	rs2427444	T	C	119	0.903361	0.0966387	0.815126	0.176471	0.00840336	0.0114225
	rs2433149	C	G	119	0.659664	0.340336	0.462185	0.394958	0.142857	0.0210071
	rs2450137	G	C	119	0.609244	0.390756	0.394958	0.428571	0.176471	0.0265059
	rs2470549	T	C	119	0.596639	0.403361	0.361345	0.470588	0.168067	0.0258572
	rs250404	T	C	119	0.567227	0.432773	0.344538	0.445378	0.210084	0.0458271
	rs2526935	G	T	119	0.789916	0.210084	0.621849	0.336134	0.0420168	0.0460566
	rs2542939	T	C	115	0.665217	0.334783	0.469565	0.391304	0.13913	0.0116593
	rs2586038	T	G	119	0.680672	0.319328	0.445378	0.470588	0.0840336	0.0114549
	rs2675671	G	A	117	0.876068	0.123932	0.777778	0.196581	0.025641	0.0107892
	rs2744434	G	A	119	0.52521	0.47479	0.285714	0.478992	0.235294	0.0017885
	rs2811489	T	C	119	0.823529	0.176471	0.672269	0.302521	0.0252101	0.00357391
	rs2866112	C	G	119	0.668067	0.331933	0.453782	0.428571	0.117647	0.0331915
	rs2929896	G	T	118	0.622881	0.377119	0.415254	0.415254	0.169492	0.0150326
	rs3087882	T	C	119	0.689076	0.310924	0.495798	0.386555	0.117647	0.0310315
	rs31270	C	T	119	0.87395	0.12605	0.773109	0.201681	0.0252101	0.0257769
	rs3136646	C	T	119	0.852941	0.147059	0.756303	0.193277	0.0504202	0.0371899
	rs3177118	G	A	119	0.571429	0.428571	0.344538	0.453782	0.201681	0.0182641
	rs3203728	A	G	119	0.542017	0.457983	0.243697	0.596639	0.159664	0.048277
	rs3253	G	A	119	0.634454	0.365546	0.436975	0.394958	0.168067	0.0237899
	rs341792	C	T	119	0.634454	0.365546	0.394958	0.478992	0.12605	0.0079775
	rs3734296	C	T	119	0.52521	0.47479	0.285714	0.478992	0.235294	0.0017885
	rs3739812	T	G	119	0.647059	0.352941	0.462185	0.369748	0.168067	0.0368427
	rs3740387	C	T	119	0.642857	0.357143	0.445378	0.394958	0.159664	0.0241556
	rs3740409	T	C	119	0.521008	0.478992	0.327731	0.386555	0.285714	0.0294184
	rs3746239	C	G	119	0.722689	0.277311	0.546218	0.352941	0.10084	0.0452461
	rs3750227	C	T	118	0.644068	0.355932	0.415254	0.457627	0.127119	0.000235631
	rs3758582	G	A	119	0.722689	0.277311	0.521008	0.403361	0.0756303	0.0247176
	rs3762799	A	G	118	0.682203	0.317797	0.483051	0.398305	0.118644	0.0172313
	rs3763651	T	C	119	0.773109	0.226891	0.596639	0.352941	0.0504202	0.0294054
	rs3766211	C	T	119	0.794118	0.205882	0.605042	0.378151	0.0168067	0.0464793
	rs3779069	G	A	118	0.601695	0.398305	0.347458	0.508475	0.144068	0.0164872
	rs3809033	A	C	119	0.651261	0.348739	0.453782	0.394958	0.151261	0.0133673
	rs3810244	C	T	119	0.714286	0.285714	0.504202	0.420168	0.0756303	0.0278763
	rs3826941	A	G	119	0.521008	0.478992	0.277311	0.487395	0.235294	0.0181736
	rs3935	T	G	119	0.878151	0.121849	0.764706	0.226891	0.00840336	0.0106851
	rs4234133	C	T	119	0.52521	0.47479	0.277311	0.495798	0.226891	0.0304046
	rs4238518	A	G	119	0.823529	0.176471	0.689076	0.268908	0.0420168	0.00357391
	rs4265	C	T	119	0.810924	0.189076	0.655462	0.310924	0.0336134	0.0348796
	rs4459653	T	C	119	0.630252	0.369748	0.386555	0.487395	0.12605	0.0396993
	rs4698744	T	A	119	0.504202	0.495798	0.268908	0.470588	0.260504	0.0458112
	rs470683	G	A	119	0.642857	0.357143	0.411765	0.462185	0.12605	0.0241556
	rs4719646	A	G	119	0.785714	0.214286	0.613445	0.344538	0.0420168	0.00326902
	rs4736611	G	A	118	0.817797	0.182203	0.686441	0.262712	0.0508475	0.0175088
	rs4804948	T	C	119	0.60084	0.39916	0.369748	0.462185	0.168067	0.0167946
	rs4838645	C	T	119	0.588235	0.411765	0.352941	0.470588	0.176471	0.0423546
	rs501231	T	C	119	0.705882	0.294118	0.512605	0.386555	0.10084	0.00912671
	rs553083	G	A	119	0.647059	0.352941	0.462185	0.369748	0.168067	0.0368427
	rs5744080	T	C	119	0.789916	0.210084	0.739496	0.10084	0.159664	0.0460566
	rs6007169	G	C	119	0.865546	0.134454	0.747899	0.235294	0.0168067	0.0354756
	rs6024001	T	C	119	0.537815	0.462185	0.302521	0.470588	0.226891	0.000920099
	rs6127466	A	G	119	0.508403	0.491597	0.268908	0.478992	0.252101	0.00636044
	rs6127467	T	A	119	0.537815	0.462185	0.302521	0.470588	0.226891	0.000920099
	rs6128397	G	A	119	0.62605	0.37395	0.420168	0.411765	0.168067	0.0419438
	rs6141	G	A	119	0.537815	0.462185	0.260504	0.554622	0.184874	0.0466549
	rs6438190	A	G	119	0.57563	0.42437	0.369748	0.411765	0.218487	0.0441888
	rs6518323	A	G	118	0.504237	0.495763	0.288136	0.432203	0.279661	0.017853
	rs6604	C	T	119	0.794118	0.205882	0.630252	0.327731	0.0420168	0.0133632
	rs663336	T	C	119	0.739496	0.260504	0.563025	0.352941	0.0840336	0.0247132
	rs6684	C	T	119	0.613445	0.386555	0.369748	0.487395	0.142857	0.0398161
	rs669647	T	C	119	0.609244	0.390756	0.369748	0.478992	0.151261	0.0265059
	rs6713887	G	T	119	0.747899	0.252101	0.529412	0.436975	0.0336134	0.000268382
	rs6765459	G	C	119	0.697479	0.302521	0.487395	0.420168	0.092437	0.0287896
	rs6817548	G	A	119	0.689076	0.310924	0.495798	0.386555	0.117647	0.000305075
	rs6977	T	C	119	0.878151	0.121849	0.781513	0.193277	0.0252101	0.0224482
	rs707739	A	C	119	0.777311	0.222689	0.596639	0.361345	0.0420168	0.0479946
	rs708692	T	C	119	0.630252	0.369748	0.420168	0.420168	0.159664	0.0235354
	rs711822	G	A	119	0.630252	0.369748	0.411765	0.436975	0.151261	0.0396993
	rs724309	A	C	119	0.592437	0.407563	0.352941	0.478992	0.168067	0.0162898
	rs7532533	G	C	119	0.798319	0.201681	0.672269	0.252101	0.0756303	0.0136291
	rs7724372	A	G	119	0.62605	0.37395	0.411765	0.428571	0.159664	0.00811677
	rs7810502	A	G	116	0.659483	0.340517	0.396552	0.525862	0.0775862	0.0352863
	rs823086	G	T	119	0.655462	0.344538	0.436975	0.436975	0.12605	0.0377327
	rs828616	A	G	119	0.714286	0.285714	0.512605	0.403361	0.0840336	0.0149889
	rs849526	G	A	119	0.752101	0.247899	0.563025	0.378151	0.0588235	0.0383005
	rs886128	T	C	119	0.781513	0.218487	0.705882	0.151261	0.142857	0.0142774
	rs887023	T	C	119	0.62605	0.37395	0.369748	0.512605	0.117647	0.0237216
	rs904018	G	A	119	0.684874	0.315126	0.462185	0.445378	0.092437	0.0182142
	rs9094	A	G	119	0.609244	0.390756	0.369748	0.478992	0.151261	0.0265059
	rs910800	T	C	119	0.852941	0.147059	0.722689	0.260504	0.0168067	0.0371899
	rs922571	C	T	119	0.773109	0.226891	0.621849	0.302521	0.0756303	0.000898837
	rs9227	G	A	119	0.731092	0.268908	0.537815	0.386555	0.0756303	0.0404884
	rs9299	A	G	118	0.652542	0.347458	0.415254	0.474576	0.110169	0.0214073
	rs626755	C	T	119	0.579832	0.420168	0.327731	0.504202	0.168067	0.0100079
	rs950163	G	T	119	0.663866	0.336134	0.462185	0.403361	0.134454	0.0121371
	rs10049332	A	T	119	0.836134	0.163866	0.714286	0.243697	0.0420168	0.0135738
	rs10225885	A	G	119	0.810924	0.189076	0.655462	0.310924	0.0336134	0.0348796
	rs10271373	A	C	119	0.785714	0.214286	0.596639	0.378151	0.0252101	0.0457512
	rs1039340	A	C	119	0.710084	0.289916	0.521008	0.378151	0.10084	0.0444492
	rs1043029	G	A	119	0.705882	0.294118	0.504202	0.403361	0.092437	0.0457179
	rs1043558	C	A	119	0.52521	0.47479	0.268908	0.512605	0.218487	0.0304046
	rs1043721	T	C	119	0.655462	0.344538	0.403361	0.504202	0.092437	0.0377327
	rs1044551	A	G	119	0.785714	0.214286	0.596639	0.378151	0.0252101	0.0457512
	rs15994	C	G	119	0.542017	0.457983	0.336134	0.411765	0.252101	0.00664302
	rs1046033	T	C	118	0.762712	0.237288	0.610169	0.305085	0.0847458	0.0477652
	rs1048296	G	T	116	0.573276	0.426724	0.336207	0.474138	0.189655	0.0446808
	rs1050362	C	A	119	0.630252	0.369748	0.420168	0.420168	0.159664	0.0150231
	rs1050975	A	G	119	0.815126	0.184874	0.655462	0.319328	0.0252101	0.0342067
	rs1051782	G	C	119	0.563025	0.436975	0.352941	0.420168	0.226891	0.0446415
	rs1057897	G	T	119	0.676471	0.323529	0.478992	0.394958	0.12605	0.000766494
	rs1073505	C	T	119	0.55042	0.44958	0.294118	0.512605	0.193277	0.0105364
	rs1073506	T	G	119	0.55042	0.44958	0.294118	0.512605	0.193277	0.0105364
	rs10771381	G	A	119	0.521008	0.478992	0.294118	0.453782	0.252101	0.0107932
	rs10773	G	C	119	0.542017	0.457983	0.336134	0.411765	0.252101	0.00664302
	rs10780115	T	C	119	0.882353	0.117647	0.798319	0.168067	0.0336134	0.047452
	rs10786736	G	C	119	0.739496	0.260504	0.563025	0.352941	0.0840336	0.0120719
	rs10790256	C	T	119	0.777311	0.222689	0.605042	0.344538	0.0504202	0.0296681
	rs10807805	A	G	119	0.798319	0.201681	0.638655	0.319328	0.0420168	0.00555923
	rs10821524	A	C	119	0.634454	0.365546	0.411765	0.445378	0.142857	0.0237899
	rs10865541	C	T	119	0.630252	0.369748	0.436975	0.386555	0.176471	0.00501744
	rs10951014	C	T	119	0.609244	0.390756	0.378151	0.462185	0.159664	0.00922204
	rs10958709	G	A	119	0.571429	0.428571	0.327731	0.487395	0.184874	0.0182641
	rs11119314	G	A	119	0.647059	0.352941	0.420168	0.453782	0.12605	0.00397745
	rs11153279	T	C	119	0.60084	0.39916	0.361345	0.478992	0.159664	0.0256181
	rs11160608	A	C	119	0.571429	0.428571	0.319328	0.504202	0.176471	0.0460656
	rs1132064	C	T	119	0.55042	0.44958	0.294118	0.512605	0.193277	0.0105364
	rs1132461	T	C	117	0.589744	0.410256	0.358974	0.461538	0.179487	0.0270113
	rs1149154	C	T	116	0.827586	0.172414	0.672414	0.310345	0.0172414	0.0299929
	rs11751163	C	T	118	0.529661	0.470339	0.245763	0.567797	0.186441	0.0306267
	rs11751218	G	T	118	0.529661	0.470339	0.245763	0.567797	0.186441	0.0399002
	rs11957941	C	A	118	0.919492	0.0805085	0.847458	0.144068	0.00847458	0.0499045
	rs12087892	T	C	119	0.936975	0.0630252	0.882353	0.109244	0.00840336	0.0142394
	rs12136961	A	G	119	0.563025	0.436975	0.285714	0.554622	0.159664	0.00577263
	rs12402052	C	G	118	0.762712	0.237288	0.576271	0.372881	0.0508475	0.00984057
	rs12614493	T	C	119	0.722689	0.277311	0.512605	0.420168	0.0672269	0.0452461
	rs1265956	C	T	119	0.920168	0.0798319	0.848739	0.142857	0.00840336	0.0130848
	rs6276	G	A	119	0.584034	0.415966	0.361345	0.445378	0.193277	0.0423359
	rs12820484	T	C	119	0.861345	0.138655	0.739496	0.243697	0.0168067	0.0360958
	rs9610708	T	C	119	0.542017	0.457983	0.243697	0.596639	0.159664	0.048277
	rs13074025	C	A	119	0.684874	0.315126	0.470588	0.428571	0.10084	0.000753039
	rs1633010	T	A	119	0.731092	0.268908	0.512605	0.436975	0.0504202	0.0404884
	rs2064947	C	T	119	0.882353	0.117647	0.781513	0.201681	0.0168067	0.047452
	rs13245393	A	G	119	0.810924	0.189076	0.655462	0.310924	0.0336134	0.0348796
	rs13252234	A	G	119	0.508403	0.491597	0.277311	0.462185	0.260504	0.0467732
	rs1341249	T	C	119	0.5	0.5	0.226891	0.546218	0.226891	0.0454908
	rs1468138	G	T	119	0.651261	0.348739	0.386555	0.529412	0.0840336	0.0217238
	rs149562	C	T	119	0.794118	0.205882	0.621849	0.344538	0.0336134	0.0464793
	rs1571294	C	A	119	0.533613	0.466387	0.252101	0.563025	0.184874	0.0177744
	rs1573612	T	C	119	0.563025	0.436975	0.352941	0.420168	0.226891	0.0446415
	rs1573613	T	C	119	0.563025	0.436975	0.352941	0.420168	0.226891	0.0446415
	rs1610641	T	C	118	0.724576	0.275424	0.5	0.449153	0.0508475	0.0447698
	rs164966	A	G	119	0.798319	0.201681	0.655462	0.285714	0.0588235	0.0422215
	rs17748	C	T	119	0.777311	0.222689	0.605042	0.344538	0.0504202	0.0296681
	rs1870259	A	G	119	0.756303	0.243697	0.571429	0.369748	0.0588235	0.0118508
	rs2015612	T	G	119	0.546218	0.453782	0.294118	0.504202	0.201681	0.0462719
	rs2044831	A	G	119	0.529412	0.470588	0.252101	0.554622	0.193277	0.0308404
	rs2070064	G	A	119	0.89916	0.10084	0.806723	0.184874	0.00840336	0.00382161
	rs2072546	A	G	118	0.550847	0.449153	0.313559	0.474576	0.211864	0.0403404
	rs2072695	T	A	119	0.840336	0.159664	0.722689	0.235294	0.0420168	0.0473077
	rs212091	A	G	119	0.743697	0.256303	0.554622	0.378151	0.0672269	0.00720746
	rs2213283	T	C	119	0.684874	0.315126	0.428571	0.512605	0.0588235	0.011895
	rs2224418	T	C	118	0.576271	0.423729	0.338983	0.474576	0.186441	0.0170013
	rs2238658	A	G	119	0.521008	0.478992	0.285714	0.470588	0.243697	0.0294184
	rs2240243	C	T	117	0.628205	0.371795	0.418803	0.418803	0.162393	0.0154379
	rs2253522	G	A	119	0.718487	0.281513	0.512605	0.411765	0.0756303	0.0148653
	rs2269852	T	C	119	0.752101	0.247899	0.571429	0.361345	0.0672269	0.0383005
	rs2275806	A	G	118	0.618644	0.381356	0.372881	0.491525	0.135593	0.0399019
	rs2277621	G	C	119	0.911765	0.0882353	0.848739	0.12605	0.0252101	0.0238193
	rs2278159	A	G	119	0.684874	0.315126	0.478992	0.411765	0.109244	0.0182142
	rs2288865	C	T	119	0.861345	0.138655	0.739496	0.243697	0.0168067	0.0360958
	rs2291563	C	A	119	0.735294	0.264706	0.537815	0.394958	0.0672269	0.012876
	rs2293004	G	A	119	0.731092	0.268908	0.529412	0.403361	0.0672269	0.0236935
	rs2294919	C	T	119	0.588235	0.411765	0.386555	0.403361	0.210084	0.0277088
	rs2306646	C	G	119	0.542017	0.457983	0.252101	0.579832	0.168067	0.0283082
	rs2339494	G	C	118	0.618644	0.381356	0.40678	0.423729	0.169492	0.0250217
	rs235432	G	T	119	0.726891	0.273109	0.554622	0.344538	0.10084	0.0155347
	rs2407992	C	G	119	0.789916	0.210084	0.739496	0.10084	0.159664	0.0460566
	rs2627004	G	T	119	0.920168	0.0798319	0.848739	0.142857	0.00840336	0.0028198
	rs268228	A	G	119	0.752101	0.247899	0.588235	0.327731	0.0840336	0.0383005
	rs2724692	T	C	119	0.533613	0.466387	0.302521	0.462185	0.235294	0.0455775
	rs2767	C	T	119	0.60084	0.39916	0.319328	0.563025	0.117647	0.0256181
	rs2805901	C	T	119	0.613445	0.386555	0.529412	0.168067	0.302521	0.00131707
	rs2878960	C	T	119	0.815126	0.184874	0.655462	0.319328	0.0252101	0.0190339
	rs2976399	G	A	119	0.533613	0.466387	0.285714	0.495798	0.218487	0.0455775
	rs305968	G	A	119	0.726891	0.273109	0.537815	0.378151	0.0840336	0.0431407
	rs3112369	C	T	118	0.661017	0.338983	0.440678	0.440678	0.118644	0.0126285
	rs340839	T	C	119	0.567227	0.432773	0.294118	0.546218	0.159664	0.0458271
	rs3733230	C	G	119	0.613445	0.386555	0.352941	0.521008	0.12605	0.0147761
	rs3748309	G	A	119	0.609244	0.390756	0.386555	0.445378	0.168067	0.0265059
	rs3764613	A	G	119	0.621849	0.378151	0.394958	0.453782	0.151261	0.0149944
	rs3766212	A	G	119	0.794118	0.205882	0.605042	0.378151	0.0168067	0.0464793
	rs3803826	T	C	119	0.642857	0.357143	0.436975	0.411765	0.151261	0.0131398
	rs3808351	G	A	119	0.798319	0.201681	0.647059	0.302521	0.0504202	0.0219441
	rs3817	C	A	119	0.521008	0.478992	0.327731	0.386555	0.285714	0.0461882
	rs3817705	C	T	119	0.789916	0.210084	0.605042	0.369748	0.0252101	0.0460566
	rs382629	A	G	119	0.558824	0.441176	0.310924	0.495798	0.193277	0.0295253
	rs3884596	A	C	119	0.735294	0.264706	0.529412	0.411765	0.0588235	0.012876
	rs404280	G	A	119	0.521008	0.478992	0.260504	0.521008	0.218487	0.0294184
	rs4150106	G	A	119	0.563025	0.436975	0.352941	0.420168	0.226891	0.0172228
	rs4508518	G	A	119	0.542017	0.457983	0.268908	0.546218	0.184874	0.048277
	rs470279	C	T	119	0.642857	0.357143	0.411765	0.462185	0.12605	0.0241556
	rs470293	C	T	119	0.642857	0.357143	0.411765	0.462185	0.12605	0.0241556
	rs470933	C	T	118	0.639831	0.360169	0.40678	0.466102	0.127119	0.0367383
	rs470934	G	T	119	0.613445	0.386555	0.378151	0.470588	0.151261	0.0269543
	rs4711631	C	A	119	0.579832	0.420168	0.378151	0.403361	0.218487	0.0429468
	rs4725068	G	A	119	0.773109	0.226891	0.588235	0.369748	0.0420168	0.0294054
	rs4738320	A	G	118	0.915254	0.0847458	0.847458	0.135593	0.0169492	0.0490036
	rs4850721	G	C	119	0.840336	0.159664	0.714286	0.252101	0.0336134	0.0473077
	rs4850722	G	C	119	0.840336	0.159664	0.714286	0.252101	0.0336134	0.0473077
	rs4872448	T	C	119	0.684874	0.315126	0.470588	0.428571	0.10084	0.0330106
	rs499812	A	G	119	0.630252	0.369748	0.369748	0.521008	0.109244	0.0150231
	rs5962885	C	A	119	0.907563	0.092437	0.87395	0.0672269	0.0588235	0.00838285
	rs5974570	A	G	119	0.886555	0.113445	0.848739	0.0756303	0.0756303	0.0186098
	rs6011280	A	C	119	0.735294	0.264706	0.537815	0.394958	0.0672269	0.00693688
	rs6069232	C	T	119	0.537815	0.462185	0.302521	0.470588	0.226891	0.000920099
	rs6086678	T	A	119	0.504202	0.495798	0.226891	0.554622	0.218487	0.000245431
	rs6090043	T	C	118	0.588983	0.411017	0.372881	0.432203	0.194915	0.000203834
	rs609559	G	A	119	0.777311	0.222689	0.621849	0.310924	0.0672269	0.00171117
	rs6971850	C	A	119	0.584034	0.415966	0.344538	0.478992	0.176471	0.0423359
	rs708723	T	C	119	0.512605	0.487395	0.235294	0.554622	0.210084	0.028875
	rs7420703	T	C	118	0.677966	0.322034	0.474576	0.40678	0.118644	0.00317194
	rs743572	A	G	119	0.584034	0.415966	0.369748	0.428571	0.201681	0.016105
	rs746192	A	C	119	0.903361	0.0966387	0.815126	0.176471	0.00840336	0.0114225
	rs7805092	G	T	119	0.781513	0.218487	0.605042	0.352941	0.0420168	0.00370016
	rs829047	T	C	119	0.773109	0.226891	0.605042	0.336134	0.0588235	0.0294054
	rs898869	C	T	119	0.537815	0.462185	0.327731	0.420168	0.252101	0.0466549
	rs9322260	C	G	119	0.882353	0.117647	0.773109	0.218487	0.00840336	0.0200724
	rs9349593	A	G	119	0.911765	0.0882353	0.857143	0.109244	0.0336134	0.0060017
	rs9419598	A	G	119	0.537815	0.462185	0.277311	0.521008	0.201681	0.0466549
	rs9508887	A	T	119	0.920168	0.0798319	0.857143	0.12605	0.0168067	0.0480909
	rs9579226	C	T	119	0.857143	0.142857	0.731092	0.252101	0.0168067	0.00361934
	rs9600567	C	T	119	0.676471	0.323529	0.453782	0.445378	0.10084	0.0196638
	rs9977552	C	T	118	0.610169	0.389831	0.381356	0.457627	0.161017	0.0092526
	rs1002352	G	T	119	0.529412	0.470588	0.268908	0.521008	0.210084	0.0115811
	rs10068	G	C	118	0.584746	0.415254	0.347458	0.474576	0.177966	0.00527753
	rs10259620	G	A	119	0.655462	0.344538	0.386555	0.537815	0.0756303	0.0377327
	rs1042815	T	C	119	0.785714	0.214286	0.605042	0.361345	0.0336134	0.0270572
	rs1044115	T	C	118	0.563559	0.436441	0.322034	0.483051	0.194915	0.0280461
	rs1046048	C	T	118	0.677966	0.322034	0.457627	0.440678	0.101695	0.00317194
	rs1046780	T	C	119	0.605042	0.394958	0.386555	0.436975	0.176471	0.025834
	rs1048490	C	T	118	0.690678	0.309322	0.457627	0.466102	0.0762712	0.0104207
	rs10491246	T	C	119	0.844538	0.155462	0.722689	0.243697	0.0336134	0.0427921
	rs1051545	A	G	114	0.842105	0.157895	0.719298	0.245614	0.0350877	0.022185
	rs10518209	C	T	119	0.777311	0.222689	0.630252	0.294118	0.0756303	0.0479946
	rs1055547	A	G	119	0.705882	0.294118	0.504202	0.403361	0.092437	0.00912671
	rs1056739	T	C	119	0.697479	0.302521	0.495798	0.403361	0.10084	0.01903
	rs1056857	G	A	116	0.706897	0.293103	0.508621	0.396552	0.0948276	0.0285912
	rs1060442	C	T	119	0.689076	0.310924	0.495798	0.386555	0.117647	0.0108169
	rs1061970	T	C	119	0.529412	0.470588	0.285714	0.487395	0.226891	0.0308404
	rs1062033	G	C	118	0.580508	0.419492	0.330508	0.5	0.169492	0.0234658
	rs1062708	C	T	119	0.504202	0.495798	0.268908	0.470588	0.260504	0.0458112
	rs1063538	T	C	119	0.579832	0.420168	0.344538	0.470588	0.184874	0.00554274
	rs1063639	T	C	119	0.605042	0.394958	0.369748	0.470588	0.159664	0.0414456
	rs11236	G	A	118	0.762712	0.237288	0.576271	0.372881	0.0508475	0.0185045
	rs1127101	T	C	117	0.760684	0.239316	0.57265	0.376068	0.0512821	0.0285701
	rs1128687	T	C	119	0.533613	0.466387	0.268908	0.529412	0.201681	0.0177744
	rs1128705	C	G	119	0.529412	0.470588	0.268908	0.521008	0.210084	0.0175722
	rs11354	G	A	118	0.783898	0.216102	0.618644	0.330508	0.0508475	0.00341203
	rs1147289	C	T	119	0.878151	0.121849	0.773109	0.210084	0.0168067	0.00105249
	rs11823	A	G	119	0.537815	0.462185	0.327731	0.420168	0.252101	0.018313
	rs1192511	A	G	119	0.563025	0.436975	0.336134	0.453782	0.210084	0.0446415
	rs1199039	T	C	119	0.802521	0.197479	0.647059	0.310924	0.0420168	0.0214842
	rs1294231	A	G	119	0.710084	0.289916	0.487395	0.445378	0.0672269	0.0296451
	rs13047	A	C	119	0.605042	0.394958	0.546218	0.117647	0.336134	0.00155277
	rs132618	A	T	119	0.567227	0.432773	0.336134	0.462185	0.201681	0.0458271
	rs1363560	C	T	119	0.521008	0.478992	0.277311	0.487395	0.235294	0.0181736
	rs137086	A	G	119	0.735294	0.264706	0.537815	0.394958	0.0672269	0.0385804
	rs1385600	T	C	119	0.596639	0.403361	0.386555	0.420168	0.193277	0.0168665
	rs14310	T	A	118	0.830508	0.169492	0.70339	0.254237	0.0423729	0.013698
	rs14792	C	T	119	0.668067	0.331933	0.436975	0.462185	0.10084	0.0331915
	rs1564458	C	T	117	0.786325	0.213675	0.641026	0.290598	0.0683761	0.0415331
	rs1567962	T	C	117	0.542735	0.457265	0.333333	0.418803	0.247863	2.42675e-05
	rs163057	G	T	119	0.806723	0.193277	0.647059	0.319328	0.0336134	0.004854
	rs1648281	A	G	119	0.537815	0.462185	0.294118	0.487395	0.218487	0.0466549
	rs1680778	C	A	117	0.576923	0.423077	0.333333	0.487179	0.179487	0.0232039
	rs1680791	C	T	118	0.533898	0.466102	0.279661	0.508475	0.211864	0.0149014
	rs1806201	G	A	119	0.579832	0.420168	0.344538	0.470588	0.184874	0.0164962
	rs1864384	T	G	119	0.840336	0.159664	0.705882	0.268908	0.0252101	0.0050219
	rs1891227	C	T	119	0.789916	0.210084	0.621849	0.336134	0.0420168	0.0460566
	rs2072454	C	T	119	0.693277	0.306723	0.495798	0.394958	0.109244	0.0054807
	rs2073762	G	A	119	0.537815	0.462185	0.310924	0.453782	0.235294	0.0286777
	rs2088138	T	C	119	0.651261	0.348739	0.436975	0.428571	0.134454	0.00213122
	rs2102541	T	G	119	0.823529	0.176471	0.697479	0.252101	0.0504202	0.00814291
	rs2158274	C	G	119	0.743697	0.256303	0.563025	0.361345	0.0756303	0.022474
	rs2213842	A	G	119	0.521008	0.478992	0.277311	0.487395	0.235294	0.0107932
	rs221790	C	G	119	0.848739	0.151261	0.739496	0.218487	0.0420168	0.0394239
	rs2240056	C	G	119	0.739496	0.260504	0.554622	0.369748	0.0756303	0.0120719
	rs2248407	C	T	119	0.596639	0.403361	0.386555	0.420168	0.193277	0.0168665
	rs2270576	G	A	119	0.789916	0.210084	0.638655	0.302521	0.0588235	0.0247164
	rs2270893	T	C	119	0.542017	0.457983	0.294118	0.495798	0.210084	0.048277
	rs2274587	G	A	119	0.516807	0.483193	0.310924	0.411765	0.277311	0.047674
	rs2277923	G	A	119	0.689076	0.310924	0.445378	0.487395	0.0672269	0.00548353
	rs2278600	C	T	117	0.529915	0.470085	0.34188	0.376068	0.282051	0.0448347
	rs2278740	A	T	119	0.752101	0.247899	0.571429	0.361345	0.0672269	0.0195282
	rs2284051	T	G	119	0.542017	0.457983	0.243697	0.596639	0.159664	0.048277
	rs2290740	G	A	119	0.638655	0.361345	0.386555	0.504202	0.109244	0.0244867
	rs2290883	A	G	119	0.613445	0.386555	0.403361	0.420168	0.176471	0.0147761
	rs2292826	G	A	118	0.720339	0.279661	0.542373	0.355932	0.101695	0.0444144
	rs2293347	G	A	118	0.682203	0.317797	0.474576	0.415254	0.110169	2.18868e-05
	rs2295613	C	T	119	0.710084	0.289916	0.504202	0.411765	0.0840336	0.0296451
	rs229592	T	C	119	0.579832	0.420168	0.336134	0.487395	0.176471	0.0429468
	rs2296405	G	A	119	0.630252	0.369748	0.403361	0.453782	0.142857	0.0235354
	rs2298278	G	A	119	0.537815	0.462185	0.336134	0.403361	0.260504	0.0466549
	rs2304725	T	C	119	0.609244	0.390756	0.361345	0.495798	0.142857	0.0151324
	rs2306641	C	T	119	0.668067	0.331933	0.445378	0.445378	0.109244	0.00699092
	rs243849	C	T	119	0.827731	0.172269	0.680672	0.294118	0.0252101	0.000598372
	rs2450122	A	G	119	0.609244	0.390756	0.394958	0.428571	0.176471	0.0265059
	rs2453412	T	C	119	0.743697	0.256303	0.563025	0.361345	0.0756303	0.022474
	rs2511162	A	G	116	0.590517	0.409483	0.37069	0.439655	0.189655	0.0366371
	rs2555143	A	C	119	0.584034	0.415966	0.361345	0.445378	0.193277	0.0104773
	rs2565061	G	A	119	0.57563	0.42437	0.310924	0.529412	0.159664	0.0441888
	rs2724691	A	G	119	0.533613	0.466387	0.302521	0.462185	0.235294	0.0455775
	rs279779	C	T	119	0.773109	0.226891	0.613445	0.319328	0.0672269	0.0170127
	rs279780	G	A	119	0.773109	0.226891	0.613445	0.319328	0.0672269	0.0170127
	rs279781	G	C	119	0.794118	0.205882	0.621849	0.344538	0.0336134	0.0464793
	rs279782	G	T	119	0.773109	0.226891	0.613445	0.319328	0.0672269	0.0170127
	rs2822446	C	T	119	0.634454	0.365546	0.369748	0.529412	0.10084	0.0140923
	rs284855	C	T	119	0.567227	0.432773	0.344538	0.445378	0.210084	0.00992313
	rs284858	G	A	119	0.567227	0.432773	0.344538	0.445378	0.210084	0.00992313
	rs2852786	C	T	119	0.605042	0.394958	0.302521	0.605042	0.092437	0.0414456
	rs2856585	G	A	119	0.777311	0.222689	0.621849	0.310924	0.0672269	0.0479946
	rs3099	C	G	119	0.680672	0.319328	0.453782	0.453782	0.092437	0.000744522
	rs3169425	C	T	118	0.59322	0.40678	0.313559	0.559322	0.127119	0.0430397
	rs3169950	G	A	119	0.890756	0.109244	0.806723	0.168067	0.0252101	0.0363117
	rs3189850	G	T	117	0.888889	0.111111	0.786325	0.205128	0.00854701	0.0380023
	rs3203726	T	C	117	0.542735	0.457265	0.247863	0.589744	0.162393	0.0475612
	rs3210894	T	C	119	0.571429	0.428571	0.361345	0.420168	0.218487	0.00635395
	rs3213545	T	C	119	0.563025	0.436975	0.302521	0.521008	0.176471	0.0446415
	rs3729640	C	T	119	0.840336	0.159664	0.705882	0.268908	0.0252101	0.0140032
	rs3731881	T	C	119	0.680672	0.319328	0.453782	0.453782	0.092437	0.000744522
	rs3732114	G	A	119	0.62605	0.37395	0.344538	0.563025	0.092437	0.00811677
	rs3732150	A	G	119	0.857143	0.142857	0.747899	0.218487	0.0336134	0.0189148
	rs3733484	T	G	118	0.622881	0.377119	0.398305	0.449153	0.152542	0.00251298
	rs3736175	G	A	119	0.865546	0.134454	0.756303	0.218487	0.0252101	0.0354756
	rs3742711	C	T	119	0.785714	0.214286	0.613445	0.344538	0.0420168	0.0457512
	rs3744208	T	C	119	0.651261	0.348739	0.411765	0.478992	0.109244	0.0376471
	rs3746183	G	T	119	0.613445	0.386555	0.352941	0.521008	0.12605	0.0269543
	rs3749395	G	A	117	0.641026	0.358974	0.376068	0.529915	0.0940171	0.0364653
	rs3753396	G	A	118	0.5	0.5	0.262712	0.474576	0.262712	0.0453287
	rs3802815	T	C	119	0.756303	0.243697	0.596639	0.319328	0.0840336	0.0118508
	rs3808353	G	A	119	0.861345	0.138655	0.747899	0.226891	0.0252101	0.0360958
	rs3812676	C	T	119	0.689076	0.310924	0.445378	0.487395	0.0672269	0.0310315
	rs3813166	C	T	119	0.945378	0.0546218	0.92437	0.0420168	0.0336134	0.0310921
	rs3817805	G	A	119	0.726891	0.273109	0.537815	0.378151	0.0840336	0.0239424
	rs3912391	A	G	119	0.735294	0.264706	0.529412	0.411765	0.0588235	0.012876
	rs4078216	T	C	119	0.558824	0.441176	0.302521	0.512605	0.184874	0.0295253
	rs4261436	T	C	119	0.676471	0.323529	0.436975	0.478992	0.0840336	0.0112158
	rs451388	C	G	119	0.512605	0.487395	0.252101	0.521008	0.226891	0.0483798
	rs4689163	A	G	119	0.739496	0.260504	0.554622	0.369748	0.0756303	0.0120719
	rs4738118	A	G	119	0.731092	0.268908	0.521008	0.420168	0.0588235	0.0236935
	rs4779801	G	T	119	0.689076	0.310924	0.445378	0.487395	0.0672269	0.0310315
	rs4779804	G	T	119	0.689076	0.310924	0.445378	0.487395	0.0672269	0.0310315
	rs4808722	T	G	119	0.903361	0.0966387	0.823529	0.159664	0.0168067	0.0114225
	rs4852735	A	G	119	0.781513	0.218487	0.638655	0.285714	0.0756303	0.0142774
	rs4868663	T	C	119	0.844538	0.155462	0.722689	0.243697	0.0336134	0.0223405
	rs4891	T	C	119	0.865546	0.134454	0.747899	0.235294	0.0168067	0.0354756
	rs494589	C	T	119	0.894958	0.105042	0.865546	0.0588235	0.0756303	0.00116959
	rs4971005	G	A	118	0.927966	0.0720339	0.864407	0.127119	0.00847458	0.021853
	rs497953	T	C	119	0.722689	0.277311	0.529412	0.386555	0.0840336	0.0247176
	rs498872	C	T	119	0.764706	0.235294	0.571429	0.386555	0.0420168	0.0187534
	rs5026717	T	C	118	0.538136	0.461864	0.305085	0.466102	0.228814	0.000908057
	rs507776	T	C	119	0.655462	0.344538	0.462185	0.386555	0.151261	0.0139222
	rs555022	T	C	119	0.647059	0.352941	0.462185	0.369748	0.168067	0.0368427
	rs557630	A	G	119	0.647059	0.352941	0.462185	0.369748	0.168067	0.0368427
	rs5770755	C	T	119	0.852941	0.147059	0.722689	0.260504	0.0168067	0.0371899
	rs5992854	T	C	117	0.820513	0.179487	0.675214	0.290598	0.034188	0.0276714
	rs6013193	T	G	119	0.630252	0.369748	0.394958	0.470588	0.134454	0.0150231
	rs6069234	G	A	119	0.537815	0.462185	0.302521	0.470588	0.226891	0.000920099
	rs6113	T	C	117	0.692308	0.307692	0.470085	0.444444	0.0854701	0.0427392
	rs6113954	G	A	119	0.57563	0.42437	0.302521	0.546218	0.151261	0.0441888
	rs6127471	T	C	118	0.542373	0.457627	0.305085	0.474576	0.220339	0.00252995
	rs643634	A	C	119	0.701681	0.298319	0.512605	0.378151	0.109244	0.0477552
	rs6503070	C	T	119	0.62605	0.37395	0.369748	0.512605	0.117647	0.0155695
	rs6604120	C	T	118	0.834746	0.165254	0.686441	0.29661	0.0169492	0.0252926
	rs6680	T	C	119	0.630252	0.369748	0.420168	0.420168	0.159664	0.0150231
	rs6704	C	A	119	0.789916	0.210084	0.647059	0.285714	0.0672269	0.0460566
	rs675804	G	A	119	0.852941	0.147059	0.731092	0.243697	0.0252101	0.00836217
	rs6779853	A	G	119	0.697479	0.302521	0.487395	0.420168	0.092437	0.0287896
	rs680431	C	G	118	0.673729	0.326271	0.516949	0.313559	0.169492	0.0111457
	rs6812211	A	C	119	0.504202	0.495798	0.235294	0.537815	0.226891	0.0302312
	rs6894626	C	T	119	0.621849	0.378151	0.403361	0.436975	0.159664	0.0406686
	rs700363	C	T	119	0.680672	0.319328	0.453782	0.453782	0.092437	0.0339601
	rs7043516	A	C	119	0.97479	0.0252101	0.957983	0.0336134	0.00840336	0.0461702
	rs7226	G	A	119	0.693277	0.306723	0.470588	0.445378	0.0840336	0.010011
	rs723333	A	C	119	0.609244	0.390756	0.369748	0.478992	0.151261	0.0265059
	rs731236	T	C	119	0.886555	0.113445	0.789916	0.193277	0.0168067	0.041159
	rs7373805	C	T	119	0.684874	0.315126	0.470588	0.428571	0.10084	0.000753039
	rs746489	A	C	119	0.588235	0.411765	0.361345	0.453782	0.184874	0.0277088
	rs7476	A	C	118	0.800847	0.199153	0.627119	0.347458	0.0254237	0.0399553
	rs747779	C	T	119	0.861345	0.138655	0.756303	0.210084	0.0336134	0.0160036
	rs7553437	T	C	119	0.831933	0.168067	0.680672	0.302521	0.0168067	0.0270685
	rs759011	G	A	119	0.722689	0.277311	0.546218	0.352941	0.10084	0.00781001
	rs7647378	C	T	119	0.62605	0.37395	0.361345	0.529412	0.109244	0.0419438
	rs7671578	A	T	119	0.777311	0.222689	0.630252	0.294118	0.0756303	0.0479946
	rs7703447	C	T	119	0.890756	0.109244	0.789916	0.201681	0.00840336	0.0180291
	rs7721	A	C	117	0.910256	0.0897436	0.846154	0.128205	0.025641	0.0260411
	rs7752838	G	A	119	0.642857	0.357143	0.394958	0.495798	0.109244	0.00405448
	rs7858727	A	C	119	0.798319	0.201681	0.647059	0.302521	0.0504202	0.0219441
	rs7873147	C	T	119	0.563025	0.436975	0.319328	0.487395	0.193277	0.0172228
	rs789990	A	G	119	0.584034	0.415966	0.352941	0.462185	0.184874	0.0423359
	rs7955803	C	T	118	0.855932	0.144068	0.737288	0.237288	0.0254237	0.0361457
	rs808919	C	G	119	0.97479	0.0252101	0.957983	0.0336134	0.00840336	0.0461702
	rs8090	G	A	119	0.890756	0.109244	0.806723	0.168067	0.0252101	0.0363117
	rs8135963	T	C	119	0.857143	0.142857	0.731092	0.252101	0.0168067	0.0360815
	rs880827	T	C	119	0.651261	0.348739	0.411765	0.478992	0.109244	0.0376471
	rs8833	T	C	119	0.726891	0.273109	0.529412	0.394958	0.0756303	0.0239424
	rs886129	T	G	119	0.752101	0.247899	0.663866	0.176471	0.159664	0.0195282
	rs904647	T	C	119	0.521008	0.478992	0.285714	0.470588	0.243697	0.0461882
	rs904654	G	A	119	0.571429	0.428571	0.352941	0.436975	0.210084	0.0460656
	rs904655	C	T	118	0.572034	0.427966	0.355932	0.432203	0.211864	0.0455975
	rs904957	A	G	119	0.613445	0.386555	0.361345	0.504202	0.134454	0.0269543
	rs9165	T	C	119	0.516807	0.483193	0.260504	0.512605	0.226891	0.047674
	rs9263875	A	G	119	0.55042	0.44958	0.319328	0.462185	0.218487	0.0449087
	rs9304684	G	A	119	0.554622	0.445378	0.319328	0.470588	0.210084	0.0441834
	rs9381266	T	C	119	0.857143	0.142857	0.731092	0.252101	0.0168067	0.0189148
	rs9401594	T	C	118	0.550847	0.449153	0.279661	0.542373	0.177966	0.0151556
	rs9423302	G	A	119	0.865546	0.134454	0.747899	0.235294	0.0168067	0.0027938
	rs943851	T	C	119	0.533613	0.466387	0.277311	0.512605	0.210084	0.0109137
	rs9657900	G	T	119	0.722689	0.277311	0.546218	0.352941	0.10084	0.00781001
	rs709679	C	T	119	0.546218	0.453782	0.310924	0.470588	0.218487	0.0284099
	rs9843296	T	C	119	0.92437	0.0756303	0.857143	0.134454	0.00840336	0.00183545
	rs9858516	T	C	119	0.52521	0.47479	0.277311	0.495798	0.226891	0.0304046
	rs9898751	C	A	119	0.663866	0.336134	0.411765	0.504202	0.0840336	0.0212819
	rs9941275	A	G	119	0.710084	0.289916	0.521008	0.378151	0.10084	0.0444492
	rs10026646	T	C	119	0.563025	0.436975	0.352941	0.420168	0.226891	0.0172228
	rs10103397	G	A	119	0.831933	0.168067	0.689076	0.285714	0.0252101	0.0136356
	rs1010584	T	C	119	0.852941	0.147059	0.722689	0.260504	0.0168067	0.0371899
	rs10147988	A	G	119	0.617647	0.382353	0.386555	0.462185	0.151261	0.0254253
	rs10170244	G	A	119	0.760504	0.239496	0.571429	0.378151	0.0504202	0.018536
	rs1025689	C	G	119	0.542017	0.457983	0.302521	0.478992	0.218487	0.00664302
	rs10413687	G	A	119	0.558824	0.441176	0.319328	0.478992	0.201681	0.0295253
	rs1043044	T	C	118	0.644068	0.355932	0.567797	0.152542	0.279661	0.0111699
	rs1045596	G	A	116	0.62069	0.37931	0.336207	0.568966	0.0948276	0.00847364
	rs1063539	G	C	119	0.747899	0.252101	0.521008	0.453782	0.0252101	0.0372685
	rs10736935	T	C	119	0.596639	0.403361	0.386555	0.420168	0.193277	0.0258572
	rs10744790	C	T	119	0.714286	0.285714	0.512605	0.403361	0.0840336	0.0278763
	rs10752830	A	G	119	0.722689	0.277311	0.563025	0.319328	0.117647	0.0151046
	rs10769108	G	A	119	0.781513	0.218487	0.613445	0.336134	0.0504202	0.0300604
	rs10791011	C	T	119	0.542017	0.457983	0.310924	0.462185	0.226891	0.048277
	rs10883723	T	C	119	0.701681	0.298319	0.504202	0.394958	0.10084	0.0285139
	rs10891310	C	A	119	0.659664	0.340336	0.470588	0.378151	0.151261	0.0210071
	rs11032349	A	T	119	0.743697	0.256303	0.579832	0.327731	0.092437	0.00162523
	rs11191355	G	A	119	0.613445	0.386555	0.411765	0.403361	0.184874	0.0398161
	rs11204782	C	G	119	0.936975	0.0630252	0.882353	0.109244	0.00840336	0.0142394
	rs11541061	A	G	119	0.651261	0.348739	0.428571	0.445378	0.12605	0.0376471
	rs11634474	G	C	119	0.563025	0.436975	0.327731	0.470588	0.201681	0.0446415
	rs11752896	A	G	119	0.579832	0.420168	0.378151	0.403361	0.218487	0.0429468
	rs11761556	A	C	118	0.762712	0.237288	0.59322	0.338983	0.0677966	0.00984057
	rs12445818	C	T	119	0.710084	0.289916	0.521008	0.378151	0.10084	0.0296451
	rs12604265	T	C	119	0.642857	0.357143	0.436975	0.411765	0.151261	0.0131398
	rs12608183	A	G	119	0.642857	0.357143	0.436975	0.411765	0.151261	0.0131398
	rs1051820	G	T	119	0.592437	0.407563	0.344538	0.495798	0.159664	0.0430036
	rs12976582	T	C	119	0.861345	0.138655	0.739496	0.243697	0.0168067	0.0360958
	rs13389099	C	G	119	0.798319	0.201681	0.647059	0.302521	0.0504202	0.0422215
	rs1386829	A	G	113	0.530973	0.469027	0.371681	0.318584	0.309735	0.0442202
	rs1544636	G	A	119	0.768908	0.231092	0.588235	0.361345	0.0504202	0.00214941
	rs1868800	G	C	119	0.516807	0.483193	0.260504	0.512605	0.226891	0.047674
	rs1869660	C	T	119	0.739496	0.260504	0.554622	0.369748	0.0756303	0.0247132
	rs1875324	C	A	119	0.5	0.5	0.201681	0.596639	0.201681	0.0454908
	rs1962412	G	A	119	0.794118	0.205882	0.638655	0.310924	0.0504202	0.0230175
	rs198783	C	T	119	0.516807	0.483193	0.411765	0.210084	0.378151	0.047674
	rs2005899	C	T	118	0.872881	0.127119	0.771186	0.20339	0.0254237	0.0112853
	rs2062554	C	A	119	0.848739	0.151261	0.722689	0.252101	0.0252101	0.0394239
	rs2074626	G	T	119	0.630252	0.369748	0.420168	0.420168	0.159664	0.0150231
	rs2339495	A	T	119	0.617647	0.382353	0.403361	0.428571	0.168067	0.0254253
	rs2450138	G	A	119	0.609244	0.390756	0.394958	0.428571	0.176471	0.0265059
	rs2459111	G	A	119	0.659664	0.340336	0.436975	0.445378	0.117647	0.0210071
	rs306447	T	C	119	0.668067	0.331933	0.445378	0.445378	0.109244	0.00699092
	rs3118625	A	C	119	0.722689	0.277311	0.546218	0.352941	0.10084	0.0247176
	rs3134430	A	T	119	0.756303	0.243697	0.563025	0.386555	0.0504202	0.0352229
	rs3193970	A	G	117	0.700855	0.299145	0.487179	0.42735	0.0854701	0.0479154
	rs3743779	A	C	119	0.710084	0.289916	0.521008	0.378151	0.10084	0.0444492
	rs3761611	C	T	119	0.533613	0.466387	0.420168	0.226891	0.352941	0.0295202
	rs3824603	A	G	112	0.589286	0.410714	0.446429	0.285714	0.267857	0.0413212
	rs3848832	C	T	119	0.516807	0.483193	0.243697	0.546218	0.210084	0.000120464
	rs40517	T	C	119	0.55042	0.44958	0.285714	0.529412	0.184874	0.0175192
	rs4237394	T	C	119	0.579832	0.420168	0.327731	0.504202	0.168067	0.0429468
	rs4253013	G	A	119	0.668067	0.331933	0.478992	0.378151	0.142857	0.0331915
	rs4375771	A	G	119	0.521008	0.478992	0.277311	0.487395	0.235294	0.0181736
	rs455645	C	T	119	0.60084	0.39916	0.361345	0.478992	0.159664	0.0256181
	rs1589848	A	G	119	0.642857	0.357143	0.420168	0.445378	0.134454	0.036646
	rs4685173	A	G	119	0.558824	0.441176	0.302521	0.512605	0.184874	0.0440943
	rs4801914	G	T	118	0.627119	0.372881	0.389831	0.474576	0.135593	0.041167
	rs4802932	A	G	119	0.62605	0.37395	0.386555	0.478992	0.134454	0.0419438
	rs4897739	T	C	118	0.555085	0.444915	0.305085	0.5	0.194915	0.0300559
	rs4936859	A	G	119	0.663866	0.336134	0.453782	0.420168	0.12605	0.0341108
	rs505268	C	T	119	0.693277	0.306723	0.512605	0.361345	0.12605	0.018361
	rs557749	G	A	119	0.693277	0.306723	0.512605	0.361345	0.12605	0.018361
	rs590121	G	T	118	0.788136	0.211864	0.644068	0.288136	0.0677966	0.0456489
	rs5916825	C	T	118	0.618644	0.381356	0.533898	0.169492	0.29661	0.023032
	rs6010717	G	C	119	0.668067	0.331933	0.462185	0.411765	0.12605	0.00699092
	rs6056221	A	G	117	0.508547	0.491453	0.239316	0.538462	0.222222	0.00022025
	rs6489738	C	T	119	0.542017	0.457983	0.268908	0.546218	0.184874	0.0191921
	rs6493311	C	T	119	0.596639	0.403361	0.378151	0.436975	0.184874	0.0442858
	rs6526806	A	G	119	0.810924	0.189076	0.773109	0.0756303	0.151261	0.0348796
	rs6554812	T	C	119	0.903361	0.0966387	0.831933	0.142857	0.0252101	0.0301902
	rs6671524	G	C	119	0.617647	0.382353	0.403361	0.428571	0.168067	0.0254253
	rs6701578	G	A	119	0.596639	0.403361	0.319328	0.554622	0.12605	0.0168665
	rs6730123	A	G	119	0.87395	0.12605	0.773109	0.201681	0.0252101	0.0111434
	rs6863066	C	T	119	0.584034	0.415966	0.344538	0.478992	0.176471	0.0423359
	rs7215075	A	G	119	0.651261	0.348739	0.436975	0.428571	0.134454	0.0133673
	rs7429945	T	C	119	0.521008	0.478992	0.294118	0.453782	0.252101	0.00626448
	rs7431353	A	G	119	0.546218	0.453782	0.285714	0.521008	0.193277	0.0102917
	rs7500820	T	C	119	0.592437	0.407563	0.319328	0.546218	0.134454	0.0430036
	rs784634	T	G	119	0.861345	0.138655	0.739496	0.243697	0.0168067	0.0360958
	rs8110740	A	G	119	0.521008	0.478992	0.302521	0.436975	0.260504	0.0461882
	rs9394445	G	A	119	0.848739	0.151261	0.739496	0.218487	0.0420168	0.0394239
	rs9520224	T	C	119	0.726891	0.273109	0.537815	0.378151	0.0840336	0.00730014
	rs9885312	G	C	119	0.537815	0.462185	0.319328	0.436975	0.243697	0.018313
	rs9900627	A	G	119	0.87395	0.12605	0.756303	0.235294	0.00840336	0.0257769
	rs9906592	G	A	119	0.705882	0.294118	0.495798	0.420168	0.0840336	0.0457179
	rs1007404	C	G	119	0.668067	0.331933	0.453782	0.428571	0.117647	0.0115537
	rs10100704	T	C	118	0.555085	0.444915	0.29661	0.516949	0.186441	0.0439835
	rs10424893	T	C	118	0.919492	0.0805085	0.847458	0.144068	0.00847458	0.0499045
	rs10494096	G	A	118	0.813559	0.186441	0.669492	0.288136	0.0423729	0.00343329
	rs1121196	T	C	119	0.840336	0.159664	0.722689	0.235294	0.0420168	0.00210107
	rs1125897	C	T	119	0.840336	0.159664	0.722689	0.235294	0.0420168	0.00210107
	rs1155965	T	C	119	0.584034	0.415966	0.352941	0.462185	0.184874	0.0291084
	rs1288547	G	A	119	0.55042	0.44958	0.352941	0.394958	0.252101	0.0175192
	rs1339458	G	A	119	0.752101	0.247899	0.554622	0.394958	0.0504202	0.0195282
	rs1345658	T	C	118	0.54661	0.45339	0.322034	0.449153	0.228814	0.0419525
	rs1353252	C	G	119	0.537815	0.462185	0.336134	0.403361	0.260504	0.0466549
	rs137116	C	T	119	0.731092	0.268908	0.529412	0.403361	0.0672269	0.0404884
	rs1385601	T	G	119	0.596639	0.403361	0.386555	0.420168	0.193277	0.0168665
	rs1405712	T	C	119	0.542017	0.457983	0.310924	0.462185	0.226891	0.048277
	rs1415961	T	C	119	0.617647	0.382353	0.403361	0.428571	0.168067	0.0254253
	rs1415966	G	A	119	0.588235	0.411765	0.361345	0.453782	0.184874	0.0277088
	rs1429161	G	C	119	0.630252	0.369748	0.378151	0.504202	0.117647	0.0150231
	rs1440150	A	G	119	0.831933	0.168067	0.705882	0.252101	0.0420168	0.0136356
	rs1468475	T	C	119	0.588235	0.411765	0.336134	0.504202	0.159664	0.0423546
	rs1494561	G	C	119	0.537815	0.462185	0.336134	0.403361	0.260504	0.0466549
	rs1533479	C	A	119	0.647059	0.352941	0.428571	0.436975	0.134454	0.0131071
	rs1549292	A	C	119	0.659664	0.340336	0.394958	0.529412	0.0756303	0.0356223
	rs1592159	C	T	116	0.538793	0.461207	0.267241	0.543103	0.189655	0.0406949
	rs1611759	G	T	119	0.617647	0.382353	0.403361	0.428571	0.168067	0.0254253
	rs169600	G	A	119	0.710084	0.289916	0.495798	0.428571	0.0756303	0.0296451
	rs1709114	T	C	119	0.978992	0.0210084	0.966387	0.0252101	0.00840336	0.025774
	rs1759481	G	T	119	0.831933	0.168067	0.680672	0.302521	0.0168067	0.0270685
	rs1798624	C	T	119	0.684874	0.315126	0.512605	0.344538	0.142857	0.00564762
	rs1799836	A	G	119	0.810924	0.189076	0.773109	0.0756303	0.151261	0.00928868
	rs1863839	T	C	119	0.516807	0.483193	0.285714	0.462185	0.252101	0.0105579
	rs1880669	G	A	119	0.57563	0.42437	0.336134	0.478992	0.184874	0.0441888
	rs1956717	G	A	119	0.579832	0.420168	0.344538	0.470588	0.184874	0.0429468
	rs1956720	G	C	119	0.579832	0.420168	0.344538	0.470588	0.184874	0.0429468
	rs2030452	G	C	118	0.75	0.25	0.533898	0.432203	0.0338983	0.000270333
	rs2066808	T	C	119	0.97479	0.0252101	0.957983	0.0336134	0.00840336	0.0461702
	rs2072019	G	A	119	0.563025	0.436975	0.327731	0.470588	0.201681	0.0446415
	rs2072783	T	C	119	0.579832	0.420168	0.294118	0.571429	0.134454	0.00307832
	rs2073425	T	C	119	0.571429	0.428571	0.336134	0.470588	0.193277	0.0272174
	rs2075109	T	C	119	0.693277	0.306723	0.495798	0.394958	0.109244	0.0054807
	rs207620	C	G	119	0.680672	0.319328	0.462185	0.436975	0.10084	0.0339601
	rs212088	C	T	119	0.747899	0.252101	0.563025	0.369748	0.0672269	0.00632683
	rs2127104	A	G	119	0.684874	0.315126	0.462185	0.445378	0.092437	0.0330106
	rs2232267	A	G	119	0.819328	0.180672	0.689076	0.260504	0.0504202	0.0344134
	rs2235989	T	A	119	0.655462	0.344538	0.462185	0.386555	0.151261	0.0377327
	rs2239567	C	T	119	0.865546	0.134454	0.764706	0.201681	0.0336134	0.0354756
	rs2254297	G	A	119	0.5	0.5	0.268908	0.462185	0.268908	0.0454908
	rs2271622	T	C	119	0.516807	0.483193	0.277311	0.478992	0.243697	0.047674
	rs2271705	C	T	118	0.661017	0.338983	0.432203	0.457627	0.110169	0.0126285
	rs2271942	T	C	117	0.581197	0.418803	0.333333	0.495726	0.17094	0.0423663
	rs2272152	G	A	119	0.638655	0.361345	0.386555	0.504202	0.109244	0.0370553
	rs2273090	C	A	119	0.815126	0.184874	0.663866	0.302521	0.0336134	0.0342067
	rs2273417	A	C	119	0.571429	0.428571	0.319328	0.504202	0.176471	0.0460656
	rs2276684	A	C	119	0.798319	0.201681	0.663866	0.268908	0.0672269	0.0422215
	rs2276921	G	C	119	0.558824	0.441176	0.319328	0.478992	0.201681	0.0440943
	rs2277638	A	G	119	0.87395	0.12605	0.764706	0.218487	0.0168067	0.0257769
	rs2280153	C	T	119	0.689076	0.310924	0.478992	0.420168	0.10084	0.0180895
	rs2280263	C	T	119	0.630252	0.369748	0.411765	0.436975	0.151261	0.0396993
	rs2280394	G	A	119	0.579832	0.420168	0.344538	0.470588	0.184874	0.0429468
	rs2280446	G	A	119	0.621849	0.378151	0.386555	0.470588	0.142857	0.0406686
	rs2281127	T	C	119	0.592437	0.407563	0.361345	0.462185	0.176471	0.00951664
	rs2281748	T	C	116	0.637931	0.362069	0.405172	0.465517	0.12931	0.00800961
	rs2282639	T	C	119	0.747899	0.252101	0.563025	0.369748	0.0672269	0.020751
	rs2285595	A	G	119	0.55042	0.44958	0.310924	0.478992	0.210084	0.0449087
	rs2287062	A	G	119	0.588235	0.411765	0.302521	0.571429	0.12605	0.00526249
	rs228840	G	A	119	0.773109	0.226891	0.596639	0.352941	0.0504202	0.00504914
	rs2288775	A	G	118	0.720339	0.279661	0.533898	0.372881	0.0932203	0.00814717
	rs2289492	C	T	119	0.684874	0.315126	0.445378	0.478992	0.0756303	0.0330106
	rs2290148	T	C	119	0.596639	0.403361	0.386555	0.420168	0.193277	0.00912552
	rs2291538	C	T	119	0.693277	0.306723	0.478992	0.428571	0.092437	0.010011
	rs2291726	T	C	119	0.689076	0.310924	0.487395	0.403361	0.109244	0.00139964
	rs2291898	C	T	119	0.546218	0.453782	0.260504	0.571429	0.168067	0.0182835
	rs2294037	C	T	119	0.558824	0.441176	0.327731	0.462185	0.210084	0.0295253
	rs2296581	G	A	118	0.699153	0.300847	0.5	0.398305	0.101695	0.0284934
	rs2296588	T	C	119	0.697479	0.302521	0.495798	0.403361	0.10084	0.01903
	rs2296590	G	A	117	0.700855	0.299145	0.504274	0.393162	0.102564	0.0282844
	rs2300808	A	G	118	0.847458	0.152542	0.728814	0.237288	0.0338983	0.0401822
	rs2302331	T	G	119	0.521008	0.478992	0.294118	0.453782	0.252101	0.0294184
	rs2306026	T	C	116	0.612069	0.387931	0.405172	0.413793	0.181034	0.014631
	rs2306090	T	C	119	0.537815	0.462185	0.327731	0.420168	0.252101	0.0466549
	rs2306645	C	T	119	0.52521	0.47479	0.235294	0.579832	0.184874	0.0453448
	rs2306699	T	A	119	0.676471	0.323529	0.470588	0.411765	0.117647	0.0196638
	rs2365794	C	T	119	0.62605	0.37395	0.378151	0.495798	0.12605	0.0237216
	rs2366148	A	G	119	0.915966	0.0840336	0.848739	0.134454	0.0168067	0.0178801
	rs2371455	G	T	119	0.596639	0.403361	0.403361	0.386555	0.210084	0.0442858
	rs2377628	T	A	119	0.588235	0.411765	0.352941	0.470588	0.176471	0.0423546
	rs2385208	A	G	119	0.680672	0.319328	0.453782	0.453782	0.092437	0.000744522
	rs2434895	A	C	119	0.945378	0.0546218	0.907563	0.0756303	0.0168067	0.0310921
	rs2517565	T	A	119	0.844538	0.155462	0.722689	0.243697	0.0336134	0.0427921
	rs2622711	G	A	119	0.546218	0.453782	0.294118	0.504202	0.201681	0.0182835
	rs268229	G	A	119	0.752101	0.247899	0.588235	0.327731	0.0840336	0.0383005
	rs268230	A	C	119	0.752101	0.247899	0.588235	0.327731	0.0840336	0.0383005
	rs268231	C	A	119	0.752101	0.247899	0.588235	0.327731	0.0840336	0.0383005
	rs2745107	C	T	119	0.630252	0.369748	0.411765	0.436975	0.151261	0.0150231
	rs2768630	G	A	119	0.722689	0.277311	0.546218	0.352941	0.10084	0.0247176
	rs2782649	T	C	119	0.89916	0.10084	0.806723	0.184874	0.00840336	0.0308481
	rs2793694	T	C	119	0.785714	0.214286	0.613445	0.344538	0.0420168	0.0270572
	rs2842184	A	G	119	0.882353	0.117647	0.773109	0.218487	0.00840336	0.010763
	rs2857300	G	A	119	0.521008	0.478992	0.260504	0.521008	0.218487	0.00626448
	rs2894043	C	G	119	0.836134	0.163866	0.705882	0.260504	0.0336134	0.0247119
	rs2908543	T	A	119	0.634454	0.365546	0.411765	0.445378	0.142857	0.0140923
	rs301488	G	A	119	0.546218	0.453782	0.285714	0.521008	0.193277	0.0462719
	rs3124509	C	T	119	0.592437	0.407563	0.369748	0.445378	0.184874	0.0265526
	rs321599	G	A	119	0.5	0.5	0.235294	0.529412	0.235294	0.0177672
	rs3731930	G	C	119	0.672269	0.327731	0.436975	0.470588	0.092437	0.0210027
	rs3738481	G	A	119	0.92437	0.0756303	0.857143	0.134454	0.00840336	0.00930293
	rs3740393	G	C	119	0.735294	0.264706	0.563025	0.344538	0.092437	0.012876
	rs3744317	T	C	119	0.92437	0.0756303	0.857143	0.134454	0.00840336	0.00183545
	rs3744439	A	G	119	0.852941	0.147059	0.722689	0.260504	0.0168067	0.0371899
	rs3747403	C	T	119	0.546218	0.453782	0.436975	0.218487	0.344538	0.0182835
	rs3747550	T	A	119	0.512605	0.487395	0.252101	0.521008	0.226891	0.028875
	rs3749180	G	T	119	0.588235	0.411765	0.378151	0.420168	0.201681	0.0423546
	rs3750131	A	G	119	0.596639	0.403361	0.344538	0.504202	0.151261	0.0442858
	rs3750132	A	G	119	0.504202	0.495798	0.235294	0.537815	0.226891	0.0179355
	rs3750729	G	A	119	0.617647	0.382353	0.352941	0.529412	0.117647	0.0399318
	rs3751261	T	C	119	0.764706	0.235294	0.554622	0.420168	0.0252101	0.030929
	rs3753454	G	A	119	0.617647	0.382353	0.403361	0.428571	0.168067	0.0254253
	rs3762613	T	C	119	0.806723	0.193277	0.672269	0.268908	0.0588235	0.004854
	rs3762632	G	T	118	0.648305	0.351695	0.432203	0.432203	0.135593	0.00640664
	rs3765537	G	T	119	0.722689	0.277311	0.504202	0.436975	0.0588235	0.0247176
	rs3796259	T	C	118	0.5	0.5	0.228814	0.542373	0.228814	0.0453287
	rs3802493	G	A	119	0.542017	0.457983	0.260504	0.563025	0.176471	0.048277
	rs3802712	A	G	119	0.676471	0.323529	0.470588	0.411765	0.117647	0.0331158
	rs3802965	C	G	119	0.785714	0.214286	0.621849	0.327731	0.0504202	0.0457512
	rs3806689	A	G	119	0.663866	0.336134	0.453782	0.420168	0.12605	0.0341108
	rs3815173	A	C	118	0.881356	0.118644	0.788136	0.186441	0.0254237	0.0490045
	rs3816805	T	C	113	0.557522	0.442478	0.309735	0.495575	0.19469	0.0292576
	rs3817346	T	C	119	0.869748	0.130252	0.756303	0.226891	0.0168067	0.0301036
	rs3817349	C	A	119	0.869748	0.130252	0.756303	0.226891	0.0168067	0.0301036
	rs3862047	T	C	119	0.588235	0.411765	0.344538	0.487395	0.168067	0.00325569
	rs3865444	G	T	119	0.806723	0.193277	0.672269	0.268908	0.0588235	0.0103521
	rs3923394	G	T	119	0.689076	0.310924	0.495798	0.386555	0.117647	0.0180895
	rs4078520	C	T	118	0.737288	0.262712	0.542373	0.389831	0.0677966	0.0371852
	rs435043	C	T	119	0.886555	0.113445	0.781513	0.210084	0.00840336	0.00239968
	rs4426048	G	A	119	0.735294	0.264706	0.537815	0.394958	0.0672269	0.00373239
	rs4476830	C	A	119	0.567227	0.432773	0.394958	0.344538	0.260504	0.00992313
	rs4500179	G	A	119	0.638655	0.361345	0.436975	0.403361	0.159664	0.00425039
	rs4641310	A	G	118	0.572034	0.427966	0.338983	0.466102	0.194915	0.0455975
	rs465208	G	A	118	0.605932	0.394068	0.364407	0.483051	0.152542	0.0155574
	rs4705203	A	G	119	0.852941	0.147059	0.747899	0.210084	0.0420168	0.0371899
	rs4711998	A	G	119	0.739496	0.260504	0.521008	0.436975	0.0420168	0.0374099
	rs4713217	A	G	119	0.592437	0.407563	0.369748	0.445378	0.184874	0.0430036
	rs4730071	C	T	118	0.724576	0.275424	0.533898	0.381356	0.0847458	0.0447698
	rs4737312	A	G	117	0.786325	0.213675	0.615385	0.34188	0.042735	0.0214309
	rs4759824	T	C	119	0.827731	0.172269	0.680672	0.294118	0.0252101	0.0302358
	rs4769055	A	C	118	0.521186	0.478814	0.271186	0.5	0.228814	0.0459773
	rs478630	C	T	119	0.588235	0.411765	0.378151	0.420168	0.201681	0.0423546
	rs4803674	A	T	119	0.558824	0.441176	0.310924	0.495798	0.193277	0.0109769
	rs4844550	A	G	119	0.718487	0.281513	0.512605	0.411765	0.0756303	0.0148653
	rs4862652	G	A	119	0.55042	0.44958	0.302521	0.495798	0.201681	0.000894771
	rs4970810	G	A	119	0.827731	0.172269	0.672269	0.310924	0.0168067	0.0302358
	rs4975134	T	C	119	0.739496	0.260504	0.546218	0.386555	0.0672269	0.0247132
	rs513009	C	T	119	0.743697	0.256303	0.563025	0.361345	0.0756303	0.022474
	rs525092	C	A	119	0.537815	0.462185	0.260504	0.554622	0.184874	0.0466549
	rs542407	G	A	119	0.722689	0.277311	0.521008	0.403361	0.0756303	0.0452461
	rs585356	G	A	119	0.903361	0.0966387	0.865546	0.0756303	0.0588235	0.0301902
	rs5942	G	A	119	0.680672	0.319328	0.453782	0.453782	0.092437	0.0187371
	rs598336	A	G	118	0.741525	0.258475	0.567797	0.347458	0.0847458	0.0234646
	rs623945	C	T	119	0.705882	0.294118	0.462185	0.487395	0.0504202	0.0287985
	rs642530	A	G	118	0.521186	0.478814	0.322034	0.398305	0.279661	0.00621385
	rs642899	A	C	119	0.785714	0.214286	0.596639	0.378151	0.0252101	0.0457512
	rs6453660	A	C	119	0.781513	0.218487	0.621849	0.319328	0.0588235	0.0300604
	rs6485786	G	C	119	0.701681	0.298319	0.487395	0.428571	0.0840336	0.0175853
	rs6523920	A	C	119	0.546218	0.453782	0.436975	0.218487	0.344538	0.0182835
	rs6559495	G	A	119	0.60084	0.39916	0.352941	0.495798	0.151261	0.0167946
	rs6565666	G	A	119	0.861345	0.138655	0.739496	0.243697	0.0168067	0.0360958
	rs6574651	G	A	118	0.555085	0.444915	0.29661	0.516949	0.186441	0.00349423
	rs6597573	G	C	119	0.504202	0.495798	0.252101	0.504202	0.243697	0.00363914
	rs670012	T	G	119	0.815126	0.184874	0.672269	0.285714	0.0420168	0.0342067
	rs6704126	T	G	119	0.529412	0.470588	0.243697	0.571429	0.184874	0.0451413
	rs6801872	G	A	119	0.554622	0.445378	0.302521	0.504202	0.193277	0.0441834
	rs6842078	A	G	118	0.855932	0.144068	0.754237	0.20339	0.0423729	0.019795
	rs6901322	A	T	119	0.701681	0.298319	0.487395	0.428571	0.0840336	0.0285139
	rs6939404	A	C	118	0.563559	0.436441	0.389831	0.347458	0.262712	0.0102153
	rs703075	C	A	119	0.617647	0.382353	0.403361	0.428571	0.168067	0.0254253
	rs7085104	A	G	119	0.651261	0.348739	0.445378	0.411765	0.142857	0.00728749
	rs710252	G	A	118	0.894068	0.105932	0.79661	0.194915	0.00847458	0.0180972
	rs7124433	G	C	119	0.655462	0.344538	0.462185	0.386555	0.151261	0.0139222
	rs7200919	G	A	119	0.819328	0.180672	0.680672	0.277311	0.0420168	0.0344134
	rs7299171	G	C	119	0.672269	0.327731	0.436975	0.470588	0.092437	0.00716116
	rs7333147	A	G	119	0.848739	0.151261	0.722689	0.252101	0.0252101	0.0098332
	rs736188	G	A	118	0.614407	0.385593	0.372881	0.483051	0.144068	0.0396393
	rs7522216	T	A	119	0.642857	0.357143	0.428571	0.428571	0.142857	0.0131398
	rs7558210	C	G	119	0.764706	0.235294	0.605042	0.319328	0.0756303	0.0187534
	rs7574442	G	C	119	0.668067	0.331933	0.436975	0.462185	0.10084	0.0331915
	rs761926	C	G	118	0.627119	0.372881	0.398305	0.457627	0.144068	0.023528
	rs765746	T	C	119	0.722689	0.277311	0.546218	0.352941	0.10084	0.0452461
	rs7702937	A	G	119	0.957983	0.0420168	0.92437	0.0672269	0.00840336	0.0475241
	rs7770592	C	A	119	0.647059	0.352941	0.453782	0.386555	0.159664	0.0131071
	rs7826127	T	C	119	0.815126	0.184874	0.672269	0.285714	0.0420168	0.00496449
	rs7833828	G	T	119	0.781513	0.218487	0.613445	0.336134	0.0504202	0.046398
	rs7855288	C	T	119	0.752101	0.247899	0.554622	0.394958	0.0504202	0.0383005
	rs7958846	G	C	119	0.605042	0.394958	0.378151	0.453782	0.168067	0.0414456
	rs8050447	T	C	119	0.588235	0.411765	0.310924	0.554622	0.134454	0.0423546
	rs8063003	A	G	119	0.810924	0.189076	0.672269	0.277311	0.0504202	0.0217839
	rs8094260	C	T	118	0.610169	0.389831	0.355932	0.508475	0.135593	0.00486569
	rs818714	C	T	118	0.783898	0.216102	0.610169	0.347458	0.0423729	0.0281582
	rs8192004	C	A	119	0.718487	0.281513	0.537815	0.361345	0.10084	0.0148653
	rs829406	A	G	119	0.605042	0.394958	0.394958	0.420168	0.184874	0.0052902
	rs839993	C	A	119	0.87395	0.12605	0.756303	0.235294	0.00840336	0.0111434
	rs842447	C	T	119	0.60084	0.39916	0.327731	0.546218	0.12605	0.0256181
	rs852701	G	A	119	0.714286	0.285714	0.512605	0.403361	0.0840336	0.0149889
	rs859008	G	A	119	0.710084	0.289916	0.521008	0.378151	0.10084	0.0296451
	rs871643	G	A	119	0.806723	0.193277	0.663866	0.285714	0.0504202	0.0364342
	rs878082	A	G	119	0.512605	0.487395	0.235294	0.554622	0.210084	0.0483798
	rs898604	G	A	119	0.613445	0.386555	0.403361	0.420168	0.176471	0.0147761
	rs899326	G	A	119	0.894958	0.105042	0.806723	0.176471	0.0168067	0.01831
	rs900381	G	C	119	0.563025	0.436975	0.310924	0.504202	0.184874	0.0446415
	rs911700	G	C	119	0.621849	0.378151	0.411765	0.420168	0.168067	0.0149944
	rs911701	T	A	119	0.621849	0.378151	0.411765	0.420168	0.168067	0.0149944
	rs937301	T	C	119	0.676471	0.323529	0.462185	0.428571	0.109244	0.0018814
	rs9376396	A	C	119	0.57563	0.42437	0.302521	0.546218	0.151261	0.0441888
	rs9379089	T	C	119	0.819328	0.180672	0.697479	0.243697	0.0588235	0.00435694
	rs9393960	G	C	119	0.810924	0.189076	0.689076	0.243697	0.0672269	0.0348796
	rs945641	T	C	118	0.762712	0.237288	0.567797	0.389831	0.0423729	0.0315673
	rs9486730	G	A	119	0.861345	0.138655	0.731092	0.260504	0.00840336	0.0360958
	rs9656375	G	A	119	0.512605	0.487395	0.294118	0.436975	0.268908	0.028875
	rs9889368	G	A	119	0.920168	0.0798319	0.848739	0.142857	0.00840336	0.0480909
	rs999147	A	G	119	0.831933	0.168067	0.705882	0.252101	0.0420168	0.0136356
	rs10494936	C	T	119	0.596639	0.403361	0.336134	0.521008	0.142857	0.0258572
	rs10739393	T	C	119	0.777311	0.222689	0.596639	0.361345	0.0420168	0.0479946
	rs10739787	A	G	119	0.747899	0.252101	0.554622	0.386555	0.0588235	0.0114551
	rs10742817	C	T	119	0.701681	0.298319	0.487395	0.428571	0.0840336	0.0175853
	rs10760587	C	G	118	0.724576	0.275424	0.550847	0.347458	0.101695	0.00750782
	rs10760692	C	T	119	0.747899	0.252101	0.554622	0.386555	0.0588235	0.0114551
	rs10785169	T	C	119	0.584034	0.415966	0.319328	0.529412	0.151261	0.0291084
	rs10786168	C	T	119	0.743697	0.256303	0.546218	0.394958	0.0588235	0.0369728
	rs10788221	G	A	119	0.701681	0.298319	0.495798	0.411765	0.092437	0.0175853
	rs10793289	C	A	119	0.731092	0.268908	0.571429	0.319328	0.109244	0.0404884
	rs10826179	A	G	119	0.529412	0.470588	0.285714	0.487395	0.226891	0.0451413
	rs10838610	A	G	118	0.881356	0.118644	0.779661	0.20339	0.0169492	0.0490045
	rs10933056	G	A	119	0.756303	0.243697	0.613445	0.285714	0.10084	0.0352229
	rs10988198	C	T	119	0.605042	0.394958	0.369748	0.470588	0.159664	0.015803
	rs11114635	G	A	119	0.815126	0.184874	0.647059	0.336134	0.0168067	0.0190339
	rs11240547	A	G	119	0.567227	0.432773	0.310924	0.512605	0.176471	0.0458271
	rs11258250	T	G	119	0.52521	0.47479	0.285714	0.478992	0.235294	0.0304046
	rs11580084	A	G	119	0.584034	0.415966	0.319328	0.529412	0.151261	0.0423359
	rs11657655	T	C	119	0.546218	0.453782	0.302521	0.487395	0.210084	0.00635177
	rs11779335	T	C	119	0.739496	0.260504	0.554622	0.369748	0.0756303	0.0247132
	rs11934603	C	T	119	0.857143	0.142857	0.731092	0.252101	0.0168067	0.0360815
	rs1217192	G	A	116	0.741379	0.258621	0.586207	0.310345	0.103448	0.011627
	rs1217419	T	G	119	0.802521	0.197479	0.672269	0.260504	0.0672269	0.01179
	rs12190980	C	G	119	0.680672	0.319328	0.470588	0.420168	0.109244	0.0114549
	rs12427026	C	G	119	0.915966	0.0840336	0.848739	0.134454	0.0168067	0.0178801
	rs12545009	A	T	119	0.613445	0.386555	0.386555	0.453782	0.159664	0.0398161
	rs12556510	C	A	119	0.966387	0.0336134	0.941176	0.0504202	0.00840336	0.0199277
	rs12670074	T	C	119	0.890756	0.109244	0.806723	0.168067	0.0252101	0.0363117
	rs12699957	G	C	119	0.60084	0.39916	0.378151	0.445378	0.176471	0.00164834
	rs3748603	C	T	119	0.554622	0.445378	0.310924	0.487395	0.201681	0.0300315
	rs12406221	A	G	119	0.794118	0.205882	0.638655	0.310924	0.0504202	0.0230175
	rs3759274	G	A	118	0.504237	0.495763	0.254237	0.5	0.245763	0.0456543
	rs1283470	G	C	119	0.823529	0.176471	0.689076	0.268908	0.0420168	0.0342416
	rs1284303	A	G	119	0.743697	0.256303	0.579832	0.327731	0.092437	0.0369728
	rs963626	A	G	119	0.806723	0.193277	0.663866	0.285714	0.0504202	0.0364342
	rs226899	C	T	119	0.802521	0.197479	0.638655	0.327731	0.0336134	0.01179
	rs2293141	T	A	119	0.609244	0.390756	0.369748	0.478992	0.151261	0.0403203
	rs6826015	T	C	119	0.861345	0.138655	0.756303	0.210084	0.0336134	0.0360958
	rs13120574	A	G	119	0.941176	0.0588235	0.890756	0.10084	0.00840336	0.0430232
	rs27018	A	G	119	0.785714	0.214286	0.621849	0.327731	0.0504202	0.0457512
	rs13192234	G	A	119	0.781513	0.218487	0.621849	0.319328	0.0588235	0.046398
	rs13192892	C	T	119	0.781513	0.218487	0.621849	0.319328	0.0588235	0.046398
	rs13226115	G	C	119	0.508403	0.491597	0.260504	0.495798	0.243697	0.010773
	rs1323552	T	G	119	0.609244	0.390756	0.361345	0.495798	0.142857	0.00273871
	rs13292501	T	C	119	0.92437	0.0756303	0.857143	0.134454	0.00840336	0.0370363
	rs3739843	A	G	119	0.588235	0.411765	0.361345	0.453782	0.184874	0.0277088
	rs13332660	T	C	119	0.579832	0.420168	0.352941	0.453782	0.193277	0.0429468
	rs136828	G	A	118	0.805085	0.194915	0.644068	0.322034	0.0338983	0.0371391
	rs138841	C	A	119	0.861345	0.138655	0.739496	0.243697	0.0168067	0.0360958
	rs139519	C	G	119	0.785714	0.214286	0.638655	0.294118	0.0672269	0.0457512
	rs1403528	A	G	119	0.718487	0.281513	0.529412	0.378151	0.092437	0.0148653
	rs1440153	T	C	119	0.819328	0.180672	0.672269	0.294118	0.0336134	0.0081994
	rs1472146	T	A	119	0.508403	0.491597	0.252101	0.512605	0.235294	0.0184415
	rs1478785	A	G	119	0.894958	0.105042	0.806723	0.176471	0.0168067	0.01831
	rs1560063	C	T	119	0.630252	0.369748	0.411765	0.436975	0.151261	0.0150231
	rs1568693	T	C	119	0.857143	0.142857	0.731092	0.252101	0.0168067	0.0360815
	rs1736672	T	A	119	0.957983	0.0420168	0.941176	0.0336134	0.0252101	0.0475241
	rs1799854	T	C	119	0.529412	0.470588	0.277311	0.504202	0.218487	0.0451413
	rs180205	C	T	119	0.806723	0.193277	0.663866	0.285714	0.0504202	0.0364342
	rs1879318	A	G	119	0.508403	0.491597	0.260504	0.495798	0.243697	0.0467732
	rs1898864	T	C	119	0.533613	0.466387	0.268908	0.529412	0.201681	0.0455775
	rs2037342	A	G	119	0.747899	0.252101	0.546218	0.403361	0.0504202	0.0372685
	rs2037343	G	A	119	0.747899	0.252101	0.546218	0.403361	0.0504202	0.0372685
	rs2051570	A	G	119	0.516807	0.483193	0.260504	0.512605	0.226891	0.047674
	rs205359	T	C	119	0.714286	0.285714	0.554622	0.319328	0.12605	0.0278763
	rs2074560	A	G	119	0.768908	0.231092	0.579832	0.378151	0.0420168	0.0298249
	rs2075144	A	G	119	0.537815	0.462185	0.294118	0.487395	0.218487	0.0466549
	rs2110581	A	G	119	0.537815	0.462185	0.294118	0.487395	0.218487	0.0466549
	rs225304	A	C	119	0.579832	0.420168	0.336134	0.487395	0.176471	0.00554274
	rs2296565	G	A	119	0.609244	0.390756	0.352941	0.512605	0.134454	0.0265059
	rs2301730	C	T	118	0.508475	0.491525	0.245763	0.525424	0.228814	0.010709
	rs2301924	A	G	119	0.777311	0.222689	0.630252	0.294118	0.0756303	0.0296681
	rs2306083	C	T	119	0.680672	0.319328	0.470588	0.420168	0.109244	0.0187371
	rs235440	G	T	119	0.815126	0.184874	0.680672	0.268908	0.0504202	0.0190339
	rs235441	C	T	119	0.726891	0.273109	0.554622	0.344538	0.10084	0.0155347
	rs2386119	T	C	119	0.857143	0.142857	0.731092	0.252101	0.0168067	0.0360815
	rs2428099	T	C	119	0.588235	0.411765	0.352941	0.470588	0.176471	0.0160366
	rs2446319	A	C	119	0.798319	0.201681	0.663866	0.268908	0.0672269	0.0219441
	rs245826	C	G	118	0.597458	0.402542	0.381356	0.432203	0.186441	0.0090227
	rs2541161	G	A	119	0.592437	0.407563	0.369748	0.445378	0.184874	0.0265526
	rs2237833	A	G	119	0.634454	0.365546	0.394958	0.478992	0.12605	0.0237899
	rs2070713	A	G	119	0.546218	0.453782	0.302521	0.487395	0.210084	0.0182835
	rs2728729	G	A	119	0.836134	0.163866	0.815126	0.0420168	0.142857	0.0247119
	rs2781541	G	A	119	0.558824	0.441176	0.310924	0.495798	0.193277	0.0169912
	rs2800980	C	T	119	0.655462	0.344538	0.411765	0.487395	0.10084	0.0377327
	rs2867461	G	A	119	0.617647	0.382353	0.403361	0.428571	0.168067	5.75038e-05
	rs2941673	T	C	117	0.679487	0.320513	0.461538	0.435897	0.102564	0.0112392
	rs3096175	C	T	119	0.630252	0.369748	0.369748	0.521008	0.109244	0.0150231
	rs3134425	G	A	119	0.726891	0.273109	0.546218	0.361345	0.092437	0.0431407
	rs35197	C	T	119	0.563025	0.436975	0.327731	0.470588	0.201681	0.0103365
	rs3733870	A	G	119	0.903361	0.0966387	0.823529	0.159664	0.0168067	0.0301902
	rs3737294	A	G	119	0.62605	0.37395	0.436975	0.378151	0.184874	0.0419438
	rs3737522	A	G	119	0.810924	0.189076	0.663866	0.294118	0.0420168	0.00928868
	rs3761890	T	C	119	0.588235	0.411765	0.344538	0.487395	0.168067	0.0423546
	rs3763558	C	A	119	0.89916	0.10084	0.806723	0.184874	0.00840336	0.000786676
	rs3776875	T	C	118	0.84322	0.15678	0.720339	0.245763	0.0338983	0.0439301
	rs3794727	C	T	119	0.831933	0.168067	0.680672	0.302521	0.0168067	0.0136356
	rs3810590	T	C	119	0.584034	0.415966	0.369748	0.428571	0.201681	0.0423359
	rs3821508	G	A	119	0.659664	0.340336	0.428571	0.462185	0.109244	0.0356223
	rs3826309	A	G	119	0.861345	0.138655	0.731092	0.260504	0.00840336	0.0360958
	rs3826310	G	A	119	0.861345	0.138655	0.731092	0.260504	0.00840336	0.0360958
	rs3830137	C	G	119	0.592437	0.407563	0.521008	0.142857	0.336134	0.00081608
	rs3851220	A	G	119	0.668067	0.331933	0.470588	0.394958	0.134454	0.0219799
	rs439339	T	C	119	0.794118	0.205882	0.638655	0.310924	0.0504202	0.0230175
	rs4512020	T	C	119	0.756303	0.243697	0.579832	0.352941	0.0672269	0.0352229
	rs4535700	C	T	119	0.642857	0.357143	0.411765	0.462185	0.12605	0.00856532
	rs4620866	G	A	118	0.610169	0.389831	0.364407	0.491525	0.144068	0.00274344
	rs4626603	G	C	119	0.739496	0.260504	0.554622	0.369748	0.0756303	0.0247132
	rs612688	C	T	119	0.806723	0.193277	0.655462	0.302521	0.0420168	0.0216312
	rs616871	A	T	119	0.844538	0.155462	0.722689	0.243697	0.0336134	0.0117517
	rs640627	G	A	119	0.714286	0.285714	0.529412	0.369748	0.10084	0.0439469
	rs6499562	G	A	119	0.605042	0.394958	0.386555	0.436975	0.176471	0.0414456
	rs6789468	A	G	119	0.945378	0.0546218	0.89916	0.092437	0.00840336	0.00618432
	rs6878974	A	G	119	0.844538	0.155462	0.722689	0.243697	0.0336134	0.0427921
	rs7410318	T	C	119	0.87395	0.12605	0.764706	0.218487	0.0168067	0.0111434
	rs7537914	G	A	118	0.745763	0.254237	0.576271	0.338983	0.0847458	0.0214668
	rs7692791	T	C	119	0.693277	0.306723	0.504202	0.378151	0.117647	0.0296271
	rs865094	A	G	119	0.739496	0.260504	0.546218	0.386555	0.0672269	0.0247132
	rs903997	G	C	119	0.663866	0.336134	0.445378	0.436975	0.117647	0.0341108
	rs9454732	G	A	119	0.823529	0.176471	0.689076	0.268908	0.0420168	0.0342416
	rs999474	G	A	119	0.693277	0.306723	0.504202	0.378151	0.117647	0.000768485
	rs999475	G	A	119	0.794118	0.205882	0.638655	0.310924	0.0504202	0.0230175
	rs10236401	C	A	119	0.57563	0.42437	0.319328	0.512605	0.168067	0.0273809
	rs10265985	A	G	119	0.57563	0.42437	0.319328	0.512605	0.168067	0.0273809
	rs10283129	G	A	119	0.789916	0.210084	0.596639	0.386555	0.0168067	0.0460566
	rs10496935	C	G	119	0.537815	0.462185	0.344538	0.386555	0.268908	0.00626848
	rs10511914	T	C	119	0.739496	0.260504	0.554622	0.369748	0.0756303	0.0247132
	rs1064627	T	C	118	0.84322	0.15678	0.720339	0.245763	0.0338983	0.0374488
	rs1121198	A	G	119	0.840336	0.159664	0.722689	0.235294	0.0420168	0.00210107
	rs1198982	A	G	119	0.819328	0.180672	0.680672	0.277311	0.0420168	0.0344134
	rs1265085	C	G	119	0.693277	0.306723	0.478992	0.428571	0.092437	0.0296271
	rs1349077	G	A	118	0.70339	0.29661	0.508475	0.389831	0.101695	0.0466708
	rs1415959	C	T	119	0.617647	0.382353	0.403361	0.428571	0.168067	0.0254253
	rs1468029	A	G	119	0.533613	0.466387	0.277311	0.512605	0.210084	0.00352904
	rs1546322	G	A	119	0.680672	0.319328	0.453782	0.453782	0.092437	0.000744522
	rs1547476	A	T	119	0.773109	0.226891	0.579832	0.386555	0.0336134	0.0170127
	rs1560502	C	T	119	0.542017	0.457983	0.319328	0.445378	0.235294	0.0191921
	rs1560596	C	T	118	0.826271	0.173729	0.669492	0.313559	0.0169492	0.0144343
	rs1709115	A	G	119	0.978992	0.0210084	0.966387	0.0252101	0.00840336	0.025774
	rs1759487	G	A	119	0.831933	0.168067	0.680672	0.302521	0.0168067	0.0270685
	rs178720	C	T	119	0.815126	0.184874	0.781513	0.0672269	0.151261	0.0342067
	rs179282	C	T	119	0.546218	0.453782	0.294118	0.504202	0.201681	0.0182835
	rs1799908	T	A	118	0.779661	0.220339	0.652542	0.254237	0.0932203	0.0299932
	rs1990249	G	A	119	0.634454	0.365546	0.369748	0.529412	0.10084	0.0380719
	rs2044537	A	G	119	0.596639	0.403361	0.378151	0.436975	0.184874	0.0442858
	rs2070519	C	A	119	0.718487	0.281513	0.512605	0.411765	0.0756303	0.0260257
	rs2071058	A	T	119	0.533613	0.466387	0.268908	0.529412	0.201681	0.0177744
	rs2071127	A	G	119	0.848739	0.151261	0.806723	0.0840336	0.109244	0.0394239
	rs2072142	G	A	119	0.630252	0.369748	0.420168	0.420168	0.159664	0.0150231
	rs2075219	A	G	119	0.57563	0.42437	0.319328	0.512605	0.168067	0.0273809
	rs2077848	A	G	119	0.554622	0.445378	0.319328	0.470588	0.210084	0.0170896
	rs2079082	A	G	119	0.810924	0.189076	0.655462	0.310924	0.0336134	0.0348796
	rs2082881	A	G	119	0.785714	0.214286	0.630252	0.310924	0.0588235	0.0270572
	rs2099553	T	C	119	0.831933	0.168067	0.722689	0.218487	0.0588235	0.0136356
	rs2099914	G	C	119	0.680672	0.319328	0.445378	0.470588	0.0840336	0.0114549
	rs2236165	T	C	119	0.777311	0.222689	0.596639	0.361345	0.0420168	0.0479946
	rs2239411	C	A	119	0.747899	0.252101	0.689076	0.117647	0.193277	0.0372685
	rs2241584	G	A	119	0.630252	0.369748	0.394958	0.470588	0.134454	0.0150231
	rs2242261	C	A	119	0.655462	0.344538	0.453782	0.403361	0.142857	0.00693893
	rs2242435	T	C	119	0.546218	0.453782	0.310924	0.470588	0.218487	0.0462719
	rs2242508	A	G	119	0.651261	0.348739	0.420168	0.462185	0.117647	0.00728749
	rs2249052	A	T	119	0.844538	0.155462	0.722689	0.243697	0.0336134	0.0427921
	rs2250422	T	G	119	0.857143	0.142857	0.739496	0.235294	0.0252101	0.0360815
	rs2258287	T	G	119	0.710084	0.289916	0.504202	0.411765	0.0840336	0.0296451
	rs2259657	C	T	119	0.882353	0.117647	0.773109	0.218487	0.00840336	0.00332665
	rs2270960	G	A	119	0.638655	0.361345	0.394958	0.487395	0.117647	0.0370553
	rs2271775	A	C	119	0.62605	0.37395	0.411765	0.428571	0.159664	0.0419438
	rs2273166	A	G	119	0.605042	0.394958	0.369748	0.470588	0.159664	0.0026778
	rs2273758	T	G	119	0.802521	0.197479	0.672269	0.260504	0.0672269	0.01179
	rs2275424	C	A	119	0.752101	0.247899	0.554622	0.394958	0.0504202	0.0195282
	rs2276390	A	C	119	0.655462	0.344538	0.462185	0.386555	0.151261	0.0139222
	rs2277216	C	T	119	0.504202	0.495798	0.260504	0.487395	0.252101	0.0458112
	rs2278158	C	A	119	0.684874	0.315126	0.478992	0.411765	0.109244	0.0182142
	rs2278517	C	G	118	0.652542	0.347458	0.423729	0.457627	0.118644	0.0134373
	rs2281816	C	T	119	0.512605	0.487395	0.268908	0.487395	0.243697	0.028875
	rs2281850	C	T	119	0.630252	0.369748	0.403361	0.453782	0.142857	0.0235354
	rs2282169	G	C	119	0.945378	0.0546218	0.89916	0.092437	0.00840336	9.66229e-05
	rs2282226	C	T	119	0.815126	0.184874	0.672269	0.285714	0.0420168	0.0342067
	rs2284978	G	A	119	0.634454	0.365546	0.386555	0.495798	0.117647	0.0380719
	rs2286267	G	A	119	0.542017	0.457983	0.327731	0.428571	0.243697	0.048277
	rs2286565	G	T	119	0.592437	0.407563	0.352941	0.478992	0.168067	0.0265526
	rs2286671	C	T	119	0.806723	0.193277	0.689076	0.235294	0.0756303	0.0103521
	rs2287061	T	C	118	0.588983	0.411017	0.305085	0.567797	0.127119	0.00523079
	rs2287063	T	C	119	0.62605	0.37395	0.344538	0.563025	0.092437	0.00811677
	rs2288259	C	T	118	0.707627	0.292373	0.508475	0.398305	0.0932203	0.00912827
	rs2291317	C	T	119	0.668067	0.331933	0.445378	0.445378	0.109244	0.00699092
	rs2291994	T	C	119	0.794118	0.205882	0.638655	0.310924	0.0504202	0.0464793
	rs2295069	A	G	119	0.836134	0.163866	0.714286	0.243697	0.0420168	0.0247119
	rs2295614	A	T	119	0.710084	0.289916	0.504202	0.411765	0.0840336	0.0296451
	rs2296406	T	C	119	0.630252	0.369748	0.403361	0.453782	0.142857	0.0235354
	rs2296589	T	A	119	0.697479	0.302521	0.495798	0.403361	0.10084	0.01903
	rs2298307	G	A	119	0.693277	0.306723	0.512605	0.361345	0.12605	0.010011
	rs2298472	C	T	119	0.747899	0.252101	0.563025	0.369748	0.0672269	0.0114551
	rs2298554	A	G	118	0.538136	0.461864	0.305085	0.466102	0.228814	0.028514
	rs2303079	C	G	119	0.848739	0.151261	0.722689	0.252101	0.0252101	0.0098332
	rs2303285	A	C	119	0.571429	0.428571	0.344538	0.453782	0.201681	0.0460656
	rs2304769	C	T	119	0.613445	0.386555	0.386555	0.453782	0.159664	0.0398161
	rs2334230	G	T	118	0.851695	0.148305	0.728814	0.245763	0.0254237	0.0226169
	rs236141	T	A	119	0.903361	0.0966387	0.823529	0.159664	0.0168067	0.0301902
	rs2371494	G	A	119	0.97479	0.0252101	0.957983	0.0336134	0.00840336	0.0461702
	rs2428954	T	C	119	0.890756	0.109244	0.789916	0.201681	0.00840336	0.00722906
	rs2576178	C	T	119	0.57563	0.42437	0.327731	0.495798	0.176471	0.0441888
	rs2635482	G	A	115	0.543478	0.456522	0.295652	0.495652	0.208696	0.0468421
	rs2672724	C	T	119	0.634454	0.365546	0.462185	0.344538	0.193277	0.0140923
	rs2673345	T	A	119	0.882353	0.117647	0.773109	0.218487	0.00840336	0.0200724
	rs273252	G	A	119	0.810924	0.189076	0.655462	0.310924	0.0336134	0.0217839
	rs2747565	G	A	119	0.537815	0.462185	0.285714	0.504202	0.210084	0.0466549
	rs2782648	G	T	119	0.89916	0.10084	0.806723	0.184874	0.00840336	0.0308481
	rs2822519	T	C	119	0.789916	0.210084	0.621849	0.336134	0.0420168	0.0132576
	rs2838372	G	A	114	0.600877	0.399123	0.412281	0.377193	0.210526	0.00725656
	rs2843441	G	C	119	0.794118	0.205882	0.630252	0.327731	0.0420168	0.0464793
	rs2980662	C	G	119	0.836134	0.163866	0.714286	0.243697	0.0420168	0.0135738
	rs3214063	A	G	119	0.672269	0.327731	0.436975	0.470588	0.092437	0.0210027
	rs355134	G	A	118	0.79661	0.20339	0.652542	0.288136	0.059322	0.0436919
	rs3731760	A	G	119	0.768908	0.231092	0.605042	0.327731	0.0672269	0.00868846
	rs3732574	T	C	119	0.613445	0.386555	0.369748	0.487395	0.142857	0.0269543
	rs3737499	T	C	119	0.542017	0.457983	0.277311	0.529412	0.193277	0.0283082
	rs3740253	G	A	119	0.512605	0.487395	0.226891	0.571429	0.201681	0.0483798
	rs3740397	C	G	119	0.630252	0.369748	0.428571	0.403361	0.168067	0.00501744
	rs3743204	G	T	119	0.747899	0.252101	0.579832	0.336134	0.0840336	0.0114551
	rs3746711	G	T	119	0.613445	0.386555	0.378151	0.470588	0.151261	0.0269543
	rs3749311	T	G	119	0.5	0.5	0.235294	0.529412	0.235294	0.0454908
	rs3749756	G	A	119	0.827731	0.172269	0.689076	0.277311	0.0336134	0.0302358
	rs3756106	C	T	119	0.630252	0.369748	0.403361	0.453782	0.142857	0.00501744
	rs3757283	C	A	119	0.504202	0.495798	0.201681	0.605042	0.193277	0.0179355
	rs3766223	G	T	119	0.609244	0.390756	0.369748	0.478992	0.151261	0.0265059
	rs3788428	A	G	119	0.638655	0.361345	0.403361	0.470588	0.12605	0.0370553
	rs3793777	C	T	119	0.596639	0.403361	0.319328	0.554622	0.12605	0.0442858
	rs3795903	T	C	118	0.766949	0.233051	0.610169	0.313559	0.0762712	0.0189772
	rs3801776	G	A	119	0.663866	0.336134	0.403361	0.521008	0.0756303	0.0121371
	rs3806428	G	A	119	0.62605	0.37395	0.403361	0.445378	0.151261	0.00491853
	rs3806964	T	C	119	0.689076	0.310924	0.478992	0.420168	0.10084	0.0180895
	rs3811149	C	T	119	0.554622	0.445378	0.319328	0.470588	0.210084	0.0300315
	rs3811424	T	C	119	0.642857	0.357143	0.394958	0.495798	0.109244	0.00243568
	rs3811658	C	T	119	0.546218	0.453782	0.310924	0.470588	0.218487	0.0102917
	rs3812430	T	G	119	0.504202	0.495798	0.243697	0.521008	0.235294	0.0458112
	rs3814492	A	G	119	0.592437	0.407563	0.361345	0.462185	0.176471	0.0265526
	rs3815269	C	T	119	0.651261	0.348739	0.428571	0.445378	0.12605	0.0376471
	rs3818780	C	G	119	0.785714	0.214286	0.655462	0.260504	0.0840336	0.0135599
	rs3821402	C	A	119	0.756303	0.243697	0.571429	0.369748	0.0588235	0.0352229
	rs3821403	C	A	119	0.756303	0.243697	0.571429	0.369748	0.0588235	0.0352229
	rs3826706	A	G	119	0.655462	0.344538	0.453782	0.403361	0.142857	0.0211538
	rs3851132	T	G	119	0.605042	0.394958	0.378151	0.453782	0.168067	0.0414456
	rs4072679	G	T	119	0.680672	0.319328	0.487395	0.386555	0.12605	0.0187371
	rs4132774	T	C	119	0.827731	0.172269	0.680672	0.294118	0.0252101	0.00840055
	rs4133017	A	G	119	0.819328	0.180672	0.663866	0.310924	0.0252101	0.0168717
	rs4148279	A	G	119	0.558824	0.441176	0.294118	0.529412	0.176471	0.0295253
	rs4321479	C	T	119	0.567227	0.432773	0.302521	0.529412	0.168067	0.017786
	rs4394387	A	G	119	0.907563	0.092437	0.840336	0.134454	0.0252101	0.00838285
	rs4396169	T	C	119	0.504202	0.495798	0.226891	0.554622	0.218487	0.0302312
	rs4484858	A	G	119	0.512605	0.487395	0.436975	0.151261	0.411765	0.000919481
	rs4687751	T	C	119	0.542017	0.457983	0.302521	0.478992	0.218487	0.00664302
	rs4693472	T	G	118	0.601695	0.398305	0.355932	0.491525	0.152542	0.0164872
	rs470112	C	G	119	0.785714	0.214286	0.638655	0.294118	0.0672269	0.0457512
	rs4705425	A	G	119	0.596639	0.403361	0.386555	0.420168	0.193277	0.00553371
	rs4713216	A	G	119	0.592437	0.407563	0.369748	0.445378	0.184874	0.0430036
	rs4713354	A	C	119	0.836134	0.163866	0.705882	0.260504	0.0336134	0.0247119
	rs4713683	G	C	119	0.521008	0.478992	0.294118	0.453782	0.252101	0.0181736
	rs472076	A	C	119	0.57563	0.42437	0.336134	0.478992	0.184874	0.0441888
	rs4747209	C	T	119	0.773109	0.226891	0.571429	0.403361	0.0252101	0.0294054
	rs4752927	T	C	119	0.584034	0.415966	0.361345	0.445378	0.193277	0.0423359
	rs4756195	G	A	119	0.760504	0.239496	0.563025	0.394958	0.0420168	0.018536
	rs480648	C	T	119	0.588235	0.411765	0.378151	0.420168	0.201681	0.0423546
	rs4971008	A	G	119	0.915966	0.0840336	0.840336	0.151261	0.00840336	0.0178801
	rs499013	C	T	119	0.878151	0.121849	0.764706	0.226891	0.00840336	0.0106851
	rs5029969	G	T	119	0.663866	0.336134	0.453782	0.420168	0.12605	0.0341108
	rs511969	C	A	119	0.521008	0.478992	0.294118	0.453782	0.252101	0.0294184
	rs523254	A	G	118	0.525424	0.474576	0.29661	0.457627	0.245763	0.0303458
	rs547798	G	T	119	0.596639	0.403361	0.386555	0.420168	0.193277	0.0168665
	rs596084	A	G	119	0.563025	0.436975	0.336134	0.453782	0.210084	0.0446415
	rs6014573	A	C	119	0.537815	0.462185	0.285714	0.504202	0.210084	0.018313
	rs6036860	A	G	119	0.60084	0.39916	0.352941	0.495798	0.151261	0.0431957
	rs620431	A	C	119	0.794118	0.205882	0.605042	0.378151	0.0168067	0.0464793
	rs6546443	C	A	119	0.806723	0.193277	0.672269	0.268908	0.0588235	0.004854
	rs6550514	C	T	119	0.92437	0.0756303	0.857143	0.134454	0.00840336	0.00183545
	rs6552113	C	T	119	0.533613	0.466387	0.277311	0.512605	0.210084	0.0455775
	rs6557640	T	A	119	0.558824	0.441176	0.285714	0.546218	0.168067	0.0109769
	rs6638869	A	G	119	0.60084	0.39916	0.504202	0.193277	0.302521	0.0167946
	rs6680646	A	T	118	0.70339	0.29661	0.483051	0.440678	0.0762712	0.0466708
	rs6765793	T	G	119	0.554622	0.445378	0.302521	0.504202	0.193277	0.0441834
	rs6799133	A	G	119	0.554622	0.445378	0.344538	0.420168	0.235294	0.011009
	rs683829	A	C	119	0.781513	0.218487	0.596639	0.369748	0.0336134	0.046398
	rs688585	T	A	119	0.579832	0.420168	0.344538	0.470588	0.184874	0.0100079
	rs6919609	G	T	119	0.508403	0.491597	0.277311	0.462185	0.260504	0.0467732
	rs7016041	T	C	119	0.571429	0.428571	0.327731	0.487395	0.184874	0.0182641
	rs7019373	T	C	119	0.588235	0.411765	0.361345	0.453782	0.184874	0.0277088
	rs714549	C	T	119	0.521008	0.478992	0.260504	0.521008	0.218487	0.00626448
	rs7194022	A	T	119	0.819328	0.180672	0.663866	0.310924	0.0252101	0.0344134
	rs721457	C	G	119	0.554622	0.445378	0.319328	0.470588	0.210084	0.0170896
	rs7281446	C	T	119	0.865546	0.134454	0.764706	0.201681	0.0336134	0.0354756
	rs730420	G	C	119	0.815126	0.184874	0.672269	0.285714	0.0420168	0.0190339
	rs7515191	G	A	118	0.766949	0.233051	0.576271	0.381356	0.0423729	0.0189772
	rs7522057	C	G	119	0.777311	0.222689	0.605042	0.344538	0.0504202	0.0479946
	rs7585742	G	C	117	0.752137	0.247863	0.538462	0.42735	0.034188	0.000275901
	rs7620648	A	C	118	0.54661	0.45339	0.305085	0.483051	0.211864	0.0459569
	rs324690	C	T	119	0.886555	0.113445	0.789916	0.193277	0.0168067	0.00239968
	rs7682201	G	A	119	0.869748	0.130252	0.764706	0.210084	0.0252101	0.0121602
	rs7785971	T	A	119	0.789916	0.210084	0.630252	0.319328	0.0504202	0.0132576
	rs7853047	A	G	119	0.638655	0.361345	0.436975	0.403361	0.159664	0.00425039
	rs2274030	G	A	118	0.864407	0.135593	0.754237	0.220339	0.0254237	0.0366808
	rs7929014	C	T	119	0.701681	0.298319	0.487395	0.428571	0.0840336	0.0175853
	rs796985	T	G	119	0.52521	0.47479	0.260504	0.529412	0.210084	0.0453448
	rs7988097	A	C	119	0.928571	0.0714286	0.865546	0.12605	0.00840336	0.00639891
	rs7996544	G	A	119	0.739496	0.260504	0.588235	0.302521	0.109244	0.0374099
	rs8039462	G	C	119	0.735294	0.264706	0.546218	0.378151	0.0756303	0.00693688
	rs8060790	G	A	117	0.602564	0.397436	0.393162	0.418803	0.188034	0.00883311
	rs8075218	T	C	119	0.87395	0.12605	0.764706	0.218487	0.0168067	0.0257769
	rs8078195	A	C	119	0.87395	0.12605	0.764706	0.218487	0.0168067	0.0257769
	rs810965	G	T	119	0.672269	0.327731	0.470588	0.403361	0.12605	0.00328378
	rs8121509	C	T	119	0.684874	0.315126	0.453782	0.462185	0.0840336	0.00333694
	rs812279	G	T	119	0.567227	0.432773	0.369748	0.394958	0.235294	0.0458271
	rs822681	G	A	119	0.819328	0.180672	0.672269	0.294118	0.0336134	0.0344134
	rs823144	C	A	119	0.5	0.5	0.226891	0.546218	0.226891	0.0454908
	rs830131	T	C	119	0.710084	0.289916	0.487395	0.445378	0.0672269	0.0444492
	rs859009	C	G	119	0.710084	0.289916	0.521008	0.378151	0.10084	0.0296451
	rs859013	T	C	119	0.710084	0.289916	0.521008	0.378151	0.10084	0.0296451
	rs861318	C	T	119	0.756303	0.243697	0.563025	0.386555	0.0504202	0.0352229
	rs9367644	T	G	119	0.567227	0.432773	0.394958	0.344538	0.260504	0.00992313
	rs944613	T	C	119	0.52521	0.47479	0.268908	0.512605	0.218487	0.0453448
	rs958187	G	T	119	0.714286	0.285714	0.521008	0.386555	0.092437	0.0278763
	rs9632915	A	C	118	0.512712	0.487288	0.305085	0.415254	0.279661	0.0482648
	rs9835677	G	A	119	0.848739	0.151261	0.714286	0.268908	0.0168067	0.022295
	rs9838614	T	G	119	0.57563	0.42437	0.319328	0.512605	0.168067	0.0172138
	rs985277	C	A	119	0.714286	0.285714	0.521008	0.386555	0.092437	0.0439469
	rs9869842	G	A	119	0.546218	0.453782	0.302521	0.487395	0.210084	0.0462719
	rs9896245	A	G	119	0.697479	0.302521	0.504202	0.386555	0.109244	0.01903
	rs9919887	A	G	119	0.743697	0.256303	0.537815	0.411765	0.0504202	0.0369728
	rs10097258	A	G	119	0.508403	0.491597	0.277311	0.462185	0.260504	0.0467732
	rs10212995	G	A	119	0.827731	0.172269	0.680672	0.294118	0.0252101	0.0141955
	rs10406449	A	G	119	0.932773	0.0672269	0.87395	0.117647	0.00840336	0.0202414
	rs10458302	G	A	119	0.508403	0.491597	0.277311	0.462185	0.260504	0.0467732
	rs10513898	A	T	119	0.747899	0.252101	0.571429	0.352941	0.0756303	0.020751
	rs1054812	T	C	119	0.718487	0.281513	0.537815	0.361345	0.10084	0.00414541
	rs1076562	A	G	119	0.588235	0.411765	0.361345	0.453782	0.184874	0.0101259
	rs10786172	A	G	119	0.760504	0.239496	0.571429	0.378151	0.0504202	0.018536
	rs10792278	G	T	119	0.55042	0.44958	0.310924	0.478992	0.210084	0.0175192
	rs10807204	C	G	119	0.579832	0.420168	0.344538	0.470588	0.184874	0.0164962
	rs10808141	T	G	118	0.762712	0.237288	0.59322	0.338983	0.0677966	0.0315673
	rs10808903	C	A	119	0.630252	0.369748	0.428571	0.403361	0.168067	0.0235354
	rs10846739	T	C	119	0.55042	0.44958	0.285714	0.529412	0.184874	0.0449087
	rs10861104	A	C	119	0.617647	0.382353	0.344538	0.546218	0.109244	0.0399318
	rs10879900	C	T	119	0.508403	0.491597	0.285714	0.445378	0.268908	0.0467732
	rs10887033	T	A	118	0.707627	0.292373	0.508475	0.398305	0.0932203	0.0449373
	rs10892636	G	A	119	0.521008	0.478992	0.260504	0.521008	0.218487	0.0461882
	rs10999015	G	A	119	0.789916	0.210084	0.613445	0.352941	0.0336134	0.00717725
	rs11057820	C	T	119	0.806723	0.193277	0.655462	0.302521	0.0420168	0.0364342
	rs11139065	G	T	119	0.592437	0.407563	0.361345	0.462185	0.176471	0.0162898
	rs11189413	A	G	119	0.861345	0.138655	0.764706	0.193277	0.0420168	0.0066142
	rs11240594	A	G	118	0.597458	0.402542	0.330508	0.533898	0.135593	0.00411808
	rs11243862	G	C	119	0.802521	0.197479	0.630252	0.344538	0.0252101	0.0214842
	rs11243864	C	G	119	0.802521	0.197479	0.630252	0.344538	0.0252101	0.0214842
	rs11644094	A	G	118	0.84322	0.15678	0.711864	0.262712	0.0254237	0.0123861
	rs11650605	G	C	119	0.798319	0.201681	0.613445	0.369748	0.0168067	0.0422215
	rs11654092	G	A	119	0.747899	0.252101	0.563025	0.369748	0.0672269	0.0372685
	rs11669732	C	T	119	0.92437	0.0756303	0.857143	0.134454	0.00840336	0.0370363
	rs11677062	C	G	119	0.731092	0.268908	0.521008	0.420168	0.0588235	0.0404884
	rs11690827	A	T	119	0.676471	0.323529	0.487395	0.378151	0.134454	0.0196638
	rs12197738	A	C	119	0.689076	0.310924	0.478992	0.420168	0.10084	0.0180895
	rs12435764	T	G	119	0.726891	0.273109	0.537815	0.378151	0.0840336	0.0155347
	rs12456573	T	A	118	0.711864	0.288136	0.516949	0.389831	0.0932203	0.0290776
	rs12491914	A	C	119	0.621849	0.378151	0.386555	0.470588	0.142857	0.0243501
	rs12512518	G	C	119	0.62605	0.37395	0.403361	0.445378	0.151261	0.0419438
	rs12553491	G	A	119	0.592437	0.407563	0.361345	0.462185	0.176471	0.0162898
	rs12612947	A	T	119	0.731092	0.268908	0.512605	0.436975	0.0504202	0.0404884
	rs12668539	T	C	119	0.512605	0.487395	0.260504	0.504202	0.235294	0.0192893
	rs12671091	C	T	119	0.508403	0.491597	0.252101	0.512605	0.235294	0.010773
	rs12681579	G	T	119	0.508403	0.491597	0.277311	0.462185	0.260504	0.0467732
	rs12021529	T	C	119	0.55042	0.44958	0.277311	0.546218	0.176471	0.0105364
	rs1149152	T	C	119	0.806723	0.193277	0.655462	0.302521	0.0420168	0.0364342
	rs10999012	T	C	119	0.865546	0.134454	0.773109	0.184874	0.0420168	0.0137672
	rs3824932	T	C	118	0.559322	0.440678	0.338983	0.440678	0.220339	0.0439672
	rs10162606	T	C	119	0.546218	0.453782	0.294118	0.504202	0.201681	0.0462719
	rs722069	T	C	119	0.62605	0.37395	0.361345	0.529412	0.109244	0.0237216
	rs7202661	C	A	119	0.651261	0.348739	0.394958	0.512605	0.092437	0.00728749
	rs7203580	A	G	119	0.605042	0.394958	0.336134	0.537815	0.12605	0.0414456
	rs2541240	G	A	119	0.710084	0.289916	0.478992	0.462185	0.0588235	0.0154785
	rs12942539	C	T	119	0.609244	0.390756	0.394958	0.428571	0.176471	0.0151324
	rs9951973	C	G	119	0.521008	0.478992	0.302521	0.436975	0.260504	0.0294184
	rs13026475	T	C	119	0.928571	0.0714286	0.865546	0.12605	0.00840336	0.0277918
	rs5749939	C	T	119	0.735294	0.264706	0.563025	0.344538	0.092437	0.0385804
	rs13110602	G	A	119	0.827731	0.172269	0.680672	0.294118	0.0252101	0.0141955
	rs13148223	A	G	119	0.739496	0.260504	0.554622	0.369748	0.0756303	0.0247132
	rs13192116	A	C	118	0.584746	0.415254	0.381356	0.40678	0.211864	0.0289075
	rs2575876	G	A	119	0.718487	0.281513	0.512605	0.411765	0.0756303	0.0442113
	rs1334586	A	G	119	0.588235	0.411765	0.319328	0.537815	0.142857	0.0423546
	rs13401104	G	A	119	0.844538	0.155462	0.714286	0.260504	0.0252101	0.0427921
	rs1344836	G	A	119	0.630252	0.369748	0.386555	0.487395	0.12605	0.0150231
	rs1420740	T	C	119	0.920168	0.0798319	0.848739	0.142857	0.00840336	0.0480909
	rs1457287	C	T	119	0.508403	0.491597	0.277311	0.462185	0.260504	0.0467732
	rs1468727	T	C	119	0.57563	0.42437	0.352941	0.445378	0.201681	0.0273809
	rs1472254	T	C	119	0.819328	0.180672	0.672269	0.294118	0.0336134	0.0344134
	rs1485393	A	G	119	0.676471	0.323529	0.470588	0.411765	0.117647	0.0196638
	rs1499245	T	C	119	0.840336	0.159664	0.722689	0.235294	0.0420168	0.00210107
	rs1543709	C	T	119	0.747899	0.252101	0.563025	0.369748	0.0672269	0.0372685
	rs1569769	C	A	119	0.592437	0.407563	0.352941	0.478992	0.168067	0.0430036
	rs165934	A	C	119	0.739496	0.260504	0.546218	0.386555	0.0672269	0.0247132
	rs1680789	T	G	119	0.592437	0.407563	0.352941	0.478992	0.168067	0.0162898
	rs1680790	T	G	119	0.542017	0.457983	0.294118	0.495798	0.210084	0.0191921
	rs1780329	T	G	119	0.596639	0.403361	0.344538	0.504202	0.151261	0.0442858
	rs1796384	A	G	119	0.596639	0.403361	0.386555	0.420168	0.193277	0.00912552
	rs1800632	G	A	119	0.806723	0.193277	0.647059	0.319328	0.0336134	0.0364342
	rs1814534	A	C	119	0.542017	0.457983	0.294118	0.495798	0.210084	0.048277
	rs1911240	A	G	118	0.588983	0.411017	0.347458	0.483051	0.169492	0.0159793
	rs1926034	C	T	119	0.60084	0.39916	0.411765	0.378151	0.210084	0.0431957
	rs1962684	A	C	118	0.783898	0.216102	0.635593	0.29661	0.0677966	0.0281582
	rs1991533	G	A	119	0.710084	0.289916	0.495798	0.428571	0.0756303	0.0444492
	rs2067534	A	G	119	0.60084	0.39916	0.352941	0.495798	0.151261	0.0167946
	rs2070306	A	C	119	0.588235	0.411765	0.344538	0.487395	0.168067	0.0423546
	rs2072855	C	A	119	0.55042	0.44958	0.310924	0.478992	0.210084	0.0175192
	rs2075403	G	A	119	0.739496	0.260504	0.537815	0.403361	0.0588235	0.00331694
	rs2121344	T	C	119	0.756303	0.243697	0.563025	0.386555	0.0504202	0.0187928
	rs2135116	T	C	119	0.634454	0.365546	0.394958	0.478992	0.12605	0.0140923
	rs213732	T	C	119	0.957983	0.0420168	0.92437	0.0672269	0.00840336	0.0475241
	rs2239378	C	T	119	0.630252	0.369748	0.386555	0.487395	0.12605	0.0396993
	rs2253407	A	C	119	0.508403	0.491597	0.277311	0.462185	0.260504	0.0467732
	rs226428	G	A	119	0.508403	0.491597	0.243697	0.529412	0.226891	0.0293148
	rs2267995	G	C	119	0.512605	0.487395	0.302521	0.420168	0.277311	0.0483798
	rs2270755	A	C	118	0.54661	0.45339	0.254237	0.584746	0.161017	0.0283251
	rs2280665	C	T	119	0.642857	0.357143	0.428571	0.428571	0.142857	0.0241556
	rs2280666	C	T	119	0.584034	0.415966	0.352941	0.462185	0.184874	0.0423359
	rs2282481	G	A	119	0.815126	0.184874	0.672269	0.285714	0.0420168	0.0342067
	rs2286541	G	T	119	0.747899	0.252101	0.554622	0.386555	0.0588235	0.0372685
	rs235428	C	T	119	0.815126	0.184874	0.680672	0.268908	0.0504202	0.0190339
	rs2357587	T	C	119	0.571429	0.428571	0.302521	0.537815	0.159664	0.0460656
	rs2383750	G	A	119	0.701681	0.298319	0.495798	0.411765	0.092437	0.0477552
	rs2633312	T	A	119	0.87395	0.12605	0.773109	0.201681	0.0252101	0.0111434
	rs2669124	C	T	119	0.861345	0.138655	0.747899	0.226891	0.0252101	0.0360958
	rs2695789	T	G	119	0.97479	0.0252101	0.957983	0.0336134	0.00840336	0.0461702
	rs2764618	C	T	119	0.579832	0.420168	0.294118	0.571429	0.134454	0.02801
	rs277891	T	C	119	0.504202	0.495798	0.201681	0.605042	0.193277	0.0458112
	rs277904	T	C	117	0.521368	0.478632	0.205128	0.632479	0.162393	0.029241
	rs278991	G	C	119	0.768908	0.231092	0.596639	0.344538	0.0588235	0.0298249
	rs2814197	T	C	119	0.878151	0.121849	0.773109	0.210084	0.0168067	0.0224482
	rs2822537	G	A	118	0.504237	0.495763	0.271186	0.466102	0.262712	0.0300997
	rs2918462	G	A	119	0.693277	0.306723	0.512605	0.361345	0.12605	0.010011
	rs2953857	A	G	119	0.743697	0.256303	0.563025	0.361345	0.0756303	0.0369728
	rs2955202	A	G	119	0.743697	0.256303	0.563025	0.361345	0.0756303	0.0369728
	rs2959341	G	C	119	0.735294	0.264706	0.537815	0.394958	0.0672269	0.0385804
	rs2981451	C	A	119	0.773109	0.226891	0.579832	0.386555	0.0336134	0.0170127
	rs1107550	C	T	119	0.533613	0.466387	0.285714	0.495798	0.218487	0.0455775
	rs3219243	T	C	119	0.705882	0.294118	0.495798	0.420168	0.0840336	0.0287985
	rs337449	T	G	119	0.584034	0.415966	0.294118	0.579832	0.12605	0.0423359
	rs359975	C	G	119	0.60084	0.39916	0.369748	0.462185	0.168067	0.0167946
	rs3744865	C	A	119	0.739496	0.260504	0.537815	0.403361	0.0588235	0.00331694
	rs3758156	C	T	119	0.567227	0.432773	0.294118	0.546218	0.159664	0.0275188
	rs3765479	G	A	119	0.663866	0.336134	0.571429	0.184874	0.243697	0.00377216
	rs3774987	G	C	119	0.542017	0.457983	0.310924	0.462185	0.226891	0.048277
	rs3783337	A	T	119	0.857143	0.142857	0.731092	0.252101	0.0168067	0.0189148
	rs378431	G	A	119	0.840336	0.159664	0.722689	0.235294	0.0420168	0.00210107
	rs3818409	G	A	119	0.689076	0.310924	0.462185	0.453782	0.0840336	0.0108169
	rs3821196	A	G	119	0.62605	0.37395	0.344538	0.563025	0.092437	0.00811677
	rs3949766	G	A	119	0.764706	0.235294	0.605042	0.319328	0.0756303	0.00477868
	rs411236	C	T	119	0.722689	0.277311	0.529412	0.386555	0.0840336	0.0452461
	rs41562	T	C	119	0.764706	0.235294	0.596639	0.336134	0.0672269	0.030929
	rs42293	C	G	119	0.810924	0.189076	0.672269	0.277311	0.0504202	0.0217839
	rs4272555	C	T	119	0.957983	0.0420168	0.94958	0.0168067	0.0336134	0.00865496
	rs4423794	G	A	119	0.508403	0.491597	0.218487	0.579832	0.201681	0.0467732
	rs4528139	T	G	117	0.901709	0.0982906	0.820513	0.162393	0.017094	0.0300374
	rs455726	C	T	119	0.613445	0.386555	0.386555	0.453782	0.159664	0.0398161
	rs459809	T	C	117	0.606838	0.393162	0.367521	0.478632	0.153846	0.0258425
	rs4653889	A	G	118	0.622881	0.377119	0.398305	0.449153	0.152542	0.00473709
	rs4663305	T	C	119	0.92437	0.0756303	0.857143	0.134454	0.00840336	0.0370363
	rs4676894	A	G	119	0.60084	0.39916	0.352941	0.495798	0.151261	0.00164834
	rs4688490	G	A	119	0.512605	0.487395	0.285714	0.453782	0.260504	0.0483798
	rs4728734	C	T	119	0.508403	0.491597	0.277311	0.462185	0.260504	0.0293148
	rs4773917	T	C	119	0.55042	0.44958	0.285714	0.529412	0.184874	0.0289833
	rs4792191	A	G	119	0.508403	0.491597	0.285714	0.445378	0.268908	0.0467732
	rs4809302	G	A	117	0.551282	0.448718	0.34188	0.418803	0.239316	0.0172358
	rs4923025	G	T	119	0.546218	0.453782	0.252101	0.588235	0.159664	0.0284099
	rs4938397	G	T	119	0.621849	0.378151	0.352941	0.537815	0.109244	0.0406686
	rs4939364	G	A	119	0.62605	0.37395	0.428571	0.394958	0.176471	0.0419438
	rs4940669	A	G	119	0.739496	0.260504	0.537815	0.403361	0.0588235	0.00331694
	rs4951744	A	G	119	0.596639	0.403361	0.336134	0.521008	0.142857	0.0258572
	rs4964806	A	G	119	0.52521	0.47479	0.277311	0.495798	0.226891	0.0453448
	rs5030091	T	C	119	0.621849	0.378151	0.428571	0.386555	0.184874	0.0243501
	rs503734	T	C	119	0.718487	0.281513	0.529412	0.378151	0.092437	0.0260257
	rs650461	C	G	119	0.655462	0.344538	0.462185	0.386555	0.151261	0.0139222
	rs9304688	G	A	119	0.558824	0.441176	0.319328	0.478992	0.201681	0.0295253
	rs964551	G	T	119	0.613445	0.386555	0.403361	0.420168	0.176471	0.0147761
	rs1003258	A	G	119	0.537815	0.462185	0.268908	0.537815	0.193277	0.018313
	rs10058571	T	C	119	0.722689	0.277311	0.546218	0.352941	0.10084	0.0151046
	rs10111786	A	T	119	0.684874	0.315126	0.495798	0.378151	0.12605	0.0330106
	rs10209637	C	T	119	0.579832	0.420168	0.344538	0.470588	0.184874	0.02801
	rs1031287	A	C	119	0.529412	0.470588	0.294118	0.470588	0.235294	0.0308404
	rs10485671	T	C	119	0.57563	0.42437	0.344538	0.462185	0.193277	0.0441888
	rs10489642	A	G	119	0.722689	0.277311	0.537815	0.369748	0.092437	0.0452461
	rs10490191	G	A	119	0.584034	0.415966	0.403361	0.361345	0.235294	0.0423359
	rs10494059	G	T	119	0.596639	0.403361	0.352941	0.487395	0.159664	0.0168665
	rs10496702	G	A	119	0.886555	0.113445	0.789916	0.193277	0.0168067	0.00964375
	rs10498866	G	A	119	0.596639	0.403361	0.361345	0.470588	0.168067	0.0258572
	rs10499044	A	G	119	0.794118	0.205882	0.621849	0.344538	0.0336134	0.0464793
	rs10510013	T	C	119	0.785714	0.214286	0.605042	0.361345	0.0336134	0.0457512
	rs1150574	C	G	119	0.789916	0.210084	0.630252	0.319328	0.0504202	0.0247164
	rs1153533	C	T	119	0.743697	0.256303	0.546218	0.394958	0.0588235	0.0369728
	rs1160748	T	G	119	0.739496	0.260504	0.563025	0.352941	0.0840336	0.000803963
	rs1225891	T	C	119	0.508403	0.491597	0.218487	0.579832	0.201681	0.0467732
	rs1242058	G	T	119	0.584034	0.415966	0.310924	0.546218	0.142857	0.0291084
	rs1273237	G	A	119	0.609244	0.390756	0.369748	0.478992	0.151261	0.0265059
	rs1322142	G	A	119	0.521008	0.478992	0.260504	0.521008	0.218487	0.0461882
	rs1349109	C	T	119	0.886555	0.113445	0.789916	0.193277	0.0168067	0.041159
	rs1352746	T	C	119	0.571429	0.428571	0.344538	0.453782	0.201681	0.0460656
	rs1368025	A	C	119	0.684874	0.315126	0.495798	0.378151	0.12605	0.011895
	rs1369793	T	C	119	0.911765	0.0882353	0.848739	0.12605	0.0252101	0.0238193
[truncated: 1,811 more rows]
